# Supplementary material
Source: PubMed Central journal article supplement (PMC4920340)
Supplement: rstb20150140supp1.pdf [file rstb20150140supp1.pdf]

# Mammal Madness: Is the mammal Tree of Life not yet resolved?

Nicole M. Foley<sup>1</sup>, Mark S. Springer<sup>2\*</sup>, Emma C. Teeling<sup>1\*</sup>

<sup>1</sup>School of Biology and Environmental Science, Science Centre East, University College Dublin, Dublin 4, Ireland

<sup>2</sup>Department of Biology, University of California, Riverside, CA 92521, USA

\*Corresponding authors: [emma.teeling@ucd.ie](mailto:emma.teeling@ucd.ie); [mark.springer@ucr.edu](mailto:mark.springer@ucr.edu)

## Supplementary Material

Table S1. Taxa, Genes and Accession Numbers for data used to construct the ML phylogeny used for the mcmctree Timetree analysis

| Name                              | A2AB                             | Adora3               | ADRB2         | ApoB                   |
|-----------------------------------|----------------------------------|----------------------|---------------|------------------------|
| <i>Abrocoma bennettii</i>         | JN413803                         | JN633431             | JN633687      | JN414044               |
| <i>Acinonyx jubatus</i>           | LLWD01000410                     | GU930839             | LLWD01000663  | LLWD01000008           |
| <i>Acrobates pygmaeus</i>         | JN413804                         | JN633400             | XXXXXX        | FJ603115 + JN413923    |
| <i>Aepyprymnus rufescens</i>      | JN413805                         | JN633405             | XXXXXX        | EU160444 + JN413924    |
| <i>Ailuropoda melanoleuca</i>     | Ensembl 66                       | Ensembl 65           | JN633677      | JN413997               |
| <i>Ailurus fulgens</i>            | JN413807                         | GU930877             | JN633669      | JN413985               |
| <i>Amblysomus hottentotus</i>     | JN413808                         | AY059667             | AY059671      | AF548413 + JN413946    |
| <i>Anomalurus beecrofti</i>       | JN413809                         | JN633432             | JN633688      | JN414046               |
| <i>Anoura geoffroyi</i>           | AY834407                         | XXXXXX               | AY834447      | XXXXXX                 |
| <i>Antilocapra americana</i>      | JN413810                         | JN633419             | JN633664      | JN413962               |
| <i>Antrozous pallidus</i>         | AJ419813                         | XXXXXX               | AY834449      | XXXXXX                 |
| <i>Aotus nancymae</i>             | JYKP01225662                     | HM765179             | JYKP01000449  | JYKP01052177           |
| <i>Aplodontia rufa</i>            | AJ427256                         | JN633433             | JN633689      | JN414047               |
| <i>Apodemus sylvaticus</i>        | LIPJ01002069                     | LIPJ01004413 deleted | LIPJ01013063  | LIPJ01014221           |
|                                   |                                  | string of Ns         |               |                        |
| <i>Arctocephalus forsteri</i>     | JN413811                         | GU930872             | XXXXXX        | JN413994               |
| <i>Artibeus jamaicensis</i>       | AY834406                         | AY011232             | AY011292      | JN414014               |
| <i>Ateles fusciceps</i>           | JN413812                         | AY011227             | AY011287      | JN414034               |
| <i>Balaena mysticetus</i>         | scaffold 259                     | scaffold 1896        | Scaffold 616  | Scaffold 679           |
| <i>Balaenoptera acutorostrata</i> | ATDI01097136                     | ATDI01126378         | ATDI01010399  | ATDI01129149           |
| <i>Balaenoptera bonaerensis</i>   | BAUQ01548583                     | BAUQ01701950         | BAUQ01306670  | BAUQ01117447           |
| <i>Bison bison</i>                | JPYT01646865 and<br>JPYT01096867 | JPYT01102624         | JPYT01281498  | JPYT01256889           |
| <i>Bos grunniens</i>              | AGSK01042505                     | AGSK01150640         | AGSK01186512  | AGSK01074478           |
| <i>Bos indicus</i>                | AGFL01098610                     | AGFL01025611         | AGFL01068595  | AGFL01104453           |
| <i>Bos taurus</i>                 | Ensembl 66                       | Ensembl 64           | Ensembl 65    | XM_003582812           |
| <i>Bradypus tridactylus</i>       | AJ251179                         | JN633417             | JN633662      | JN413959               |
| <i>Bubalus bubalis</i>            | AWWX01488187                     | XM_006069469         | AWWX01461940  | AWWX01627910           |
| <i>Caenolestes fuliginosus</i>    | JN413813                         | JN633396             | JN633644      | AY243418 +<br>JN413925 |
| <i>Callithrix jacchus</i>         | Ensembl 69                       | HM765164             | XM_002744350  | Ensembl 65             |
| <i>Caluromys philander</i>        | JN413814                         | JN633392             | JN633640      | AY243419 +<br>JN413926 |
| <i>Camelus bactrianus</i>         | JARL01022906                     | CAOW010325874        | GAEX01036340  | GAEW01012362           |
| <i>Camelus dromedarius</i>        | JWIN01033659                     | GAEA01058922         | JWIN01034128  | JWIN01033039           |
| <i>Camelus ferus</i>              | AGVR01013673                     | AGVR01026070         | AGVR01008536  | AGVR01018504           |
| <i>Canis familiaris</i>           | AJ891051                         | Ensembl 64           | AY011309      | XM_532887              |
| <i>Caperea marginata</i>          | JN413815                         | JN413899             | JN413910      | JN413973               |
| <i>Capra aegagrus</i>             | CBYH010014783                    | CBYH010091596        | CBYH010007839 | CBYH010010202          |
| <i>Capra hircus</i>               | GAAO01004003                     | AJPT01031645         | AJPT01080438  | AJPT01119634           |

| Name                                | A2AB          | Adora3        | ADRB2         | ApoB                         |
|-------------------------------------|---------------|---------------|---------------|------------------------------|
| <i>Capreolus capreolus</i>          | CCMK010312494 | CCMK010261104 | CCMK010105685 | CCMK010190729                |
| <i>Capromys pilorides</i>           | JN413816      | JN633434      | JN633690      | JN414049                     |
| <i>Castor canadensis</i>            | AJ427260      | AY011208      | AY011268      | JN414051                     |
| <i>Cavia aperea</i>                 | AVPZ01000167  | AVPZ01000223  | AVPZ01000667  | AVPZ01000100                 |
| <i>Cavia porcellus</i>              | AAKN02027870  | Ensembl 65    | XM_003477335  | XM_003473159                 |
| <i>Cebus albifrons</i>              | JN413817      | JN633427      | JN633683      | JN414036                     |
| <i>Ceratotherium simum</i>          | JN413818      | AY011244      | AY011304      | JN414030                     |
| <i>Cercartetus nanus</i>            | JN413819      | JN633401      | JN633648      | EU160445 + JN413927          |
| <i>Cercocebus atys</i>              | JZLG01067561  | JZLG01023840  | JZLG01013080  | JZLG01056135                 |
| <i>Cervus taiouanus</i>             | JN413820      | JN633420      | JN413921      | JN413964                     |
| <i>Cheirogaleus medius</i>          | AJ891052      | HM765218      | XXXXXX        | XXXXXX                       |
| <i>Chinchilla lanigera</i>          | AJ427271      | AGCD01033259  | AGCD01015995  | JN414052                     |
| <i>Chlorocebus sabaeus</i>          | AQIB01138632  | HM765096      | AQIB01044353  | AQIB01032695                 |
| <i>Choloepus didactylus</i>         | AJ427375      | AY011192      | AY011253      | XXXXXX                       |
| <i>Choloepus hoffmanni</i>          | ABVD02285944  | AY011191      | AY011252      | JN413958                     |
| <i>Chrysochloris asiatica</i>       | JN413821      | JN633412      | JN633658      | JN413947                     |
| <i>Colobus angolensis</i>           | JYKR01126149  | HM765097      | JYKR01190142  | JYKR01008599                 |
| <i>Condylura cristata</i>           | AJFV01049855  | AY011199      | AY011260      | AJFV01050766                 |
| <i>Craseonycteris thonglongyai</i>  | AY834411      | AY834435      | AY834459      | JN414001                     |
| <i>Cratogeomys castanops</i>        | JN413822      | XXXXXX        | JN633697      | JN414061                     |
| <i>Cricetulus griseus</i>           | PreEnsembl 65 | PreEnsembl 65 | AY011272      | JN414053                     |
| <i>Crocota crocata</i>              | AJ891055      | GU930842      | JN633672      | AF548422 + JN413989          |
| <i>Ctenodactylus gundi</i>          | JN413824      | JN633437      | JN633692      | JN414054                     |
| <i>Ctenomys boliviensis</i>         | JN413825      | JN633438      | JN633693      | JN414055                     |
| <i>Cuniculus taczanowskii</i>       | JN413806      | AY011220      | AY011281      | JN414045                     |
| <i>Cyclopes didactylus</i>          | AJ315943      | JN633418      | JN633663      | JN413961                     |
| <i>Cynocephalus volans</i>          | EU142140      | AF535031      | AF535036      | JN414021                     |
| <i>Cynopterus sphinx</i>            | AJ251181      | GAOV01099534  | GAOV01031639  | XXXXXX                       |
| <i>Dasyprocta punctata</i>          | JN413827      | JN633439      | JN633694      | JN414056                     |
| <i>Dasyypus novemcinctus</i>        | AAGV03209451  | Ensembl 64    | AAGV03109743  | JN413957                     |
| <i>Dasyurus albopunctatus</i>       | JN413828      | JN633410      | JN633656      | JN413928                     |
| <i>Daubentonia madagascariensis</i> | AM050858      | JN633428      | JN633684      | JN414038                     |
| <i>Delphinapterus leucas</i>        | JN413829      | JN413905      | JN413915      | JN413978                     |
| <i>Desmodus rotundus</i>            | AJ419811      | XXXXXX        | AY834446      | XXXXXX                       |
| <i>Didelphis virginiana</i>         | JN413830      | AY011189      | KC113258      | JN413929                     |
| <i>Dinomys branickii</i>            | AM050859      | AY011219      | AY011280      | AY243370 +<br>JN414057       |
| <i>Dipodomys heermanni</i>          | JN413831      | JN633442      | AY011275      | JN414062                     |
| <i>Dipodomys ordii</i>              | ABRO02033545  | Ensembl 65    | ABRO02048509  | Ensembl 65                   |
| <i>Dromiciops gliroides</i>         | JN413832      | JN633394      | JN633642      | AY243423 +<br>JN413930       |
| <i>Dugong dugon</i>                 | Y15947        | JN633415      | JN633661      | AF548410 + JN413953          |
| <i>Echinops telfairi</i>            | Y17692        | AY011201      | AAIY01697372  | JN413945                     |
| <i>Echymipera kalubu</i>            | JN413833      | JN633399      | JN633647      | AY243420 +<br>JN413931       |
| <i>Eidolon helvum</i>               | AWHC01104560  | AWHC01055011  | AWHC01032436  | AWHC01057068                 |
| <i>Elephantulus edwardii</i>        | AMGZ01239109  | AMGZ01196936  | AMGZ01169660  | AMGZ01021947                 |
| <i>Elephantulus rufescens</i>       | JN413834      | AY059668      | AY011265      | AF548408 + JN413948          |
| <i>Elephas maximus</i>              | JN413835      | JN633416      | XXXXXX        | JN413955                     |
| <i>Emballonura atrata</i>           | AJ419810      | AY834418      | AY834442      | JN414002                     |
| <i>Eptesicus fuscus</i>             | ALEH01149381  | ALEH01071172  | ALEH01097379  | ALEH01018924                 |
| <i>Equus asinus</i>                 | JREZ01000530  | JREZ01000141  | JREZ01000329  | JREZ01000059                 |
| <i>Equus caballus</i>               | AAWR02003437  | Ensembl 67    | AY011303      | AAWR02004366<br>thoroughbred |
| <i>Equus przewalskii</i>            | ATBW01057699  | ATBW01011722  | ATBW01026832  | ATBW01057833                 |
| <i>Erethizon dorsatum</i>           | AJ427270      | AY011215      | JN633696      | JN414060                     |
| <i>Erinaceus europaeus</i>          | JN413836      | Ensembl 64    | AANN01328215  | JN414024                     |
| <i>Eschrichtius robustus</i>        | JN413837      | JN413901      | JN413912      | JN413975                     |
| <i>Eubalaena australis</i>          | JN413838      | JN413900      | JN413911      | JN413974                     |
| <i>Eulemur flavifrons</i>           | LGHW01006592  | LGHW01001903  | LGHW01002774  | LGHW01000775                 |
| <i>Eulemur macaco</i>               | LGHX01006484  | LGHX01001886  | LGHX01002748  | LGHX01000770                 |
| <i>Eumops auripendulus</i>          | AY834410      | XXXXXX        | AY834458      | XXXXXX                       |
| <i>Euphractus sexcinctus</i>        | AJ427368      | AY011193      | AY011254      | XXXXXX                       |
| <i>Felis catus</i>                  | AJ251174      | AY011246      | AY011306      | JN413987                     |
| <i>Fossa fossana</i>                | AJ891061      | GU930852      | JN633670      | JN413986                     |
| <i>Fukomys damarensis</i>           | AYUG01118562  | AYUG01140067  | AYUG01097386  | AYUG01080983                 |

| Name                              | A2AB                         | Adora3                       | ADRB2                        | ApoB                         |
|-----------------------------------|------------------------------|------------------------------|------------------------------|------------------------------|
| <i>Furipterus_horrens</i>         | AY834409                     | AY834432                     | AY834456                     | JN414003                     |
| <i>Galeopterus_variegatus</i>     | AJ251182                     | AY011223                     | JN633681                     | JN414022                     |
| <i>Genetta_genetta</i>            | JN413839                     | GU930855                     | XXXXXX                       | JN413998                     |
| <i>Glironia_venusta</i>           | JN413840                     | JN633393                     | JN633641                     | JN413932                     |
| <i>Gorilla_gorilla</i>            | XM_004031413                 | HM765150                     | AY091936                     | Ensembl 65                   |
| <i>Heterocephalus_glaber</i>      | AHKG01028960                 | AHKG01051086                 | AHKG01052864                 | JN414048                     |
| <i>Heterohyrax_brucei</i>         | JN413842                     | JN633414                     | JN633660                     | JN413951                     |
| <i>Hippopotamus_amphibius</i>     | AJ251178                     | AY011238                     | AY011298                     | JN413966                     |
| <i>Hipposideros_commerioni</i>    | AF337538                     | AY834415                     | AY834439                     | JN414004                     |
| <i>Homo_sapiens</i>               | AY548167                     | HM765141                     | AY011291                     | Ensembl 64                   |
| <i>Hoplomys_gymnurus</i>          | JN413843                     | JN633441                     | XXXXXX                       | JN414059                     |
| <i>Hydrochoeris_hydrochaeris</i>  | JN413844                     | AY011218                     | AY011278                     | AY243369 &<br>JN414063       |
| <i>Hydrodamalis_gigas</i>         | consensus                    | Consensus                    | consensus                    | consensus                    |
| <i>Hylobates_lar</i>              | AM050851                     | HM765143                     | XXXXXX                       | XXXXXX                       |
| <i>Hypsiprymnodon_moschatus</i>   | JN413845                     | JN633406                     | JN633652                     | FJ603118 + JN413933          |
| <i>Hystrix_brachyura</i>          | JN413846                     | AY011214                     | AY011273                     | JN414064                     |
| <i>Inia_geoffrensis</i>           | JN413848                     | JN413903                     | JN413914                     | JN413977                     |
| <i>Isodon_macrourus</i>           | JN413849                     | JN633398                     | JN633645                     | EU160446 + JN413934          |
| <i>Jaculus_jaculus</i>            | JN413850                     | JN633440                     | JN633695                     | JN414058                     |
| <i>Kogia_breviceps</i>            | JN413851                     | JN413906                     | JN413917                     | JN413980                     |
| <i>Lama_glama</i>                 | JN413852                     | AY011239                     | AY011299                     | AY243381 +<br>JN413963       |
| <i>Laonastes_aenigmamus</i>       | AM407900                     | JN633447                     | JN633701                     | JN414071                     |
| <i>Lemur_catta</i>                | AJ891067                     | EU342231                     | AY011286                     | AY243380 +<br>JN414041       |
| <i>Leptonychotes_weddellii</i>    | APMU01041373                 | APMU01052847                 | APMU01142111                 | APMU01110148                 |
| <i>Lipotes_vexillifer</i>         | AUPI01145685                 | AUPI01025142                 | AUPI01013957                 | AUPI01105810                 |
| <i>Loxodonta_africana</i>         | JN413853                     | AY011204                     | AY011264                     | AF548406 + JN413956          |
| <i>Macaca_fascicularis</i>        | CAEC01106960                 | HM765105                     | AEHL01364591                 | AEHL01127680                 |
| <i>Macaca_mulatta</i>             | XM_001082230                 | AY011228                     | AY011288                     | XM_001097500                 |
| <i>Macaca_nemestrina</i>          | JZLF01022033                 | HM765109                     | JZLF01052443                 | JZLF01083855                 |
| <i>Macroderma_gigas</i>           | AY834404                     | XXXXXX                       | AY834440                     | XXXXXX                       |
| <i>Macropus_eugenii</i>           | JN413854                     | AY011190                     | ABQO020893080                | FJ603152 + JN413935          |
| <i>Macroselides_proboscideus</i>  | Y12524                       | XXXXXX                       | AY059674                     | XXXXXX                       |
| <i>Macrotis_lagotis</i>           | JN413855                     | XXXXXX                       | JN633646                     | EU369354 + JN413936          |
| <i>Mandrillus_leucophaeus</i>     | JYKQ01234525                 | HM765117                     | JYKQ01105530                 | JYKQ01025986                 |
| <i>Manis_pentadactyla</i>         | JN413856                     | AY011251                     | AY011311                     | JPTV01025261                 |
| <i>Manis_tricuspis</i>            | JN413857                     | JN633424                     | JN633678                     | JN414000                     |
| <i>Marmota_marmota</i>            | CEEU01000064                 | CEEU01000080                 | CEEU01000001                 | CEEU01000007                 |
| <i>Megaderma_lyra</i>             | AF337537                     | AY059670                     | AY059676                     | AF548428 + JN414005          |
| <i>Megaptera_novaeangliae</i>     | JN413858                     | AY011236                     | AY011296                     | JN413971                     |
| <i>Meles_meles</i>                | JN413859                     | GU930868                     | JN633674                     | JN413991                     |
| <i>Mephitis_mephitis</i>          | JN413860                     | GU930860                     | JN633673                     | JN413990                     |
| <i>Mesocricetus_auratus</i>       | FM162044                     | APMT01106216                 | APMT01089351                 | APMT01127824                 |
| <i>Mesoplodon_bidens</i>          | JN413861                     | JN413902                     | JN413913                     | JN413976                     |
| <i>Microcebus_murinus</i>         | AM050858                     | GU230981                     | EU142144                     | JN414037                     |
| <i>Microtus_agrestis_Northern</i> | WGS specimen from<br>England | WGS specimen from<br>England | WGS specimen from<br>England | WGS specimen from<br>England |
|                                   | LIQJ01000465                 | LIQJ01012119                 | LIQJ01003279                 | LIQJ01001469                 |
| <i>Microtus_ochrogaster</i>       | AHZW01122540                 | AHZW01160872                 | AHZW01010266                 | AHZW01070319                 |
| <i>Monodelphis_domestica</i>      | AAFR03003568                 | Ensembl 66                   | XM_001380743                 | XM_001377551                 |
| <i>Mus_musculus</i>               | AF332050                     | AY011211                     | AY011270                     | NM_009693                    |
| <i>Mustela_putorius</i>           | PreEnsembl 65                | PreEnsembl 65                | PreEnsembl 65                | EF987528                     |
| <i>Myocastor_coypus</i>           | JN413864                     | JN633435                     | AY011279                     | JX515307                     |
| <i>Myodes_glareolus</i>           | AJ891053                     | LIPI01004679                 | LIPI01010950                 | LIPI01003054                 |
| <i>Myotis_brandtii</i>            | ANKR01172987                 | ANKR01171337                 | ANKR01227161                 | ANKR01258291                 |
| <i>Myotis_daubentonii</i>         | AF337540                     | XXXXXX                       | AY834451                     | XXXXXX                       |
| <i>Myotis_davidii</i>             | ALWT01081721                 | ALWT01098650                 | ALWT01127348                 | ALWT01141937                 |
| <i>Myotis_lucifugus</i>           | JN413865                     | Ensembl 64                   | Ensembl 66                   | JN414020                     |
| <i>Myrmecobius_fasciatus</i>      | JN413866                     | JN633411                     | JN633657                     | FJ603113                     |
| <i>Myrmecophaga_tridactyla</i>    | AJ427373                     | AY011196                     | AY011257                     | JN413960                     |
| <i>Mystacina_tuberculata</i>      | AY245423                     | AY834431                     | AY834455                     | JN414009                     |
| <i>Myzopoda_aurita</i>            | AY834408                     | AY834428                     | AY834452                     | JN414010                     |
| <i>Nandinia_binotata</i>          | JN413867                     | GU930857                     | XXXXXX                       | JN413992                     |
| <i>Nannospalax_ehrenbergi</i>     | AJ891078                     | JN633448                     | JN633702                     | JN414072                     |

| Name                             | A2AB                                                                                                        | Adora3        | ADRB2                                                                                              | ApoB                   |
|----------------------------------|-------------------------------------------------------------------------------------------------------------|---------------|----------------------------------------------------------------------------------------------------|------------------------|
| <i>Nannospalax_galili</i>        | AXCS01011252                                                                                                | AXCS01076154  | AXCS01098101                                                                                       | AXCS01017308           |
| <i>Nasalis_larvatus</i>          | JMHX01219485 and<br>JMHX01017966                                                                            | HM765120      | JMHX01189631                                                                                       | JMHX01319542           |
| <i>Natalus_stramineus</i>        | AJ419815                                                                                                    | AY834433      | AY834457                                                                                           | JN414011               |
| <i>Noctilio_albiventris</i>      | AJ419812                                                                                                    | AY834424      | AY834448                                                                                           | JN414012               |
| <i>Nomascus_leucogenys</i>       | ADVF01128004 and<br>TI# 2039827488<br>(change call to two Gs<br>instead of three Gs at<br>806-808 of trace) | HM765144      | Trace files<br>gnl ti 2038745608,<br>gnl ti 2100591954,<br>gnl ti 1897261872,<br>gnl ti 2048646151 | Ensembl 65             |
| <i>Notoryctes_typhlops</i>       | JN413868                                                                                                    | JN633395      | JN633643                                                                                           | AY243424 +<br>JN413937 |
| <i>Nycteris_thebaica</i>         | AJ419808                                                                                                    | AY011235      | AY011295                                                                                           | JN414013               |
| <i>Nycticebus_coucang</i>        | AJ251186                                                                                                    | EU342236      | JN633686                                                                                           | JN414042               |
| <i>Nyctimene_albiventer</i>      | AJ419805                                                                                                    | AY834413      | AY834437                                                                                           | JN414016               |
| <i>Ochotona_princeps</i>         | AJ315938                                                                                                    | Ensembl 64    | AAYZ01111579                                                                                       | AF548414 + JN414023    |
| <i>Octodon_degus</i>             | AJSA01092111                                                                                                | AJSA01171160  | AJSA01077598                                                                                       | AJSA01045617           |
| <i>Octodontomys_gliroides</i>    | JN413869                                                                                                    | JN633444      | XXXXXX                                                                                             | JN414066               |
| <i>Odobenus_rosmarus</i>         | JN413870                                                                                                    | GU167606      | ANOP01021158                                                                                       | JN413993               |
| <i>Okapia_johnstoni</i>          | JN413871                                                                                                    | AY011242      | AY011302                                                                                           | JN413965               |
| <i>Orcinus_orca_Norway</i>       | ANOL01048305                                                                                                | ANOL01003137  | ANOL01056286                                                                                       | ANOL01038728           |
| <i>Orycteropus_ afer</i>         | JQ965670                                                                                                    | AY011206      | AY011266                                                                                           | JN413950               |
| <i>Oryctolagus_cuniculus</i>     | Y15946                                                                                                      | NM_001082058  | Ensembl 65                                                                                         | Ensembl 66             |
| <i>Otolemur_garnettii</i>        | JN413872                                                                                                    | KJ419053      | Ensembl 65                                                                                         | JN414039               |
| <i>Ovis_aries</i>                | XM_004006169                                                                                                | PreEnsembl 65 | EU707942                                                                                           | AMGL01075676           |
| <i>Pan_paniscus</i>              | AJFE01015177                                                                                                | HM765151      | AJFE01102350                                                                                       | AJFE01094772           |
| <i>Pan_troglodytes</i>           | Ensembl 66                                                                                                  | HM765153      | GU373723                                                                                           | Ensembl 65             |
| <i>Panthera_tigris</i>           | ATCQ01055728                                                                                                | ATCQ01021669  | ATCQ01122148                                                                                       | ATCQ01048137           |
| <i>Pantholops_hodgsonii</i>      | Scaffold 175                                                                                                | Scaffold 575  | Scaffold 669                                                                                       | Scaffold 630           |
| <i>Papio_anubis</i>              | AHZZ01038019                                                                                                | AHZZ01011703  | NC_018157                                                                                          | AHZZ01016761           |
| <i>Papio_hamadryas</i>           | PreEnsembl 65                                                                                               | HM765122      | PreEnsembl 65                                                                                      | PreEnsembl 65          |
| <i>Pecari_tajacu</i>             | JN413873                                                                                                    | JN633422      | JN633666                                                                                           | JN413969               |
| <i>Pedetes_capensis</i>          | JN413874                                                                                                    | AY011210      | JN633699                                                                                           | JN414067               |
| <i>Peromyscus_maniculatus</i>    | AYHN01080247                                                                                                | AYHN01079709  | AYHN01072238                                                                                       | AYHN01055053           |
| <i>Petaurus_breviceps</i>        | JN413875                                                                                                    | JN633402      | JN633649                                                                                           | JN413938               |
| <i>Petromus_typicus</i>          | AJ427268                                                                                                    | JN633445      | JN633700                                                                                           | JN414068               |
| <i>Phascolarctos_cinereus</i>    | JN413877                                                                                                    | JN633404      | JN633651                                                                                           | AY243421 +<br>JN413939 |
| <i>Phoca_vitulina</i>            | JN413878                                                                                                    | GU930874      | JN633675                                                                                           | JN413995               |
| <i>Phocoena_phocoena</i>         | JN413879                                                                                                    | JN413905      | JN413916                                                                                           | JN413979               |
| <i>Physeter_macrocephalus</i>    | AJ427417                                                                                                    | JN413907      | JN413918                                                                                           | JN413981               |
| <i>Pithecia_pithecia</i>         | AM050857                                                                                                    | HM765215      | XXXXXX                                                                                             | XXXXXX                 |
| <i>Platanista_minor</i>          | JN413880                                                                                                    | JN413908      | JN413919                                                                                           | JN413982               |
| <i>Podogymnura_truei</i>         | JN413881                                                                                                    | JN633426      | JN633682                                                                                           | JN414025               |
| <i>Pongo_abelii</i>              | Ensembl 66                                                                                                  | XM_002810439  | XM_002816061                                                                                       | Ensembl 66             |
| <i>Pontoporia_blainvillei</i>    | JN413882                                                                                                    | JN413909      | JN413920                                                                                           | JN413983               |
| <i>Prionodon_linsang</i>         | JN413883                                                                                                    | GU930841      | JN633668                                                                                           | JN413984               |
| <i>Procavia_capensis</i>         | ABRQ01384162                                                                                                | AY011203      | AY011263                                                                                           | JN413952               |
| <i>Procyon_lotor</i>             | JN413884                                                                                                    | GU930881      | JN633676                                                                                           | JN413996               |
| <i>Propithecus_coquereli</i>     | JZKE01070948                                                                                                | JZKE01235059  | JZKE01231911                                                                                       | JZKE01187754           |
| <i>Propithecus_verreauxi</i>     | AJ891076                                                                                                    | HM765225      | XXXXXX                                                                                             | XXXXXX                 |
| <i>Pseudochirops_cupreus</i>     | JN413885                                                                                                    | JN633407      | JN633653                                                                                           | FJ603114 + JN413940    |
| <i>Pteronotus_parnellii</i>      | AY245422                                                                                                    | AY834429      | AY834453                                                                                           | JN414008               |
| <i>Pteropus_alecto</i>           | ALWS01030414                                                                                                | ALWS01087411  | ALWS01012500                                                                                       | ALWS01035155           |
| <i>Pteropus_giganteus</i>        | JN413886                                                                                                    | AY011233      | AY011293                                                                                           | JN414015               |
| <i>Pteropus_vampyrus</i>         | Ensembl 64                                                                                                  | ABRP02010652  | Ensembl 65                                                                                         | Ensembl 65             |
| <i>Ptilocercus_lowii</i>         | JN413887                                                                                                    | EU213052      | EU142145                                                                                           | JN414032               |
| <i>Rattus_norvegicus</i>         | Ensembl 66                                                                                                  | NM_012896     | AY011271                                                                                           | AY321317               |
| <i>Rhinolophus_craghi</i>        | AJ419806                                                                                                    | AY834414      | AY834438                                                                                           | AY243371 +<br>JN414017 |
| <i>Rhinolophus_ferrumequinum</i> | AWHA01049021                                                                                                | AWHA01179609  | AWHA01107390                                                                                       | AWHA01248641           |
| <i>Rhinopithecus_roxellana</i>   | JABR01021146                                                                                                | JABR01105597  | JABR01086911                                                                                       | JABR01080156           |
| <i>Rhinopoma_hardwickii</i>      | AJ419809                                                                                                    | AY834417      | AY834441                                                                                           | JN414018               |
| <i>Rhogeessa_tumida</i>          | AJ419814                                                                                                    | XXXXXX        | AY834450                                                                                           | XXXXXX                 |
| <i>Rhynchocyon_petersi</i>       | JN413888                                                                                                    | JN633413      | JN633659                                                                                           | JN413949               |
| <i>Rhyncholestes_raphanurus</i>  | JN413889                                                                                                    | JN633397      | XXXXXX                                                                                             | AY243432 +JN413941     |

| Name                                 | A2AB              | Adora3       | ADRB2         | ApoB                   |
|--------------------------------------|-------------------|--------------|---------------|------------------------|
| <i>Saccopteryx_bilineata</i>         | JN413890          | JN633425     | XXXXXX        | XXXXXX                 |
| <i>Saimiri_boliviensis</i>           | PreEnsembl 66     | HM765204     | PreEnsembl 66 | PreEnsembl 66          |
| <i>Sarcophilus_harrisii</i>          | Ensembl 66        | Ensembl 65   | Ensembl 65    | Ensembl 65             |
| <i>Solenodon_paradoxus</i>           | AY530081          | AY451970     | AY530067      | JN414026               |
| <i>Sorex_araneus</i>                 | AALT02085723      | AY011200     | AY011261      | JN414027               |
| <i>Spermophilus_tridecemlineatus</i> | AGTP01102144      | Ensembl 64   | PreEnsembl 66 | PreEnsembl 66          |
| <i>Suricata_suricatta</i>            | AJ891080          | GU930846     | JN633671      | JN413988               |
| <i>Sus_scrofa</i>                    | DQ182110          | LIDP01000004 | AY011301      | JN413968               |
| <i>Tadarida_brasiliensis</i>         | AF337542          | AY059669     | JN633680      | AF548430 + JN414007    |
| <i>Talpa_altaica</i>                 | JN413891          | AY011198     | AY011259      | JN414028               |
| <i>Tamias_striatus</i>               | JN413847          | AY011207     | AY011267      | JN414069               |
| <i>Tapirus_indicus</i>               | JN413892          | AY011245     | AY011305      | JN414031               |
| <i>Tarsipes_rostratus</i>            | JN413893          | JN633408     | JN633654      | FJ603116 + JN413942    |
| <i>Tarsius_bancanus</i>              | AJ891081          | AY011226     | XXXXXX        | XXXXXX                 |
| <i>Tarsius_syrichta</i>              | ABRT02375834      | AF535033     | ABRT02404989  | JN414043               |
| <i>Thryonomys_swinderianus</i>       | AJ427267          | JN633446     | XXXXXX        | JN414070               |
| <i>Tragulus_napu</i>                 | JN413894          | JN633423     | JN633667      | JN413970               |
| <i>Trichechus_manatus</i>            | AJ251109          | AHIN01076245 | AHIN01106093  | JN413954               |
| <i>Trichosurus_vulpecula</i>         | JN413895          | JN633403     | JN633650      | JN413943               |
| <i>Tupaia_belangeri</i>              | AY150333          | ALAR01059806 | Ensembl 65    | ALAR01209648           |
| <i>Tupaia_minor</i>                  | JN413896          | HM765254     | AY011285      | JN414033               |
| <i>Tursiops_truncatus</i>            | JN413897          | AY011237     | AY011297      | JN413972               |
| <i>Urogale_everetti</i>              | EU142141          | XXXXXX       | AF535035      | XXXXXX                 |
| <i>Ursus_americanus</i>              | black bear genome | genome       | genome        | genome                 |
| <i>Ursus_arctos</i>                  | brown bear genome | genome       | AY011310      | genome                 |
| <i>Ursus_maritimus</i>               | Scaffold 1        | scaffold 36  | Scaffold 4    | Scaffold 1             |
| <i>Vicugna_pacos</i>                 | ABRR02049478      | ABRR02145625 | Ensembl 65    | ABRR02007676           |
| <i>Vombatus_ursinus</i>              | JN413898          | JN633409     | JN633655      | AY243429 +<br>JN413944 |
| <i>Allenopithecus_nigroviridis</i>   | XXXXXX            | HM765081     | XXXXXX        | XXXXXX                 |
| <i>Alouatta_sara</i>                 | XXXXXX            | HM765174     | XXXXXX        | XXXXXX                 |
| <i>Anolis_carolinensis</i>           | XXXXXX            | Ensembl 73   | Ensembl 66    | Ensembl 66             |
| <i>Cacajao_calvus</i>                | XXXXXX            | HM765187     | XXXXXX        | XXXXXX                 |
| <i>Callimico_goeldii</i>             | XXXXXX            | HM765160     | AY011290      | XXXXXX                 |
| <i>Cercocebus_chrysogaster</i>       | XXXXXX            | HM765082     | XXXXXX        | XXXXXX                 |
| <i>Cercopithecus_albogularis</i>     | XXXXXX            | HM765084     | XXXXXX        | XXXXXX                 |
| <i>Cercopithecus_diana</i>           | XXXXXX            | HM765087     | XXXXXX        | XXXXXX                 |
| <i>Cynopterus_brachyotis</i>         | XXXXXX            | KP175743     | AY834436      | New sequence           |
| <i>Erinaceus_concolor</i>            | XXXXXX            | AY011197     | XXXXXX        | XXXXXX                 |
| <i>Erythrocebus_patas</i>            | XXXXXX            | HM765100     | XXXXXX        | XXXXXX                 |
| <i>Eulemur_mongoz</i>                | XXXXXX            | EU342227     | XXXXXX        | XXXXXX                 |
| <i>Galago_senegalensis</i>           | XXXXXX            | HM765246     | XXXXXX        | XXXXXX                 |
| <i>Gallus_gallus</i>                 | XXXXXX            | Ensembl 73   | AADN03013442  | Ensembl 66             |
| <i>Graphiurus_murinus</i>            | XXXXXX            | JN633443     | JN633698      | JN414065               |
| <i>Haplemur_griseus</i>              | XXXXXX            | HM765235     | XXXXXX        | XXXXXX                 |
| <i>Hylobates_agilis</i>              | XXXXXX            | HM765142     | XXXXXX        | FJ648359               |
| <i>Hylobates_muelleri</i>            | XXXXXX            | HM765145     | XXXXXX        | FJ648360               |
| <i>Lagothrix_lagotricha</i>          | XXXXXX            | HM765159     | XXXXXX        | XXXXXX                 |
| <i>Leontopithecus_rosalia</i>        | XXXXXX            | HM765169     | XXXXXX        | XXXXXX                 |
| <i>Macaca_fuscata</i>                | XXXXXX            | HM765106     | XXXXXX        | XXXXXX                 |
| <i>Miopithecus_ogouensis</i>         | XXXXXX            | HM765119     | XXXXXX        | XXXXXX                 |
| <i>Moschus_moschiferus</i>           | XXXXXX            | JN633421     | JN633665      | XXXXXX                 |
| <i>Neovison_vison</i>                | XXXXXX            | GU930869     | XXXXXX        | AB193421               |
| <i>Nomascus_concolor</i>             | XXXXXX            | AY011229     | AY011289      | XXXXXX                 |
| <i>Ochotona_hyperborea</i>           | XXXXXX            | AY011222     | AY011283      | XXXXXX                 |
| <i>Ornithorhynchus_anatinus</i>      | XXXXXX            | XM_001517692 | Ensembl 66    | NM_001242755           |
| <i>Panthera_onca</i>                 | XXXXXX            | AY011248     | AY011308      | GU930887               |
| <i>Pongo_pygmaeus</i>                | XXXXXX            | HM765154     | AY091937      | AY091955               |
| <i>Propithecus_diadema</i>           | XXXXXX            | EU342238     | XXXXXX        | XXXXXX                 |
| <i>Pygathrix_nemaeus</i>             | XXXXXX            | HM765127     | XXXXXX        | XXXXXX                 |
| <i>Rousettus_lanosus</i>             | XXXXXX            | KP175742     | AY011294      | XXXXXX                 |
| <i>Saguinus_fuscicollis</i>          | XXXXXX            | HM765197     | XXXXXX        | XXXXXX                 |
| <i>Saimiri_oerstedii</i>             | XXXXXX            | HM765205     | XXXXXX        | XXXXXX                 |
| <i>Saimiri_sciureus</i>              | XXXXXX            | HM765206     | XXXXXX        | XXXXXX                 |
| <i>Semnopithecus_entellus</i>        | XXXXXX            | HM765131     | XXXXXX        | XXXXXX                 |
| <i>Sylvilagus_floridanus</i>         | XXXXXX            | AY011221     | XXXXXX        | XXXXXX                 |

| Name                            | A2AB   | Adora3     | ADRB2        | ApoB                |
|---------------------------------|--------|------------|--------------|---------------------|
| <i>Symphalangus syndactylus</i> | XXXXXX | HM765149   | XXXXXX       | XXXXXX              |
| <i>Tachyglossus aculeatus</i>   | XXXXXX | JN633391   | JN633639     | AF548433 + JN413922 |
| <i>Taeniopygia guttata</i>      | XXXXXX | Ensembl 73 | Ensembl 66   | ABQF01024903        |
| <i>Thyroptera tricolor</i>      | XXXXXX | AY834430   | AY834454     | JN414019            |
| <i>Trachypithecus francoisi</i> | XXXXXX | HM765136   | XXXXXX       | XXXXXX              |
| <i>Tupaia glis</i>              | XXXXXX | HM765253   | XXXXXX       | XXXXXX              |
| <i>Tamandua tetradactyla</i>    | XXXXXX | XXXXXX     | AY011256     | AF548426            |
| <i>Xenopus tropicalis</i>       | XXXXXX | XXXXXX     | AAMC02011645 | AAMC02034187        |

| Name                              | APP                             | ATP7A         | BCHE          | BDNF                                 |
|-----------------------------------|---------------------------------|---------------|---------------|--------------------------------------|
| <i>Abrocoma bennettii</i>         | JN633553                        | JN633742      | JN633041      | XXXXXX                               |
| <i>Acinonyx jubatus</i>           | DQ081744                        | LLWD01001016  | LLWD01001150  | GU930974 gene                        |
| <i>Acrobates pygmaeus</i>         | JN633523                        | XXXXXX        | JN632975      | JN633347                             |
| <i>Aepyprymnus rufescens</i>      | JN633528                        | JN633716      | JN632980      | JN633352                             |
| <i>Ailuropoda melanoleuca</i>     | XM_002920065                    | GU930973      | ACTA01088269  | GU931015                             |
| <i>Ailurus fulgens</i>            | GU930934                        | GU930967      | JN633006      | GU931010                             |
| <i>Amblysomus hottentotus</i>     | AY059677                        | AY059681      | JN632986      | AY059685                             |
| <i>Anomalurus beecroftii</i>      | JN633554                        | JN633743      | XXXXXX        | JN633380                             |
| <i>Anoura geoffroyi</i>           | AY834471                        | AY834495      | XXXXXX        | AY834519 gene                        |
| <i>Antilocapra americana</i>      | JN633541                        | JN633730      | JN414106      | JN633366                             |
| <i>Antrozous pallidus</i>         | AY834473                        | AY834497      | XXXXXX        | AY834521 gene                        |
| <i>Aotus nancymae</i>             | HM764648                        | JYKP01063745  | HM764104      | JYKP01046398                         |
| <i>Aplodontia rufa</i>            | JN633555                        | JN633744      | XXXXXX        | JN633381                             |
| <i>Apodemus sylvaticus</i>        | LIPJ01022002                    | LIPJ01010472  | LIPJ01007940  | LIPJ01014057                         |
| <i>Arctocephalus forsteri</i>     | GU930929                        | GU930962      | JN633013      | JN633372                             |
| <i>Artibeus jamaicensis</i>       | AY011355                        | KC783007      | JN633025      | AY011482                             |
| <i>Ateles fusciceps</i>           | AY011351                        | AY011414      | EU142156      | EU142177                             |
| <i>Balaena mysticetus</i>         | scaffold 795                    | Scaffold 333  | scaffold 2186 | EU444888 (identical to scaffold 869) |
| <i>Balaenoptera acutorostrata</i> | ATDI01080418                    | EU444960      | ATDI01131101  | EU444885                             |
| <i>Balaenoptera bonaerensis</i>   | BAUQ01234463                    | EU444959      | BAUQ01323611  | EU444884                             |
| <i>Bison bison</i>                | JPYT01285900                    | JPYT01116553  | JPYT01775816  | JPYT01253750                         |
| <i>Bos grunniens</i>              | AGSK01127816                    | AGSK01015525  | AGSK01071578  | AGSK01033912                         |
| <i>Bos indicus</i>                | AGFL01000647                    | XXXXXX        | AGFL01007467  | AGFL01132240                         |
| <i>Bos taurus</i>                 | Ensembl 66                      | NM_001192852  | NM_001076906  | Ensembl 65                           |
| <i>Bradypus tridactylus</i>       | JN633539                        | JN633728      | JN632994      | JN633364                             |
| <i>Bubalus bubalis</i>            | ACZF020005951 and ACZF020005950 | AWWX01608363  | AWWX01595613  | AWWX01623625                         |
| <i>Caenolestes fuliginosus</i>    | JN633519                        | JN633708      | JN632971      | JN633343                             |
| <i>Callithrix jacchus</i>         | HM764635                        | XM_002763026  | HM764113      | Ensembl 65                           |
| <i>Caluromys philander</i>        | JN633516                        | JN633705      | JN632967      | JN633340                             |
| <i>Camelus bactrianus</i>         | CAOW010154352                   | CAOW010765556 | CAOW010115380 | JARL01029650                         |
| <i>Camelus dromedarius</i>        | GAEA01056326                    | JWIN01030507  | JWIN01029746  | GQ487619 gene                        |
| <i>Camelus ferus</i>              | AGVR01033547                    | AGVR01063826  | AGVR01028033  | AGVR01060768                         |
| <i>Canis familiaris</i>           | AY011372                        | AY011436      | XM_545267     | AY011499                             |
| <i>Caperea marginata</i>          | JN414074                        | JN414084      | JN414095      | JN414108                             |
| <i>Capra aegagrus</i>             | CBYH010043162                   | CBYH010061561 | CBYH010056935 | CBYH010027878                        |
| <i>Capra hircus</i>               | AJPT01000995                    | AJPT01240857  | AJPT01009411  | AJPT01151864                         |
| <i>Capreolus capreolus</i>        | CCMK010130799                   | CCMK010123070 | CCMK010037175 | CCMK010071712                        |
| <i>Capromys pilorides</i>         | XXXXXX                          | JN633745      | JN633044      | XXXXXX                               |
| <i>Castor canadensis</i>          | AY011331                        | AY011394      | EU142150      | AY011458                             |
| <i>Cavia aperea</i>               | AVPZ01000478                    | XXXXXX        | AVPZ01000267  | AVPZ01000722                         |
| <i>Cavia porcellus</i>            | Ensembl 66                      | AAKN02029756  | Ensembl 64    | AAKN02047042                         |
| <i>Cebus albifrons</i>            | JN633549L                       | JN633738      | JN633037      | JN633376                             |
| <i>Ceratotherium simum</i>        | AY011367                        | AY011431      | AKZM01014441  | AY011494                             |
| <i>Cercartetus nanus</i>          | JN633524                        | JN633712      | JN632976      | JN633348                             |
| <i>Cercocebus atys</i>            | JZLG01039664                    | JZLG01027315  | JZLG01073659  | JZLG01041771                         |
| <i>Cervus taiouanus</i>           | JN633542                        | JN633731      | JN632998      | JN633367                             |
| <i>Cheirogaleus medius</i>        | HM764681                        | XXXXXX        | HM764123      | HM763870                             |
| <i>Chinchilla lanigera</i>        | JN633556                        | JN633747      | JN633046      | AGCD01055340                         |
| <i>Chlorocebus sabaeus</i>        | HM764570                        | AQIB01153006  | HM764144      | AQIB01085023                         |
| <i>Choloepus didactylus</i>       | AY011314                        | AY011378      | XXXXXX        | AY011442                             |
| <i>Choloepus hoffmanni</i>        | AY011313                        | AY011377      | ABVD02190002  | AY011441                             |

| Name                                | APP          | ATP7A        | BCHE          | BDNF                                                         |
|-------------------------------------|--------------|--------------|---------------|--------------------------------------------------------------|
| <i>Chrysochloris asiatica</i>       | JN633534     | JN633723     | JN632987      | JN633359                                                     |
| <i>Colobus angolensis</i>           | JYKR01169642 | JYKR01085094 | JYKR01073962  | JYKR01035947                                                 |
| <i>Condylura cristata</i>           | AY011321     | AY011385     | AJFV01007579  | AY011449                                                     |
| <i>Craseonycteris thonglongyai</i>  | KP175773     | AY834507     | XXXXXX        | KP175839                                                     |
| <i>Cratogeomys castanops</i>        | JN633561     | JN633753     | JN633054      | XXXXXX                                                       |
| <i>Cricetulus griseus</i>           | AY011336     | AY011399     | PreEnsembl 66 | AY011463 gene                                                |
| <i>Crocota crocuta</i>              | DQ081768     | DQ082629     | JN633009      | JN633371                                                     |
| <i>Ctenodactylus gundi</i>          | JN633557     | JN633749     | JN633047      | JN633384                                                     |
| <i>Ctenomys boliviensis</i>         | JN633558     | JN633750     | JN633048      | JN633385                                                     |
| <i>Cuniculus taczanowskii</i>       | AY011344     | AY011407     | JN633042      | AY011471                                                     |
| <i>Cyclopes didactylus</i>          | JN633540     | JN633729     | JN632996      | XXXXXX                                                       |
| <i>Cynocephalus volans</i>          | AF535039     | AF535043     | EU142154      | AF535048                                                     |
| <i>Cynopterus sphinx</i>            | XXXXXX       | GAOV01061430 | GAOV01106078  | GAOV01147513 (5' fragment) and<br>GAOV01147512 (3' fragment) |
| <i>Dasyprocta punctata</i>          | JN633559     | JN633751     | JN633049      | XXXXXX                                                       |
| <i>Dasypus novemcinctus</i>         | #NAME?       | AAGV03191891 | AAGV03254222  | Ensembl 65                                                   |
| <i>Dasyurus albopunctatus</i>       | JN633532     | JN633721     | JN632984      | JN633357                                                     |
| <i>Daubentonia madagascariensis</i> | JN633550     | JN633739     | JN633038      | JN633377                                                     |
| <i>Delphinapterus leucas</i>        | JN414078     | GQ487604     | JN414100      | JN414113                                                     |
| <i>Desmodus rotundus</i>            | AY834470     | AY834494     | XXXXXX        | AY834518 gene                                                |
| <i>Didelphis virginiana</i>         | AY059678     | AY011375     | JN632966      | AY011439                                                     |
| <i>Dinomys branickii</i>            | AY011343     | AY011406     | JN633050      | AY011470                                                     |
| <i>Dipodomys heermanni</i>          | AY011339     | AY011402     | XXXXXX        | AY011466                                                     |
| <i>Dipodomys ordii</i>              | Ensembl 66   | ABRO02056755 | ABRO02025253  | Ensembl 64                                                   |
| <i>Dromiciops gliroides</i>         | EF104986     | EF104987     | JN632969      | EF104989                                                     |
| <i>Dugong dugon</i>                 | JN633537     | JN633726     | JN632991      | KR827244 + 3 Ns filled in based on<br>KR827247               |
| <i>Echinops telfairi</i>            | AY011323     | AY011387     | AAIY01683518  | AY059686                                                     |
| <i>Echymipera kalubu</i>            | JN633522     | JN633711     | JN632974      | JN633346                                                     |
| <i>Eidolon helvum</i>               | AWHC01281653 | XXXXXX       | AWHC01277175  | AWHC01187761                                                 |
| <i>Elephantulus edwardii</i>        | AMGZ01200194 | AMGZ01256578 | AMGZ01135699  | AMGZ01061901                                                 |
| <i>Elephantulus rufescens</i>       | AY011328     | AY011391     | KC113259      | AY011455                                                     |
| <i>Elephas maximus</i>              | JN633538     | JN633727     | JN632993      | JN633363                                                     |
| <i>Emballonura atrata</i>           | AY834466     | AY834490     | XXXXXX        | AY834514 gene                                                |
| <i>Eptesicus fuscus</i>             | ALEH01062593 | ALEH01141195 | ALEH01039605  | ALEH01079717                                                 |
| <i>Equus asinus</i>                 | JREZ01000436 | JREZ01000574 | JREZ01000432  | JREZ01000081                                                 |
| <i>Equus caballus</i>               | AY011366     | AY011430     | NM_001081850  | AY011493                                                     |
| <i>Equus przewalskii</i>            | ATBW01010128 | ATBW01089250 | ATBW01024171  | ATBW01002804                                                 |
| <i>Erethizon dorsatum</i>           | AY011338     | AY011401     | JN633053      | AY011465                                                     |
| <i>Erinaceus europaeus</i>          | AMDU01058631 | Ensembl 66   | AMDU01091458  | Ensembl 65                                                   |
| <i>Eschrichtius robustus</i>        | XXXXXX       | JN414086     | JN414097      | JN414110                                                     |
| <i>Eubalaena australis</i>          | JN414075     | JN414085     | JN414096      | JN414109                                                     |
| <i>Eulemur flavifrons</i>           | HM764695     | LGHW01005725 | LGHW01003220  | LGHW01003586                                                 |
| <i>Eulemur macaco</i>               | HM764694     | LGHX01005636 | LGHX01003186  | LGHX01003545                                                 |
| <i>Eumops auripendulus</i>          | AY834482     | AY834506     | XXXXXX        | AY834530 gene                                                |
| <i>Euphractus sexcinctus</i>        | AY011315     | AY011379     | XXXXXX        | AY011443 gene                                                |
| <i>Felis catus</i>                  | DQ081730     | AY011433     | NM_001009364  | AY011496                                                     |
| <i>Fossa fossana</i>                | GU930912     | GU930945     | JN633007      | GU930988                                                     |
| <i>Fukomys damarensis</i>           | AYUG01146101 | AYUG01125727 | AYUG01078201  | AYUG01123754                                                 |
| <i>Furipterus horrens</i>           | AY834480     | KM361944     | XXXXXX        | AY834528                                                     |
| <i>Galeopterus variegatus</i>       | AY011347     | AY011410     | EU142153      | AY011474                                                     |
| <i>Genetta genetta</i>              | DQ081772     | DQ082633     | JN633017      | GU930990                                                     |
| <i>Glironia venusta</i>             | JN633517     | JN633706     | JN632968      | JN633341                                                     |
| <i>Gorilla gorilla</i>              | HM764624     | Ensembl 64   | HM764176      | HM763827                                                     |
| <i>Heterocephalus glaber</i>        | AY011340     | AY011403     | JN633043      | AFSB01100387                                                 |
| <i>Heterohyrax brucei</i>           | JN633536     | JN633725     | JN632990      | JN633361                                                     |
| <i>Hippopotamus amphibius</i>       | AY011361     | AY011425     | JN633000      | AY011488                                                     |
| <i>Hipposideros commersoni</i>      | AY834463     | AY834487     | JN633020      | AY834511                                                     |
| <i>Homo sapiens</i>                 | AY011354     | AY011418     | EU142157      | AY011481                                                     |
| <i>Hoplomys gymnurus</i>            | XXXXXX       | JN633752     | JN633052      | XXXXXX                                                       |
| <i>Hydrochoeris hydrochaeris</i>    | AY011342     | AY011405     | JN633055      | AY011469                                                     |
| <i>Hydrodamalis gigas</i>           | consensus    | Consensus    | consensus     | Consensus                                                    |
| <i>Hylobates lar</i>                | HM764617     | FJ648398     | HM764136      | HM763822                                                     |

| Name                              | APP                                                  | ATP7A                                        | BCHE                                         | BDNF                                                                 |
|-----------------------------------|------------------------------------------------------|----------------------------------------------|----------------------------------------------|----------------------------------------------------------------------|
| <i>Hypsiprymnodon moschatus</i>   | JN633529                                             | XXXXXX                                       | JN632981                                     | JN633353                                                             |
| <i>Hystrix brachyura</i>          | AY011337                                             | AY011400                                     | JN633056                                     | AY011464                                                             |
| <i>Inia geoffrensis</i>           | JN414077                                             | JN414088                                     | JN414099                                     | JN414112                                                             |
| <i>Isoodon macrourus</i>          | JN633520                                             | JN633709                                     | JN632973                                     | JN633344                                                             |
| <i>Jaculus jaculus</i>            | AKZC01077781                                         | AKZC01253477                                 | JN633051                                     | AKZC01162010                                                         |
| <i>Kogia breviceps</i>            | JN414080                                             | JN414091                                     | JN414102                                     | JN414115                                                             |
| <i>Lama glama</i>                 | AY011362                                             | AY011426                                     | JN632997                                     | AY011489                                                             |
| <i>Laonastes aenigmamus</i>       | JN633566                                             | JN633758                                     | JN633061                                     | JN633388                                                             |
| <i>Lemur catta</i>                | AY011349                                             | AY011412                                     | EU142155                                     | AY011476                                                             |
| <i>Leptonychotes weddellii</i>    | GU167656                                             | APMU01001564                                 | APMU01012386                                 | GU167728 gene                                                        |
| <i>Lipotes vexillifer</i>         | AUPI01123281                                         | AUPI01012971                                 | AUPI01007093                                 | AUPI01095792                                                         |
| <i>Loxodonta africana</i>         | AY011326                                             | AY011390                                     | Ensembl 66                                   | AY011453                                                             |
| <i>Macaca fascicularis</i>        | HM764578                                             | AEHL01430186                                 | HM764148                                     | HM763789                                                             |
| <i>Macaca mulatta</i>             | AY011352                                             | AY011415                                     | XM_002808333                                 | AY011478                                                             |
| <i>Macaca nemestrina</i>          | JZLF01066781                                         | JZLF01005896                                 | HM764166                                     | JZLF01042704                                                         |
| <i>Macroderma gigas</i>           | AY834464                                             | AY834488                                     | XXXXXX                                       | AY834512 gene                                                        |
| <i>Macropus eugenii</i>           | AY011312                                             | AY011376                                     | Ensembl 66                                   | AY011440                                                             |
| <i>Macroscelides proboscideus</i> | AY011327                                             | AY059682                                     | XXXXXX                                       | AY011454 gene                                                        |
| <i>Macrotis lagotis</i>           | JN633521                                             | JN633710                                     | XXXXXX                                       | JN633345                                                             |
| <i>Mandrillus leucophaeus</i>     | JYKQ01179459                                         | JYKQ01226827                                 | JYKQ01237777                                 | JYKQ01205236                                                         |
| <i>Manis pentadactyla</i>         | AY011374                                             | AY011438                                     | JN633018                                     | AY011501                                                             |
| <i>Manis tricuspis</i>            | XXXXXX                                               | JN633735                                     | JN633019                                     | JN633373                                                             |
| <i>Marmota marmota</i>            | CEEU01000005                                         | CEEU01000108                                 | CEEU01000038                                 | CEEU01000004                                                         |
| <i>Megaderma lyra</i>             | AY059680                                             | AY059684                                     | JN633021                                     | AY059688                                                             |
| <i>Megaptera novaeangliae</i>     | AY011359                                             | AY011423                                     | JN633004                                     | AY011486                                                             |
| <i>Meles meles</i>                | GU930925                                             | GU930958                                     | JN633011                                     | GU931002                                                             |
| <i>Mephitis mephitis</i>          | GU930918                                             | GU930951                                     | JN633010                                     | GU930995                                                             |
| <i>Mesocricetus auratus</i>       | APMT01083232                                         | APMT01186148                                 | APMT01100704                                 | APMT01007498                                                         |
| <i>Mesoplodon bidens</i>          | JN414076                                             | JN414087                                     | JN414098                                     | JN414111                                                             |
| <i>Microcebus murinus</i>         | EU142146                                             | ABDC01401788 and<br>ABDC01544569             | HM764138                                     | EU142161                                                             |
| <i>Microtus agrestis Northern</i> | WGS specimen from<br>England<br>LIQJ01000532 deleted | WGS specimen from<br>England<br>LIQJ01008612 | WGS specimen from<br>England<br>LIQJ01000306 | WGS specimen from<br>England<br>LIQJ01002043 reduced<br>string of Ns |
| <i>Microtus ochrogaster</i>       | AHZW01124588                                         | AHZW01161588                                 | AHZW01024823                                 | AHZW01134202                                                         |
| <i>Monodelphis domestica</i>      | Ensembl 66                                           | XM_001363299                                 | Ensembl 66                                   | XM_001368353                                                         |
| <i>Mus musculus</i>               | AY011334                                             | AY011397                                     | Ensembl 66                                   | AY011461                                                             |
| <i>Mustela putorius</i>           | PreEnsembl 66                                        | PreEnsembl 65                                | AGTQ01007252                                 | EF987626 gene                                                        |
| <i>Myocastor coypus</i>           | XXXXXX                                               | JN633746                                     | JN633045                                     | JN633382                                                             |
| <i>Myodes glareolus</i>           | LIP101001165                                         | LIP101031198                                 | LIP101019820                                 | LIP101000749                                                         |
| <i>Myotis brandtii</i>            | ANKR01177881                                         | ANKR01269851                                 | ANKR01160622                                 | ANKR01246086                                                         |
| <i>Myotis daubentonii</i>         | AY834475                                             | AY834499                                     | XXXXXX                                       | AY834523 gene                                                        |
| <i>Myotis davidii</i>             | ALWT01058843                                         | ALWT01029785                                 | ALWT01083962                                 | ALWT01018826                                                         |
| <i>Myotis lucifugus</i>           | AAPE02031163                                         | Ensembl 66                                   | Ensembl 66                                   | Ensembl 65                                                           |
| <i>Myrmecobius fasciatus</i>      | JN633533                                             | JN633722                                     | JN632985                                     | JN633358                                                             |
| <i>Myrmecophaga tridactyla</i>    | AY011318                                             | AY011382                                     | JN632995                                     | AY011446                                                             |
| <i>Mystacina tuberculata</i>      | AY834479                                             | AY834503                                     | XXXXXX                                       | AY834527                                                             |
| <i>Myzopoda aurita</i>            | AY834476                                             | AY834500                                     | XXXXXX                                       | AY834524                                                             |
| <i>Nandinia binotata</i>          | GU930915                                             | GU930948                                     | JN633012                                     | GU930992                                                             |
| <i>Nannospalax ehrenbergi</i>     | XXXXXX                                               | JN633759                                     | XXXXXX                                       | JN633389                                                             |
| <i>Nannospalax galili</i>         | AXCS01151017                                         | AXCS01095378                                 | AXCS01355899                                 | AXCS01018464                                                         |
| <i>Nasalis larvatus</i>           | HM764593                                             | JMHX01319538                                 | JMHX01319530                                 | JMHX01319543                                                         |
| <i>Natalus stramineus</i>         | AY834481                                             | AY834505                                     | JN633024                                     | AY834529                                                             |
| <i>Noctilio albiventris</i>       | AY834472                                             | KC783038                                     | XXXXXX                                       | AY834520 gene                                                        |
| <i>Nomascus leucogenys</i>        | Ensembl 66                                           | XM_003269039                                 | XM_003256400                                 | Ensembl 65                                                           |
| <i>Notoryctes typhlops</i>        | JN633518                                             | JN633707                                     | JN632970                                     | JN633342                                                             |
| <i>Nycteris thebaica</i>          | AY011358                                             | AY011422                                     | XXXXXX                                       | AY011485                                                             |
| <i>Nycticebus coucang</i>         | JN633552                                             | JN633741                                     | JN633040                                     | JN633379                                                             |
| <i>Nyctimene albiventer</i>       | KP175778                                             | AY834485                                     | JN633027                                     | AY834509                                                             |
| <i>Ochotona princeps</i>          | Ensembl 66                                           | AAYZ01601873                                 | ALIT01107822                                 | O. princeps                                                          |
| <i>Octodon degus</i>              | AJSA01048207                                         | AJSA01235526                                 | AJSA01216561                                 | AJSA01199394                                                         |
| <i>Octodontomys gliroides</i>     | JN633563                                             | JN633755                                     | JN633058                                     | XXXXXX                                                               |
| <i>Odobenus rosmarus</i>          | GU930933                                             | GU930966                                     | ANOP01003285                                 | GU931009                                                             |
| <i>Okapia johnstoni</i>           | AY011365                                             | AY011429                                     | JN632999                                     | AY011492                                                             |
| <i>Orcinus orca Norway</i>        | ANOL01007870                                         | ANOL01056729                                 | ANOL01068001                                 | ANOL01006713                                                         |



| Name                                 | APP           | ATP7A         | BCHE          | BDNF          |
|--------------------------------------|---------------|---------------|---------------|---------------|
| <i>Orycteropus afer</i>              | AY011329      | AY011392      | JN632989      | AY011456      |
| <i>Oryctolagus cuniculus</i>         | NM_001195669  | XM_002720131  | XM_002716368  | Ensembl 65    |
| <i>Otolemur garnettii</i>            | Ensembl 66    | AF535044      | Ensembl 66    | AF535049      |
| <i>Ovis aries</i>                    | AMGL01006077  | AMGL01116101  | AMGL01010037  | AMGL01032640  |
| <i>Pan paniscus</i>                  | HM764625      | AJFE01085991  | XM_003817698  | HM763828      |
| <i>Pan troglodytes</i>               | HM764626      | AF535046      | HM764133      | AF535050      |
| <i>Panthera tigris</i>               | DQ081763      | DQ082624      | ATCQ01025916  | ATCQ01152878  |
| <i>Pantholops hodgsonii</i>          | Scaffold 475  | Scaffold 371  | Scaffold 93   | Scaffold 297  |
| <i>Papio anubis</i>                  | HM764594      | AHZZ01040122  | HM764096      | AHZZ01191662  |
| <i>Papio hamadryas</i>               | HM764595      | PreEnsembl 65 | HM764085      | HM763802      |
| <i>Pecari tajacu</i>                 | JN633544      | JN633733      | JN633002      | JN633369      |
| <i>Pedetes capensis</i>              | AY011333      | AY011396      | XXXXXX        | AY011460      |
| <i>Peromyscus maniculatus</i>        | AYHN01088716  | AYHN01115324  | AYHN01012664  | AYHN01051544  |
| <i>Petaurus breviceps</i>            | JN633525      | JN633713      | JN632977      | JN633349      |
| <i>Petromus typicus</i>              | JN633564      | JN633756      | JN633059      | JN633387      |
| <i>Phascolarctos cinereus</i>        | JN633527      | JN633715      | JN632979      | JN633351      |
| <i>Phoca vitulina</i>                | GU930931      | GU930964      | JN633014      | GU931007      |
| <i>Phocoena phocoena</i>             | JN414079      | JN414090      | JN414101      | JN414114      |
| <i>Physeter macrocephalus</i>        | JN414081      | JN414092      | JN414103      | JN414116      |
| <i>Pithecia pithecia</i>             | HM764678      | XXXXXX        | HM764072      | FJ648367      |
| <i>Platanista minor</i>              | JN414082      | JN414093      | JN414104      | JN414117      |
| <i>Podogymnura truei</i>             | JN633548      | JN633737      | XXXXXX        | JN633375      |
| <i>Pongo abelii</i>                  | Ensembl 66    | Ensembl 65    | Ensembl 65    | Ensembl 65    |
| <i>Pontoporia blainvillei</i>        | JN414083      | JN414094      | JN414105      | JN414118      |
| <i>Prionodon linsang</i>             | DQ081767      | DQ082628      | JN633005      | GU930978      |
| <i>Procavia capensis</i>             | AY011325      | AY011389      | KC113260      | AY011452      |
| <i>Procyon lotor</i>                 | GU930937      | GU930971      | JN633015      | GU931013      |
| <i>Propithecus coquereli</i>         | HM764690      | JZKE01281665  | JZKE01209192  | JZKE01146377  |
| <i>Propithecus verreauxi</i>         | XXXXXX        | XXXXXX        | HM764139      | HM763877      |
| <i>Pseudochirops cupreus</i>         | JN633530      | JN633718      | JN632982      | JN633354      |
| <i>Pteronotus parnellii</i>          | KP175771      | AY834501      | JN633023      | AY834525      |
| <i>Pteropus alecto</i>               | ALWS01023881  | ALWS01034242  | ALWS01023209  | ALWS01021798  |
| <i>Pteropus giganteus</i>            | AY011356      | AY011420      | JN633026      | AY011483      |
| <i>Pteropus vampyrus</i>             | Ensembl 64    | Ensembl 64    | Ensembl 65    | Ensembl 65    |
| <i>Ptilocercus lowii</i>             | EU142147      | EU142148      | EU142160      | EU142162      |
| <i>Rattus norvegicus</i>             | AY011335      | AY011398      | Ensembl 64    | AY011462 gene |
| <i>Rhinolophus creaghi</i>           | AY834462      | AY834486      | JN633028      | AY834510      |
| <i>Rhinolophus ferrumequinum</i>     | AWHA01057119  | AWHA01013018  | AWHA01075222  | AWHA01095002  |
| <i>Rhinopithecus roxellana</i>       | JABR01081111  | JABR01067945  | JABR01097653  | JABR01058482  |
| <i>Rhinopoma hardwickii</i>          | AY834465      | AY834489      | XXXXXX        | AY834513      |
| <i>Rhogeessa tumida</i>              | AY834474      | AY834498      | XXXXXX        | AY834522 gene |
| <i>Rhynchocyon petersi</i>           | JN633535      | JN633724      | JN632988      | JN633360      |
| <i>Rhyncholestes raphanurus</i>      | EF104985      | XXXXXX        | JN632972      | EF104988      |
| <i>Saccopteryx bilineata</i>         | JN633546      | JN633736      | XXXXXX        | JN633374      |
| <i>Saimiri boliviensis</i>           | PreEnsembl 66 | AGCE01103824  | PreEnsembl 66 | PreEnsembl 66 |
| <i>Sarcophilus harrisii</i>          | Ensembl 66    | Ensembl 65    | Ensembl 65    | Ensembl 65    |
| <i>Solenodon paradoxus</i>           | AY530068      | AY530069      | JN633032      | AY530070      |
| <i>Sorex araneus</i>                 | AY011322      | AY011386      | JN633033      | Ensembl 65    |
| <i>Spermophilus tridecemlineatus</i> | AAQQ01242066  | Ensembl 66    | PreEnsembl 66 | Ensembl 64    |
| <i>Suricata suricatta</i>            | DQ081770      | DQ082631      | JN633008      | GU930982      |
| <i>Sus scrofa</i>                    | AY011364      | Ensembl 66    | JN414107      | AY011491      |
| <i>Tadarida brasiliensis</i>         | AY059679      | AY059683      | JN633022      | AY059687      |
| <i>Talpa altaica</i>                 | AY011320      | AY011384      | JN633034      | AY011448      |
| <i>Tamias striatus</i>               | AY011330      | AY011393      | EU142149      | AY011457 gene |
| <i>Tapirus indicus</i>               | AY011368      | AY011432      | JN633036      | AY011495      |
| <i>Tarsipes rostratus</i>            | XXXXXX        | JN633719      | JN632983      | JN633355      |
| <i>Tarsius bancanus</i>              | AY011350      | AY011413      | HM764200      | XXXXXX        |
| <i>Tarsius syrichta</i>              | AF535041      | AF535045      | HM764115      | Ensembl 64    |
| <i>Thryonomys swinderianus</i>       | JN633565      | JN633757      | JN633060      | XXXXXX        |
| <i>Tragulus napu</i>                 | JN633545      | JN633734      | JN633003      | JN633370      |
| <i>Trichechus manatus</i>            | AY011324      | AY011388      | JN632992      | AHIN01009936  |
| <i>Trichosurus vulpecula</i>         | JN633526      | JN633714      | JN632978      | JN633350      |
| <i>Tupaia belangeri</i>              | AAPY01680043  | ALAR01054491  | Ensembl 65    | FJ554888      |
| <i>Tupaia minor</i>                  | AY011348      | AY011411      | EU142158      | AY011475      |
| <i>Tursiops truncatus</i>            | AY011360      | AY011424      | ABRN02497341  | AY011487      |
| <i>Urogale everetti</i>              | AF535038      | AF535042      | EU142159      | FJ554908      |

| Name                               | APP          | ATP7A        | BCHE         | BDNF          |
|------------------------------------|--------------|--------------|--------------|---------------|
| <i>Ursus_americanus</i>            | genome       | genome       | genome       | genome        |
| <i>Ursus_arctos</i>                | AY011373     | AY011437     | genome       | AY011500 gene |
| <i>Ursus_maritimus</i>             | Scaffold 11  | Scaffold 211 | Scaffold 154 | Scaffold 46   |
| <i>Vicugna_pacos</i>               | ABRR01160158 | Ensembl 65   | Ensembl 65   | Ensembl 65    |
| <i>Vombatus_ursinus</i>            | JN633531     | JN633720     | KC113262     | JN633356      |
| <i>Allenopithecus_nigroviridis</i> | HM764554     | XXXXXX       | HM764088     | HM763765      |
| <i>Alouatta_sara</i>               | HM764644     | XXXXXX       | HM764103     | HM763843      |
| <i>Anolis_carolinensis</i>         | XXXXXX       | AAWZ02027535 | Ensembl 66   | Ensembl 66    |
| <i>Cacajao_calvus</i>              | HM764655     | XXXXXX       | HM764110     | HM763852      |
| <i>Callimico_goeldii</i>           | HM764632     | AY011417     | HM764218     | AY011480 gene |
| <i>Cercocebus_chrysogaster</i>     | HM764555     | XXXXXX       | HM764084     | HM763766      |
| <i>Cercopithecus_albogularis</i>   | HM764558     | XXXXXX       | HM764149     | HM763769      |
| <i>Cercopithecus_diana</i>         | HM764561     | FJ648396     | HM764146     | FJ648364 gene |
| <i>Cynopterus_brachyotis</i>       | AY834460     | AY834484     | XXXXXX       | AY834508 gene |
| <i>Erinaceus_concolor</i>          | AY011319     | AY011383     | JN633031     | AY011447 gene |
| <i>Erythrocebus_patas</i>          | HM764573     | XXXXXX       | HM764092     | XXXXXX        |
| <i>Eulemur_mongoz</i>              | HM764696     | XXXXXX       | HM764127     | HM763882      |
| <i>Galago_senegalensis</i>         | HM764709     | XXXXXX       | HM764078     | HM763892      |
| <i>Gallus_gallus</i>               | XXXXXX       | AADN03003791 | Ensembl 66   | Ensembl 66    |
| <i>Graphiurus_murinus</i>          | JN633562     | JN633754     | JN633057     | JN633386      |
| <i>Haplemur_griseus</i>            | HM764698     | XXXXXX       | HM764177     | HM763884      |
| <i>Hylobates_agilis</i>            | HM764616     | FJ648397     | HM764175     | FJ648366 gene |
| <i>Hylobates_muelleri</i>          | HM764619     | FJ648399     | HM764173     | XXXXXX        |
| <i>Lagothrix_lagotricha</i>        | XXXXXX       | XXXXXX       | HM764106     | HM763833      |
| <i>Leontopithecus_rosalia</i>      | HM764640     | XXXXXX       | HM764086     | HM763840      |
| <i>Macaca_fuscata</i>              | HM764579     | XXXXXX       | HM764140     | HM763790      |
| <i>Miopithecus_ogouensis</i>       | HM764592     | XXXXXX       | HM764121     | HM763799      |
| <i>Moschus_moschiferus</i>         | JN633543     | JN633732     | JN633001     | JN633368      |
| <i>Neovison_vison</i>              | GU930926     | GU930959     | XXXXXX       | GU931003      |
| <i>Nomascus_concolor</i>           | HM764620     | AY011416     | XXXXXX       | AY011479      |
| <i>Ochotona_hyperborea</i>         | AY011346     | AY011409     | JN633030     | AY011473      |
| <i>Ornithorhynchus_anatinus</i>    | XXXXXX       | XM_001507216 | XM_001505791 | XM_001511930  |
| <i>Panthera_onca</i>               | AY011371     | AY011435     | XXXXXX       | AY011498      |
| <i>Pongo_pygmaeus</i>              | HM764628     | XXXXXX       | HM764172     | HM763831      |
| <i>Propithecus_diadema</i>         | HM764686     | XXXXXX       | HM764077     | HM763875      |
| <i>Pygathrix_nemaeus</i>           | HM764601     | XXXXXX       | HM764159     | HM763808      |
| <i>Rousettus_lanosus</i>           | AY011357     | AY011421     | XXXXXX       | AY011484      |
| <i>Saguinus_fuscicollis</i>        | HM764664     | XXXXXX       | HM764074     | HM763858      |
| <i>Saimiri_oerstedii</i>           | HM764670     | XXXXXX       | HM764205     | HM763864      |
| <i>Saimiri_sciureus</i>            | HM764671     | XXXXXX       | HM764132     | HM763865      |
| <i>Semnopithecus_entellus</i>      | HM764605     | XXXXXX       | HM764193     | HM763811      |
| <i>Sylvilagus_floridanus</i>       | AY011345     | AY011408     | EU142151     | AY011472      |
| <i>Symphalangus_syndactylus</i>    | HM764623     | XXXXXX       | HM764080     | HM763826      |
| <i>Tachyglossus_acleatus</i>       | XXXXXX       | JN633704     | KC113261     | JN614210      |
| <i>Taeniopygia_guttata</i>         | XXXXXX       | ABQF01019089 | Ensembl 66   | Ensembl 66    |
| <i>Thyroptera_tricolor</i>         | AY834478     | AY834502     | JN633029     | AY834526      |
| <i>Trachypithecus_francoisi</i>    | HM764610     | XXXXXX       | HM764083     | HM763815      |
| <i>Tupaia_glis</i>                 | HM764715     | XXXXXX       | HM764070     | FJ554896      |
| <i>Tamandua_tetractyla</i>         | AY011317     | AY011381     | XXXXXX       | AY011445      |
| <i>Xenopus_tropicalis</i>          | XXXXXX       | XXXXXX       | XXXXXX       | XXXXXX        |

| Name                          | BMI1         | BRCA1        | BRCA2        | CNR1         |
|-------------------------------|--------------|--------------|--------------|--------------|
| <i>Abrocoma_bennettii</i>     | JN632763     | JN414189     | JN414328     | JN633193     |
| <i>Acinonyx_jubatus</i>       | LLWD01001117 | LLWD01000294 | LLWD01000334 | LLWD01000293 |
| <i>Acrobates_pygmaeus</i>     | JN632719     | FJ603119     | JN414221     | JN633139     |
| <i>Aepyprymnus_rufescens</i>  | JN632724     | EU160439     | JN414227     | JN633144     |
| <i>Ailuropoda_melanoleuca</i> | JN632752     | JN414166     | JN414284     | Ensembl 65   |
| <i>Ailurus_fulgens</i>        | JN632743     | JN414155     | JN414273     | JN633162     |
| <i>Amblysomus_hottentotus</i> | JN632731     | AF284027     | JN414235     | AY059693     |
| <i>Anomalurus_beecrofti</i>   | JN632765     | JN414191     | JN414330     | JN633194     |
| <i>Anoura_geoffroyi</i>       | AY834543     | FN641912     | XXXXXX       | XXXXXX       |
| <i>Antilocapra_americana</i>  | JN632738     | JN414135     | JN414250     | JN633158     |
| <i>Antrozous_pallidus</i>     | AY834545     | AF447495     | XXXXXX       | XXXXXX       |

| Name                                | BMI1                                 | BRCA1                                                       | BRCA2                                            | CNR1                                 |
|-------------------------------------|--------------------------------------|-------------------------------------------------------------|--------------------------------------------------|--------------------------------------|
| <i>Aotus nancymae</i>               | JYKP01035550                         | JYKP01220922                                                | JYKP01110565                                     | HM763265                             |
| <i>Apodontia rufa</i>               | XXXXXX                               | AF332045                                                    | JN414331                                         | AY303179                             |
| <i>Apodemus sylvaticus</i>          | LIPJ01003270 deleted<br>string of Ns | LIPJ01023125                                                | LIPJ01008483                                     | LIPJ01003163 deleted<br>string of Ns |
| <i>Arctocephalus forsteri</i>       | JN632749                             | JN414163                                                    | JN414281                                         | JN633170                             |
| <i>Artibeus jamaicensis</i>         | AY011540                             | JN414174                                                    | JN414301                                         | AY011602                             |
| <i>Ateles fusciceps</i>             | AY011535                             | JN414182                                                    | JN414318                                         | AY011597                             |
| <i>Balaena mysticetus</i>           | Scaffold 673                         | Scaffold 2789                                               | Scaffold 1112                                    | scaffold 1436                        |
| <i>Balaenoptera acutorostrata</i>   | ATDI01149540                         | ATDI01115689                                                | ATDI01064226                                     | ATDI01084535                         |
| <i>Balaenoptera bonaerensis</i>     | BAUQ01169454                         | BAUQ01226510                                                | BAUQ01174725                                     | BAUQ01086321                         |
| <i>Bison bison</i>                  | JPYT01072132                         | JPYT01782699                                                | JPYT01754247                                     | JPYT01747717                         |
| <i>Bos grunniens</i>                | AGSK01120422                         | AGSK01177504                                                | AGSK01037111                                     | AGSK01021056                         |
| <i>Bos indicus</i>                  | AGFL01117037                         | AGFL01156997                                                | AGFL01110169                                     | XXXXXX                               |
| <i>Bos taurus</i>                   | Ensembl 66                           | Ensembl 65                                                  | Ensembl 66                                       | AAFC05013675                         |
| <i>Bradypus tridactylus</i>         | JN632737                             | AF284002                                                    | JN414247                                         | JN633156                             |
| <i>Bubalus bubalis</i>              | AWWX01572060                         | NW_005782793                                                | AWWX01603396                                     | AWWX01588770                         |
| <i>Caenolestes fuliginosus</i>      | JN632714                             | AF355794                                                    | JN414216                                         | JN633134                             |
| <i>Callithrix jacchus</i>           | Ensembl 65                           | Ensembl 65                                                  | JN414319                                         | HM763249                             |
| <i>Caluromys philander</i>          | JN632710                             | AY243444                                                    | JN414212                                         | JN633130                             |
| <i>Camelus bactrianus</i>           | GAF01000309                          | CAOW010019316                                               | CAOW010306340<br>(not including string of<br>Ns) | GAES01008129                         |
| <i>Camelus dromedarius</i>          | JWIN01035485                         | JWIN01032275                                                | JDVD01005221                                     | GADT01026217                         |
| <i>Camelus ferus</i>                | AGVR0104949                          | AGVR01006136                                                | AGVR01026502                                     | AGVR01016526                         |
| <i>Canis familiaris</i>             | AY011556                             | NM_001013416                                                | Ensembl 66                                       | AY011618                             |
| <i>Caperea marginata</i>            | JN414119                             | JN414144                                                    | JN414261                                         | JN414357                             |
| <i>Capra aegagrus</i>               | CBYH010057513                        | CBYH010036947                                               | CBYH010059847                                    | CBYH010044970                        |
| <i>Capra hircus</i>                 | AJPT01133350                         | AJPT01179074                                                | AJPT01125787                                     | GANZ01010966                         |
| <i>Capreolus capreolus</i>          | CCMK010138556                        | CCMK010196160                                               | CCMK010130172                                    | CCMK010100784                        |
| <i>Capromys pilorides</i>           | XXXXXX                               | JN414192                                                    | JN414333                                         | FM162140                             |
| <i>Castor canadensis</i>            | AY011517                             | AF540622                                                    | JN414335                                         | AY303180                             |
| <i>Cavia aperea</i>                 | AVPZ01000911                         | AVPZ01000489                                                | AVPZ01000667                                     | AVPZ01000444                         |
| <i>Cavia porcellus</i>              | AAKN02049680                         | AAKN02042423                                                | Ensembl 64                                       | Trace                                |
| <i>Cebus albifrons</i>              | JN632759                             | JN414184                                                    | JN414320                                         | JN633189                             |
| <i>Ceratotherium simum</i>          | AY011551                             | NW_004454205                                                | JN414314                                         | AY011613                             |
| <i>Cercartetus nanus</i>            | JN632720                             | EU160440                                                    | JN414222                                         | JN633140                             |
| <i>Cercocebus atys</i>              | JZLG01067809                         | JZLG01058674                                                | JZLG01009084                                     | JZLG01011505                         |
| <i>Cervus taiouanus</i>             | JN632739                             | JN414137                                                    | JN414252                                         | AY303181                             |
| <i>Cheirogaleus medius</i>          | XXXXXX                               | XXXXXX                                                      | HM763755                                         | HM763303                             |
| <i>Chinchilla lanigera</i>          | AGCD01028551                         | AGCD01043709                                                | JN414336                                         | AY303182                             |
| <i>Chlorocebus sabaeus</i>          | AQIB01160513                         | AQIB01145587                                                | HM763649                                         | HM763181                             |
| <i>Choloepus didactylus</i>         | AY011504 BMI1                        | AF484229                                                    | XXXXXX                                           | AY011560                             |
| <i>Choloepus hoffmanni</i>          | ABVD01226713,                        | Ensembl 71 (also<br>ABVD01360484 5' and<br>ABVD01360485 3') | ABVD01235566                                     | AY011559                             |
| <i>Chrysochloris asiatica</i>       | AMDV01210784                         | JN414131                                                    | AMDV01345966                                     | JN633151                             |
| <i>Colobus angolensis</i>           | JYKR01162898                         | JYKR01183844                                                | JYKR01081576                                     | HM763182                             |
| <i>Condylura cristata</i>           | AY011508                             | AJFV01045188                                                | AJFV01029669                                     | AY011566                             |
| <i>Cratogeomys castanops</i>        | AY834555                             | JN414170                                                    | JN414288                                         | JN633175                             |
| <i>Cricetulus griseus</i>           | JN632770                             | JN414200                                                    | JN414345                                         | JN633204                             |
| <i>Crocota crocata</i>              | AY011521 gene                        | PreEnsembl 65                                               | APMK01200021                                     | AY011581                             |
| <i>Ctenodactylus gundi</i>          | JN632745                             | JN414158                                                    | JN414276                                         | JN633165                             |
| <i>Ctenomys boliviensis</i>         | JN632767                             | AF540624                                                    | JN414338                                         | JN633199                             |
| <i>Cuniculus taczanowskii</i>       | JN632768                             | JN414196                                                    | JN414339                                         | JN633200                             |
| <i>Cynopithecus proboscideus</i>    | JN632764                             | JN414190                                                    | JN414329                                         | AY011590                             |
| <i>Cyclopes didactylus</i>          | XXXXXX                               | AF484231                                                    | JN414249                                         | JN633157                             |
| <i>Cynocephalus volans</i>          | AF535052                             | DQ354453                                                    | JN414306                                         | JN633186                             |
| <i>Cynopterus sphinx</i>            | XXXXXX                               | AF203750                                                    | XXXXXX                                           | GAOV01103786                         |
| <i>Dasyprocta punctata</i>          | JN632769                             | JN414197                                                    | JN414340                                         | JN633201                             |
| <i>Dasyypus novemcinctus</i>        | AAGV03251214                         | AF283999                                                    | AAGV03254727                                     | AAGV03065929                         |
| <i>Dasyurus albopunctatus</i>       | JN632729                             | AY243452                                                    | JN414232                                         | JN633149                             |
| <i>Daubentonia madagascariensis</i> | JN632760                             | JN414186                                                    | JN414322                                         | JN633190                             |
| <i>Delphinapterus leucas</i>        | JN414124                             | JN414149                                                    | JN414266                                         | JN414362                             |
| <i>Desmodus rotundus</i>            | AY834542                             | AF447503                                                    | XXXXXX                                           | XXXXXX                               |
| <i>Didelphis virginiana</i>         | AY011502                             | AF497261                                                    | JN414211                                         | AY011558                             |
| <i>Dinomys branickii</i>            | AY011527                             | DQ354450                                                    | JN414341                                         | FM162137                             |

| Name                              | BMI1          | BRCA1                         | BRCA2        | CNR1         |
|-----------------------------------|---------------|-------------------------------|--------------|--------------|
| <i>Dipodomys_heermanni</i>        | EF104990      | JN414201                      | JN414346     | AY011584     |
| <i>Dipodomys_ordii</i>            | ABRO02021788  | ABRO02063122                  | ABRO02053325 | Ensembl 65   |
| <i>Dromiciops_gliroides</i>       | JN632712      | AY243446                      | JN414214     | JN633132     |
| <i>Dugong_dugon</i>               | JN632735      | AF284019                      | JN414242     | JN633154     |
| <i>Echinops_telfairi</i>          | AY011510      | AF284025                      | AAIY02243879 | AAIY01270889 |
| <i>Echymipera_kalubu</i>          | N632718       | AF355796                      | JN414220     | JN633138     |
| <i>Eidolon_helvum</i>             | AWHC01020955  | AWHC01124120                  | AWHC01232115 | AWHC01178435 |
| <i>Elephantulus_edwardii</i>      | AMGZ01097865  | AMGZ01250249                  | AMGZ01010756 | AMGZ01258982 |
| <i>Elephantulus_rufescens</i>     | AY059689      | AF284028                      | JN414237     | AY011573     |
| <i>Elephas_maximus</i>            | JN632736      | AF284022                      | JN414244     | JN633155     |
| <i>Emballonura_atrata</i>         | AY834538      | AF447505                      | XXXXXX       | XXXXXX       |
| <i>Eptesicus_fuscus</i>           | ALEH01079049  | ALEH01082126                  | ALEH01135081 | ALEH01001614 |
| <i>Equus_asinus</i>               | JREZ01000553  | JREZ01000009                  | JREZ01000110 | JREZ01000922 |
| <i>Equus_caballus</i>             | AY011550      | AAWR02012618                  | AAWR02035369 | AAWR02014702 |
| <i>Equus_przewalskii</i>          | ATBW01007532  | ATBW01065891                  | ATBW01007591 | ATBW01016940 |
| <i>Erethizon_dorsatum</i>         | EF104991      | DQ354451                      | JN414344     | AY011583     |
| <i>Erinaceus_europaeus</i>        | Ensembl 66    | DQ354459                      | JN414309     | Ensembl 75   |
| <i>Eschrichtius_robustus</i>      | JN414121      | JN414146                      | JN414263     | JN414359     |
| <i>Eubalaena_australis</i>        | JN414120      | JN414145                      | JN414262     | JN414358     |
| <i>Eulemur_flavifrons</i>         | LGHW01002881  | LGHW01001347                  | LGHW01006641 | HM763313     |
| <i>Eulemur_macaco</i>             | LGHX01002851  | LGHX01001335                  | LGHX01006533 | HM763312     |
| <i>Eumops_auripendulus</i>        | AY834554      | AY834652                      | XXXXXX       | XXXXXX       |
| <i>Euphractus_sexinctus</i>       | XXXXXX        | AF484224                      | XXXXXX       | AY011561     |
| <i>Felis_catus</i>                | AY011553      | AF284018                      | NM_001009858 | AY011615     |
| <i>Fossa_fossana</i>              | JN632744      | JN414156                      | JN414274     | JN633163     |
| <i>Fukomys_damarensis</i>         | AYUG01084307  | AYUG01128849                  | AYUG01092000 | AYUG01109009 |
| <i>Furipterus_horrens</i>         | AY834552      | JN414171                      | JN414290     | XXXXXX       |
| <i>Galeopterus_variegatus</i>     | AY011531      | AF019081                      | JN414307     | AY011593     |
| <i>Genetta_genetta</i>            | JN632753      | JN414167                      | JN414285     | JN633174     |
| <i>Glironia_yenusta</i>           | JN632711      | JN414130                      | JN414213     | JN633131     |
| <i>Gorilla_gorilla</i>            | Ensembl 65    | AF019076                      | Ensembl 66   | HM763235     |
| <i>Heterocephalus_glaber</i>      | AY011523      | AF540630                      | AHKG01054575 | FM162134     |
| <i>Heterohyrax_brucei</i>         | JN632734      | JN414133                      | JN414240     | JN633153     |
| <i>Hippopotamus_amphibius</i>     | AY011546      | AF284015                      | XXXXXX       | AY011608     |
| <i>Hipposideros_commersoni</i>    | AY834535      | AF203752                      | JN414291     | JN633177     |
| <i>Homo_sapiens</i>               | AY011539      | Ensembl 65                    | Ensembl 64   | KF042592     |
| <i>Hoplomys_gymnurus</i>          | XXXXXX        | JN414199                      | JN414343     | JN633203     |
| <i>Hydrochoeris_hydrochaeris</i>  | AY011525      | JN414202                      | JN414347     | FM162142     |
| <i>Hydrodamalis_gigas</i>         | consensus     | consensus                     | consensus    | consensus    |
| <i>Hylobates_lar</i>              | XXXXXX        | KM017617                      | KM017652     | HM763229     |
| <i>Hypsiprymnodon_moschatus</i>   | JN632725      | FJ603120                      | JN414228     | JN633145     |
| <i>Hystrix_brachyura</i>          | AY011522      | AF540631                      | JN414348     | AY011582     |
| <i>Inia_geoffrensis</i>           | JN414123      | JN414148                      | JN414265     | JN414361     |
| <i>Isoodon_macrourus</i>          | JN632716      | EU160441                      | JN414218     | JN633136     |
| <i>Jaculus_jaculus</i>            | AKZC01268279  | JN414198                      | JN414342     | JN633202     |
| <i>Kogia_breviceps</i>            | JN414126      | JN414151                      | JN414268     | JN414364     |
| <i>Lama_glama</i>                 | AY059690      | AF284012                      | JN414251     | AY011609     |
| <i>Laonastes_aenigmamus</i>       | JN632773      | JN414207                      | JN414354     | JN633208     |
| <i>Lemur_catta</i>                | AY011533      | DQ354455                      | JN414325     | AY011595     |
| <i>Leptonychotes_weddellii</i>    | APMU01032944  | APMU01146723                  | APMU01025971 | APMU01133632 |
| <i>Lipotes_vexillifer</i>         | AUPI01055423  | AUPI01137623                  | AUPI01109709 | AUPI01149645 |
| <i>Loxodonta_africana</i>         | AY011513 BMI1 | AF284021                      | AAGU03028350 | AY011571     |
| <i>Macaca_fascicularis</i>        | CAEC01649055  | AEHL01180717                  | AEHL01187126 | HM763190     |
| <i>Macaca_mulatta</i>             | AY011536      | Ensembl 65                    | Ensembl 64   | AY011598     |
| <i>Macaca_nemestrina</i>          | JZLF01084246  | JZLF01065365                  | JZLF01013812 | HM763194     |
| <i>Macroderma_gigas</i>           | AY834536      | AY834645                      | XXXXXX       | XXXXXX       |
| <i>Macropus_eugenii</i>           | AY011503      | FJ603179 and<br>ABQO020900054 | JN414223     | Trace        |
| <i>Macroscelides_proboscideus</i> | AY011514      | XXXXXX                        | XXXXXX       | AY011572     |
| <i>Macrotis_lagotis</i>           | JN632717      | EU369359                      | JN414219     | JN633137     |
| <i>Mandrillus_leucophaeus</i>     | JYKQ01139001  | JYKQ01181776                  | JYKQ01175801 | HM763202     |
| <i>Manis_pentadactyla</i>         | EF104992      | JN414168                      | JN414286     | AY011619     |
| <i>Manis_tricuspis</i>            | JN632754      | JN414169                      | JN414287     | XXXXXX       |
| <i>Marmota_marmota</i>            | CEEU01000042  | CEEU01000043                  | CEEU01000014 | CEEU01000003 |
| <i>Megaderma_lyra</i>             | AY059692      | AF203749                      | JN414292     | AY059695     |
| <i>Megaptera_novaeangliae</i>     | AY011544      | JN414142                      | JN414259     | AY011606     |

| Name                              | BMI1                                          | BRCA1                                                              | BRCA2                                                                          | CNR1                                         |
|-----------------------------------|-----------------------------------------------|--------------------------------------------------------------------|--------------------------------------------------------------------------------|----------------------------------------------|
| <i>Meles meles</i>                | XXXXXX                                        | JN414160                                                           | JN414278                                                                       | JN633167                                     |
| <i>Mephitis mephitis</i>          | JN632746                                      | JN414159                                                           | JN414277                                                                       | JN633166                                     |
| <i>Mesocricetus auratus</i>       | APMT01161325                                  | AY295013                                                           | APMT01165796                                                                   | APMT01141571                                 |
| <i>Mesoplodon bidens</i>          | JN414122                                      | JN414147                                                           | JN414264                                                                       | JN414360                                     |
| <i>Microcebus murinus</i>         | EU142163                                      | JN414185                                                           | JN414321                                                                       | HM763304                                     |
| <i>Microtus agrestis Northern</i> | WGS specimen from<br>England<br>LIQJ01007958  | WGS specimen from<br>England LIQJ01002227                          | WGS specimen from<br>England<br>LIQJ01013733 deleted<br>internal strings of Ns | WGS specimen from<br>England<br>LIQJ01000676 |
| <i>Microtus ochrogaster</i>       | AHZW01123445                                  | AHZW01154785                                                       | AHZW01170103                                                                   | AHZW01006034                                 |
| <i>Monodelphis domestica</i>      | XM_001367795                                  | AAFR03030033                                                       | Ensembl 56                                                                     | AAFR03001906                                 |
| <i>Mus musculus</i>               | AY011520                                      | Ensembl 65                                                         | Ensembl 64                                                                     | AY011579                                     |
| <i>Mustela putorius</i>           | PrEnsembl 65                                  | AGTQ01061753                                                       | AEYP01075860                                                                   | PreEnsembl 65                                |
| <i>Myocastor coypus</i>           | AY011526                                      | JN414193                                                           | JN414334                                                                       | AY011588                                     |
| <i>Myodes glareolus</i>           | LIP101003243                                  | LIP101007503 deleted long<br>string on Ns in middle of<br>sequence | LIP101001085                                                                   | LIP101003799                                 |
| <i>Myotis brandtii</i>            | ANKR01202898                                  | ANKR01261371                                                       | ANKR01286171                                                                   | ANKR01163594                                 |
| <i>Myotis daubentonii</i>         | AY834547                                      | AF203746                                                           | XXXXXX                                                                         | XXXXXX                                       |
| <i>Myotis davidii</i>             | ALWT01072590                                  | ALWT01199117                                                       | ALWT01115078                                                                   | ALWT01194919                                 |
| <i>Myotis lucifugus</i>           | AAPE02028320                                  | Ensembl 65                                                         | Ensembl 66                                                                     | Ensembl 65                                   |
| <i>Myrmecobius fasciatus</i>      | JN632730                                      | FJ603122                                                           | JN414233                                                                       | JN633150                                     |
| <i>Myrmecophaga tridactyla</i>    | AY011505                                      | AF484232                                                           | JN414248                                                                       | AY011564                                     |
| <i>Mystacina tuberculata</i>      | AY834551                                      | AY245829                                                           | JN414296                                                                       | JN633179                                     |
| <i>Myzopoda aurita</i>            | AY834548                                      | AY834649                                                           | JN414297                                                                       | XXXXXX                                       |
| <i>Nandinia binotata</i>          | JN632747                                      | JN414161                                                           | JN414279                                                                       | JN633168                                     |
| <i>Nannospalax ehrenbergi</i>     | JN632774                                      | JN414208                                                           | JN414355                                                                       | JN633209                                     |
| <i>Nannospalax galili</i>         | AXCS01059558                                  | AXCS01204261                                                       | AXCS01227617                                                                   | AXCS01060413                                 |
| <i>Nasalis larvatus</i>           | JMHX01297002 (5')<br>and JMHX01070823<br>(3') | JMHX01319545                                                       | JMHX01319546                                                                   | JMHX01319532                                 |
| <i>Natalus stramineus</i>         | AY834553                                      | AF447498                                                           | JN414298                                                                       | JN633180                                     |
| <i>Noctilio albiventris</i>       | AY834544                                      | AF447497                                                           | JN414299                                                                       | XXXXXX                                       |
| <i>Nomascus leucogenys</i>        | XM_003257703                                  | Ensembl 65                                                         | ADVF01054538                                                                   | HM763230                                     |
| <i>Notoryctes typhlops</i>        | JN632713                                      | AY243447                                                           | JN414215                                                                       | JN633133                                     |
| <i>Nycteris thebaica</i>          | AY011543                                      | JN414173                                                           | JN414300                                                                       | AY011605                                     |
| <i>Nycticebus coucang</i>         | JN632762                                      | JN414188                                                           | JN414326                                                                       | JN633192                                     |
| <i>Nyctimene albiventer</i>       | AY834533                                      | AF447502                                                           | JN414302                                                                       | JN633182                                     |
| <i>Ochotona princeps</i>          | Ensembl 66                                    | Y057827                                                            | JN414308                                                                       | Trace                                        |
| <i>Octodon degus</i>              | AJSA01205180                                  | AJSA01097490                                                       | AJSA01075521                                                                   | FM162141                                     |
| <i>Octodontomys gliroides</i>     | XXXXXX                                        | JN414204                                                           | JN414350                                                                       | JN633205                                     |
| <i>Odobenus rosmarus</i>          | JN632748                                      | JN414162                                                           | JN414280                                                                       | XM_004417497                                 |
| <i>Okapia johnstoni</i>           | AY011549                                      | JN414138                                                           | JN414253                                                                       | AY011611                                     |
| <i>Orcinus orca Norway</i>        | ANOL01059190                                  | ANOL01065454                                                       | ANOL01064129                                                                   | ANOL01009225                                 |
| <i>Orycteropus afer</i>           | AY011515                                      | AF284030                                                           | ALYB01315963                                                                   | ALYB01024016                                 |
| <i>Oryctolagus cuniculus</i>      | Ensembl 66                                    | Ensembl 65                                                         | Ensembl 66                                                                     | Trace                                        |
| <i>Otolemur garnettii</i>         | AF535053                                      | AF019080                                                           | JN414323                                                                       | AAQR03136552                                 |
| <i>Ovis aries</i>                 | ACIV011213004                                 | AMGL01018704                                                       | AMGL01014156                                                                   | AMGL01107361                                 |
| <i>Pan paniscus</i>               | AJFE01073340                                  | AJFE01044600                                                       | AJFE01094291                                                                   | HM763236                                     |
| <i>Pan troglodytes</i>            | AF535055 BMI1 gene                            | AF019075                                                           | Ensembl 66                                                                     | HM763238                                     |
| <i>Panthera tigris</i>            | ATCQ01051323                                  | ATCQ01089030                                                       | ATCQ01147869                                                                   | ATCQ01024962                                 |
| <i>Pantholops hodgsonii</i>       | Scaffold 522                                  | Scaffold 227                                                       | Scaffold 855                                                                   | Scaffold 886                                 |
| <i>Papio anubis</i>               | AHZZ01098308                                  | AHZZ01189586                                                       | AHZZ01044417                                                                   | HM763206                                     |
| <i>Papio hamadryas</i>            | PreEnsembl 66                                 | PreEnsembl 66                                                      | PreEnsembl 66                                                                  | HM763207                                     |
| <i>Pecari tajacu</i>              | JN632741                                      | JN414140                                                           | JN414257                                                                       | JN633159                                     |
| <i>Pedetes capensis</i>           | AY011519                                      | AF332047                                                           | JN414351                                                                       | AY011578                                     |
| <i>Peromyscus maniculatus</i>     | AYHN01041437                                  | AYHN01117237                                                       | AYHN01084171                                                                   | AYHN01025777                                 |
| <i>Petaurus breviceps</i>         | JN632721                                      | EU160443                                                           | JN414224                                                                       | JN633141                                     |
| <i>Petromus typicus</i>           | JN632771                                      | AF540639                                                           | JN414352                                                                       | JN633206                                     |
| <i>Phascolarctos cinereus</i>     | JN632723                                      | AY243445                                                           | JN414226                                                                       | JN633143                                     |
| <i>Phoca vitulina</i>             | JN632750                                      | JN414164                                                           | JN414282                                                                       | JN633171                                     |
| <i>Phocoena phocoena</i>          | JN414125                                      | JN414150                                                           | JN414267                                                                       | JN414363                                     |
| <i>Physeter macrocephalus</i>     | JN414127                                      | AF284016                                                           | JN414269                                                                       | JN414365                                     |
| <i>Pithecia pithecia</i>          | FJ648372 BMI1                                 | XXXXXX                                                             | HM763754                                                                       | HM763301                                     |
| <i>Platanista minor</i>           | JN414128                                      | XXXXXX                                                             | JN414270                                                                       | JN414366                                     |
| <i>Podogymnura truei</i>          | JN632757                                      | JN414177                                                           | JN414310                                                                       | JN633187                                     |

| Name                                 | BMI1               | BRCA1                                                                                   | BRCA2         | CNR1                               |
|--------------------------------------|--------------------|-----------------------------------------------------------------------------------------|---------------|------------------------------------|
| <i>Pongo_abelii</i>                  | Ensembl 65         | XM_002827484                                                                            | Ensembl 66    | Ensembl 65                         |
| <i>Pontoporia_blainvillei</i>        | JN414129           | JN414153                                                                                | JN414271      | JN414367                           |
| <i>Prionodon_linsang</i>             | XXXXXX             | JN414154                                                                                | JN414272      | JN633161                           |
| <i>Procyon_capensis</i>              | AY011512           | AF284023                                                                                | JN414241      | AY011570                           |
| <i>Procyon_lotor</i>                 | JN632751           | JN414165                                                                                | JN414283      | JN633172                           |
| <i>Propithecus_coquereli</i>         | JZKE01006847       | Propithecus_verreauxi in<br>GenBank but Propithecus<br>verreauxi coquereli from<br>GRES | JZKE01073743  | HM763310                           |
| <i>Propithecus_verreauxi</i>         | XXXXXX             | XXXXXX                                                                                  | HM763758      | HM763309                           |
| <i>Pseudochirops_cupreus</i>         | JN632726           | FJ603123                                                                                | JN414229      | JN633146                           |
| <i>Pteronotus_parnellii</i>          | AY834549           | FN641904                                                                                | JN414295      | JN633178                           |
| <i>Pteropus_alecto</i>               | ALWS01015730       | ALWS01109820                                                                            | ALWS01064548  | ALWS01167645                       |
| <i>Pteropus_giganteus</i>            | AY011541           | JN414175                                                                                | Ensembl 56    | AY011603                           |
| <i>Pteropus_vampyrus</i>             | Ensembl 64         | Ensembl 65                                                                              | Ensembl 66    | Ensembl 64                         |
| <i>Ptilocercus_lowii</i>             | EU142164           | JN414180                                                                                | JN414316      | EU142167                           |
| <i>Rattus_norvegicus</i>             | Ensembl 65         | Ensembl 65                                                                              | Ensembl 66    | AY011580                           |
| <i>Rhinolophus_creaghi</i>           | AY834534           | AF447499                                                                                | JN414303      | JN633183                           |
| <i>Rhinolophus_ferrumequinum</i>     | AWHA01024551       | AWHA01243254                                                                            | AWHA01030698  | AWHA01126751                       |
| <i>Rhinopithecus_roxellana</i>       | JABR01038241       | JABR01066867                                                                            | JABR01037048  | JABR01021460                       |
| <i>Rhinopoma_hardwickii</i>          | AY834537           | AF447504                                                                                | JN414304      | JN633184                           |
| <i>Rhogeessa_tumida</i>              | AY834546           | AF447496                                                                                | XXXXXX        | XXXXXX                             |
| <i>Rhynchocyon_petersi</i>           | JN632733           | JN414132                                                                                | JN414238      | JN633152                           |
| <i>Rhyncholestes_raphanurus</i>      | JN632715           | AY243454                                                                                | JN414217      | JN633135                           |
| <i>Saccolaryx_bilineata</i>          | JN632755           | XXXXXX                                                                                  | JN414289      | JN633176                           |
| <i>Saimiri_boliviensis</i>           | Ensembl 66         | PreEnsembl                                                                              | HM763747      | HM763291                           |
| <i>Sarcophilus_harrisii</i>          | Ensembl 65         | AFEY01251355                                                                            | AFEY01372152  | Ensembl 66                         |
| <i>Solenodon_paradoxus</i>           | JN632758           | AY530080                                                                                | JN414311      | JN633188                           |
| <i>Sorex_araneus</i>                 | AY011509           | Ensembl 65                                                                              | Ensembl 64    | AY011567                           |
| <i>Spermophilus_tridecemlineatus</i> | PreEnsembl 66      | AGTP01023534                                                                            | PreEnsembl 66 | AY303194                           |
| <i>Suricata_suricata</i>             | XXXXXX             | JN414157                                                                                | JN414275      | JN633164                           |
| <i>Sus_scrofa</i>                    | AY011548           | AF284014                                                                                | JN414256      | AY011610                           |
| <i>Tadarida_brasiliensis</i>         | AY059691           | AF203747                                                                                | JN414294      | AY059694                           |
| <i>Talpa_altaica</i>                 | AY011507           | KP717201                                                                                | JN414313      | AY011565                           |
| <i>Tamias_striatus</i>               | AY011516 BMI1      | JN414205                                                                                | XXXXXX        | AY011575                           |
| <i>Tapirus_indicus</i>               | AY011552           | JN414179                                                                                | JN414315      | AY011614                           |
| <i>Tarsipes_rostratus</i>            | JN632727           | FJ603124                                                                                | JN414230      | JN633147                           |
| <i>Tarsius_bancanus</i>              | AY011534 BMI1      | XXXXXX                                                                                  | XXXXXX        | AY011596                           |
| <i>Tarsius_syrichta</i>              | AF535054           | DQ354456                                                                                | JN414327      | ABRT010238721 and<br>ABRT010238720 |
| <i>Thryonomys_swinderianus</i>       | JN632772           | JN414206                                                                                | JN414353      | JN633207                           |
| <i>Tragulus_napu</i>                 | JN632742           | JN414141                                                                                | JN414258      | JN633160                           |
| <i>Trichechus_manatus</i>            | AY011511           | AF284020                                                                                | AHIN01115019  | AY011569                           |
| <i>Trichosurus_vulpecula</i>         | JN632722           | EF025765                                                                                | JN414225      | JN633142                           |
| <i>Tupaia_belangeri</i>              | Ensembl 65         | ALAR01093313                                                                            | ALAR01107530  | Ensembl 65                         |
| <i>Tupaia_minor</i>                  | AY011532           | JN414181                                                                                | JN414317      | AY011594                           |
| <i>Tursiops_truncatus</i>            | AY011545           | Ensembl 65                                                                              | JN414260      | AY011607                           |
| <i>Urogale_everetti</i>              | AF535051 BMI1 gene | XXXXXX                                                                                  | XXXXXX        | EU142166                           |
| <i>Ursus_americanus</i>              | genome             | genome                                                                                  | genome        | genome                             |
| <i>Ursus_arctos</i>                  | AY011557 BMI1      | genome                                                                                  | genome        | genome                             |
| <i>Ursus_maritimus</i>               | Scaffold 88        | Scaffold 222                                                                            | Scaffold 40   | Scaffold 131                       |
| <i>Vicugna_pacos</i>                 | Ensembl 65         | ABRR02024361                                                                            | XM_006208997  | Ensembl 65                         |
| <i>Vombatus_ursinus</i>              | JN632728           | AF284031                                                                                | JN414231      | JN633148                           |
| <i>Allenopithecus_nigroviridis</i>   | XXXXXX             | XXXXXX                                                                                  | HM763634      | HM763165                           |
| <i>Alouatta_sara</i>                 | XXXXXX             | KM017628                                                                                | HM763721      | HM763260                           |
| <i>Anolis_carolinensis</i>           | XXXXXX             | XXXXXX                                                                                  | XXXXXX        | Ensembl                            |
| <i>Cacajao_calvus</i>                | XXXXXX             | XXXXXX                                                                                  | HM763733      | HM763273                           |
| <i>Callimico_goeldii</i>             | AY011538 BMI1      | XXXXXX                                                                                  | HM763708      | HM763245                           |
| <i>Cercocebus_chrysogaster</i>       | XXXXXX             | XXXXXX                                                                                  | HM763636      | HM763166                           |
| <i>Cercopithecus_albogularis</i>     | XXXXXX             | XXXXXX                                                                                  | HM763638      | HM763169                           |
| <i>Cercopithecus_diana</i>           | XXXXXX             | XXXXXX                                                                                  | HM763641      | HM763172                           |
| <i>Cynopterus_brachyotis</i>         | AY834532           | JN398258                                                                                | XXXXXX        | XXXXXX                             |
| <i>Erinaceus_concolor</i>            | AY011506 BMI1      | KF783073 and KF783058                                                                   | XXXXXX        | XXXXXX                             |
| <i>Erythrocebus_patas</i>            | XXXXXX             | XXXXXX                                                                                  | HM763653      | HM763185                           |
| <i>Eulemur_mongoz</i>                | XXXXXX             | XXXXXX                                                                                  | HM763759      | HM763314                           |
| <i>Galago_senegalensis</i>           | XXXXXX             | XXXXXX                                                                                  | HM763761      | HM763326                           |

| Name                            | BMI1          | BRCA1                 | BRCA2    | CNR1         |
|---------------------------------|---------------|-----------------------|----------|--------------|
| <i>Gallus_gallus</i>            | XXXXXX        | XXXXXX                | XXXXXX   | AADN03003306 |
| <i>Graphiurus_murinus</i>       | XXXXXX        | JN414203              | JN414349 | AY303187     |
| <i>Hapalemur_griseus</i>        | XXXXXX        | XXXXXX                | XXXXXX   | HM763316     |
| <i>Hylobates_agilis</i>         | FJ648370 BMI1 | DQ354458              | KM017646 | HM763228     |
| <i>Hylobates_muelleri</i>       | FJ648371 BMI1 | XXXXXX                | HM763694 | HM763231     |
| <i>Lagothrix_lagotricha</i>     | XXXXXX        | XXXXXX                | XXXXXX   | HM763244     |
| <i>Leontopithecus_rosalia</i>   | XXXXXX        | XXXXXX                | HM763716 | HM763255     |
| <i>Macaca_fuscata</i>           | XXXXXX        | XXXXXX                | HM763658 | HM763191     |
| <i>Miopithecus_ogouensis</i>    | XXXXXX        | XXXXXX                | HM763670 | HM763204     |
| <i>Moschus_moschiferus</i>      | JN632740      | JN414139              | JN414255 | JN414369     |
| <i>Neovison_vison</i>           | XXXXXX        | AB285367 and EF472329 | XXXXXX   | GQ844289     |
| <i>Nomascus_concolor</i>        | AY011537 BMI1 | XXXXXX                | XXXXXX   | AY011599     |
| <i>Ochotona_hyperborea</i>      | XXXXXX        | XXXXXX                | XXXXXX   | AY011592     |
| <i>Ornithorhynchus_anatinus</i> | XXXXXX        | XXXXXX                | XXXXXX   | Ensembl      |
| <i>Panthera_onca</i>            | XXXXXX        | AB371332              | XXXXXX   | AY011617     |
| <i>Pongo_pygmaeus</i>           | XXXXXX        | AF019077              | KM017647 | HM763240     |
| <i>Propithecus_diadema</i>      | XXXXXX        | XXXXXX                | HM763757 | HM763307     |
| <i>Pygathrix_nemaeus</i>        | XXXXXX        | XXXXXX                | XXXXXX   | HM763213     |
| <i>Rousettus_lanosus</i>        | AY011542 BMI1 | JN398244              | XXXXXX   | AY011604     |
| <i>Saguinus_fuscicollis</i>     | XXXXXX        | XXXXXX                | HM763741 | HM763283     |
| <i>Saimiri_oerstedii</i>        | XXXXXX        | XXXXXX                | HM763748 | HM763292     |
| <i>Saimiri_sciureus</i>         | XXXXXX        | KM017631              | KM017651 | HM763293     |
| <i>Semnopithecus_entellus</i>   | XXXXXX        | XXXXXX                | HM763682 | HM763216     |
| <i>Sylvilagus_floridanus</i>    | AY011529 BMI1 | XXXXXX                | XXXXXX   | AY011591     |
| <i>Symphalangus_syndactylus</i> | XXXXXX        | KM017626              | KM017650 | HM763234     |
| <i>Tachyglossus_acleatus</i>    | XXXXXX        | XXXXXX                | XXXXXX   | JN633129     |
| <i>Taeniopygia_guttata</i>      | XXXXXX        | XXXXXX                | XXXXXX   | Ensembl      |
| <i>Thyroptera_tricolor</i>      | AY834550      | JN414176              | JN414305 | JN633185     |
| <i>Trachypithecus_francoisi</i> | XXXXXX        | KM017625              | KM017649 | HM763222     |
| <i>Tupaia_glis</i>              | FJ648375 BMI1 | DQ354454              | XXXXXX   | FJ648388     |
| <i>Tamandua_tetradactyla</i>    | XXXXXX        | AF484230              | XXXXXX   | AY011563     |
| <i>Xenopus_tropicalis</i>       | XXXXXX        | XXXXXX                | XXXXXX   | XXXXXX       |

| Name                              | CREM          | DMP1         | EDG1                           | ENAM          |
|-----------------------------------|---------------|--------------|--------------------------------|---------------|
| <i>Abrocoma_bennettii</i>         | JN633501 gene | JN414492     | XXXXXX                         | JN414616      |
| <i>Acinonyx_jubatus</i>           | LLWD01000634  | LLWD01000026 | LLWD01000429                   | LLWD01000793  |
| <i>Acrobates_pygmaeus</i>         | JN633459 gene | JN414389     | XXXXXX                         | GU199281      |
| <i>Aepyprymnus_rufescens</i>      | JN633463 gene | JN414395     | JN633224                       | JN414548      |
| <i>Ailuropoda_melanoleuca</i>     | JN633491 gene | JN414453     | ACTA01041032<br>scaffold382_82 | Ensembl 64    |
| <i>Ailurus_fulgens</i>            | JN633481 gene | JN414442     | XXXXXX                         | JN414561      |
| <i>Amblysomus_hottentotus</i>     | AY059696      | JN414403     | AY059699                       | GQ354862      |
| <i>Anomalurus_beecrofti</i>       | XXXXXX        | JN414494     | JN633263                       | JN414618      |
| <i>Anoura_geoffroyi</i>           | AY839091      | XXXXXX       | AY834566                       | XXXXXX        |
| <i>Antilocapra_americana</i>      | JN633475 gene | JN414419     | JN633237                       | JN414554      |
| <i>Antrozous_pallidus</i>         | AY839093      | GU328210     | AY834568                       | XXXXXX        |
| <i>Aotus_nancymaeae</i>           | HM763021      | JYKP01188236 | HM762431                       | JYKP01103456  |
| <i>Aplodontia_rufa</i>            | JN633502      | JN414495     | JN633264                       | JN414619      |
| <i>Apodemus_sylvaticus</i>        | LIPJ01000726  | LIPJ01004268 | LIPJ01005548                   | LIPJ01003925  |
| <i>Arctocephalus_forsteri</i>     | JN633488 gene | JN414450     | JN633249                       | JN414569      |
| <i>Artibeus_jamaicensis</i>       | AY011665      | JN414463     | AY011726                       | JN414587      |
| <i>Ateles_fusciceps</i>           | HM763026      | JN414482     | AY011721                       | JN414605      |
| <i>Balaena_mysticetus</i>         | scaffold 787  | scaffold 876 | scaffold 2041                  | scaffold 1768 |
| <i>Balaenoptera_acutorostrata</i> | ATDI01081447  | ATDI01179436 | ATDI01126950                   | ATDI01067699  |
| <i>Balaenoptera_bonaerensis</i>   | BAUQ01137455  | BAUQ01162908 | BAUQ01210539                   | BAUQ01083721  |
| <i>Bison_bison</i>                | JPYT01071824  | JPYT01012619 | JPYT01103405                   | JPYT01268710  |
| <i>Bos_grunniens</i>              | AGSK01156755  | AGSK01191877 | AGSK01154971                   | AGSK01085739  |
| <i>Bos_indicus</i>                | AGFL01116819  | AGFL01061218 | AGFL01026434                   | AGFL01059898  |
| <i>Bos_taurus</i>                 | Ensembl 65    | Ensembl 66   | Ensembl 66                     | Ensembl 65    |
| <i>Bradypus_tridactylus</i>       | JN633474 gene | JN414416     | XXXXXX                         | GQ354873      |
| <i>Bubalus_bubalis</i>            | AWWX01571463  | AWWX01576408 | AWWX01613665                   | AWWX01577551  |
| <i>Caenolestes_fuliginosus</i>    | JN633454 gene | JN414384     | JN633216                       | JN414539      |
| <i>Callithrix_jacchus</i>         | HM763043      | JN414483     | Ensembl 66                     | Ensembl 64    |

| Name                                | CREM          | DMP1                                                | EDG1                          | ENAM                                                    |
|-------------------------------------|---------------|-----------------------------------------------------|-------------------------------|---------------------------------------------------------|
| <i>Caluromys philander</i>          | JN633450 gene | DQ083121                                            | JN633212                      | JN414535                                                |
| <i>Camelus bactrianus</i>           | CAOW010249285 | CAOW010515127<br>(without string of internal<br>Ns) | GAEX01007206                  | CAOW010359352 (not<br>including Ns in NCBI<br>sequence) |
| <i>Camelus dromedarius</i>          | JWIN01034202  | GAEA01011035                                        | GAEA01045738                  | JWIN01030039                                            |
| <i>Camelus ferus</i>                | AGVR01042078  | AGVR01006876                                        | AGVR01044026                  | AGVR01039102                                            |
| <i>Canis familiaris</i>             | AY011682      | Ensembl 66                                          | Ensembl 69                    | Ensembl 65                                              |
| <i>Caperea marginata</i>            | JN414370      | JN414430                                            | JN414522                      | GQ354843                                                |
| <i>Capra aegagrus</i>               | CBYH010021763 | CBYH010013146                                       | CBYH010064703                 | CBYH010035630                                           |
| <i>Capra hircus</i>                 | AJPT01132959  | AJPT01072478                                        | AJPT01032744                  | AJPT01071081                                            |
| <i>Capreolus capreolus</i>          | CCMK010004752 | CCMK010117087                                       | CCMK010061642                 | CCMK010291901                                           |
| <i>Capromys pilorides</i>           | XXXXXX        | JN414497                                            | JN633265                      | JN414621                                                |
| <i>Castor canadensis</i>            | AY011640      | JN414499                                            | AY011703                      | JN414623                                                |
| <i>Cavia aperea</i>                 | AVPZ01000333  | AVPZ01000267                                        | AVPZ01000223                  | AVPZ01000422                                            |
| <i>Cavia porcellus</i>              | Ensembl 65    | AAKN02033400                                        | Ensembl 66                    | AAKN02040237                                            |
| <i>Cebus albifrons</i>              | JN633497 gene | JN414484                                            | JN633259                      | JN414607                                                |
| <i>Ceratotherium simum</i>          | AKZM01015302  | JN414478                                            | AY011736                      | AKZM01002861                                            |
| <i>Cercartetus nanus</i>            | JN633460 gene | JN414390                                            | XXXXXX                        | JN414544                                                |
| <i>Cercocebus atys</i>              | JZLG01028994  | JZLG01052265                                        | JZLG01013708                  | XXXXXX                                                  |
| <i>Cervus taiouanus</i>             | JN633476      | JN414421                                            | XXXXXX                        | JN414555                                                |
| <i>Cheirogaleus medius</i>          | HM763066      | XXXXXX                                              | HM762468                      | XXXXXX                                                  |
| <i>Chinchilla lanigera</i>          | AGCD01049169  | JN414501                                            | AGCD01032903                  | AGCD01040538                                            |
| <i>Chlorocebus sabaeus</i>          | AQIB01146370  | AQIB01016643                                        | HM762351                      | AQIB01016288                                            |
| <i>Choloepus didactylus</i>         | AY011623      | XXXXXX                                              | XXXXXX                        | GQ354874                                                |
| <i>Choloepus hoffmanni</i>          | AY011622      | JN414415                                            | AY011687                      | ABVD01596146 (1-702)<br>and GQ354875 (the rest)         |
| <i>Chrysochloris asiatica</i>       | AMDV01230934  | JN414404                                            | JN633231                      | AMDV01278750                                            |
| <i>Colobus angolensis</i>           | HM763070      | JYKR01104582                                        | HM762352                      | EU482100                                                |
| <i>Condylura cristata</i>           | AJFV01064633  | AJFV01033468                                        | AY011693                      | AJFV01034075                                            |
| <i>Craseonycteris thonglongyai</i>  | AY839103      | XXXXXX                                              | AY834578                      | JN414574                                                |
| <i>Cratogeomys castanops</i>        | JN633510      | JN414510                                            | XXXXXX                        | JN414634                                                |
| <i>Cricetulus griseus</i>           | AFTD01034363  | PreEnsembl 66                                       | JN633266                      | AFTD01052903                                            |
| <i>Crocota crocuta</i>              | JN633484 gene | JN414445                                            | JN633245                      | JN414564                                                |
| <i>Ctenodactylus gundi</i>          | JN633505 gene | JN414503                                            | JN633267                      | JN414627                                                |
| <i>Ctenomys boliviensis</i>         | JN633506 gene | JN414504                                            | JN633268                      | JN414628                                                |
| <i>Cuniculus taczanowskii</i>       | AY011654      | JN414493                                            | AY011715                      | JN414617                                                |
| <i>Cyclopes didactylus</i>          | XXXXXX        | JN414418                                            | JN633236                      | GQ354878                                                |
| <i>Cynocephalus volans</i>          | HM763073      | JN414469                                            | AF535062                      | JN414593                                                |
| <i>Cynopterus sphinx</i>            | XXXXXX        | GAOV01126483                                        | GAOV01118209                  | XXXXXX                                                  |
| <i>Dasyprocta punctata</i>          | JN633507      | JN414505                                            | JN633269                      | JN414629                                                |
| <i>Dasyurus novemcinctus</i>        | AAGV03225153  | JN414414                                            | AAGV03178488                  | AAGV03237580                                            |
| <i>Dasyurus albopunctatus</i>       | JN633468 cAMP | JN414400                                            | JN633229                      | JN414551                                                |
| <i>Daubentonia madagascariensis</i> | AGTM011627712 | JN414486                                            | AGTM011956387 and<br>JN633260 | AGTM011576235                                           |
| <i>Delphinapterus leucas</i>        | JN414375      | JN414435                                            | JN414527                      | GQ354848                                                |
| <i>Desmodus rotundus</i>            | AY839090      | AY141888                                            | AY834565                      | XXXXXX                                                  |
| <i>Didelphis yirginiana</i>         | AY011620      | DQ083127                                            | AY011685                      | JN414534                                                |
| <i>Dinomys branickii</i>            | AY011653      | JN414506                                            | XXXXXX                        | JN414630                                                |
| <i>Dipodomys heermanni</i>          | AY011648      | JN414511                                            | AY011710                      | JN414635                                                |
| <i>Dipodomys ordii</i>              | ABRO02009851  | Ensembl 66                                          | ABRO02061725                  | ABRO02034329                                            |
| <i>Dromiciops gliroides</i>         | JN633452 gene | JN414382                                            | JN633214                      | JN414537                                                |
| <i>Dugong dugon</i>                 | JN633472 gene | JN414410                                            | JN633234                      | GQ354868                                                |
| <i>Echinops telfairi</i>            | AAIY01579525  | JN414402                                            | AAIY01698052                  | GQ354864                                                |
| <i>Echymipera kalubu</i>            | JN633458 gene | JN414388                                            | JN633220                      | JN414543                                                |
| <i>Eidolon helvum</i>               | AWHC01207493  | AWHC01194226                                        | AWHC01049879                  | AWHC01252446                                            |
| <i>Elephantulus edwardii</i>        | AMGZ01120850  | AMGZ01081303                                        | AMGZ0104679                   | AMGZ01205762                                            |
| <i>Elephantulus rufescens</i>       | AY011637      | JN414405                                            | AY011700                      | GQ354865                                                |
| <i>Elephas maximus</i>              | JN633473 gene | JN414412                                            | JN633235                      | GQ354871                                                |
| <i>Emballonura atrata</i>           | AY839086      | XXXXXX                                              | AY834562                      | XXXXXX                                                  |
| <i>Eptesicus fuscus</i>             | ALEH01122195  | ALEH01047831                                        | ALEH01070914                  | ALEH01131030                                            |
| <i>Equus asinus</i>                 | JREZ01000287  | JREZ01000199                                        | JREZ01000310                  | JREZ01000259                                            |
| <i>Equus caballus</i>               | AAWR02028558  | AAWR02004809                                        | AY011735                      | Ensembl 65                                              |
| <i>Equus przewalskii</i>            | ATBW01069586  | ATBW01061324                                        | ATBW01018562                  | ATBW01040478                                            |
| <i>Erethizon dorsatum</i>           | AY011647      | JN414509                                            | AY011709                      | JN414633                                                |
| <i>Erinaceus europaeus</i>          | Ensembl 65    | JN414472                                            | Ensembl 66                    | AMDU01090809                                            |
| <i>Eschrichtius robustus</i>        | JN414372      | JN414432                                            | JN414524                      | GQ354844                                                |



| Name                              | CREM                                   | DMP1                                   | EDG1                                   | ENAM                                            |
|-----------------------------------|----------------------------------------|----------------------------------------|----------------------------------------|-------------------------------------------------|
| <i>Eubalaena australis</i>        | JN414371                               | JN414431                               | JN414523                               | GQ354841                                        |
| <i>Eulemur flavifrons</i>         | HM763079                               | LGHW01006277                           | HM762480                               | LGHW01002570                                    |
| <i>Eulemur macaco</i>             | HM763078                               | LGHX01006175                           | HM762479                               | LGHX01002547                                    |
| <i>Eumops auripendulus</i>        | AY839102                               | HQ671563                               | AY834577                               | XXXXXX                                          |
| <i>Euphractus sexcinctus</i>      | AY011624                               | XXXXXX                                 | AY011688                               | GQ354882                                        |
| <i>Felis catus</i>                | ACBE01224633                           | PreEnsembl 66                          | AY011738                               | Ensembl 65 (long gap in middle is string of Ns) |
| <i>Fossa fossana</i>              | JN633482 gene                          | JN414443                               | JN633243                               | JN414562                                        |
| <i>Fukomys damarensis</i>         | AYUG01158877                           | AYUG01141509                           | AYUG01120898                           | AYUG01140118                                    |
| <i>Furipterus horrens</i>         | AY839100                               | XXXXXX                                 | AY834575                               | JN414576                                        |
| <i>Galeopterus variegatus</i>     | AY011656                               | JN414470                               | AY011718                               | JN414594                                        |
| <i>Genetta genetta</i>            | JN633492 gene                          | JN414454                               | JN633253                               | JN414573                                        |
| <i>Glironia venusta</i>           | JN633451 cAMP                          | DQ083128                               | JN633213                               | JN414536                                        |
| <i>Gorilla gorilla</i>            | HM763086                               | Ensembl 66                             | Ensembl 66                             | Ensembl 64                                      |
| <i>Heterocephalus glaber</i>      | AHKG01073053                           | AHKG01096004                           | AY011711                               | AHKG01099858                                    |
| <i>Heterohyrax brucei</i>         | JN633471 gene                          | JN414408                               | JN633233                               | GQ354869                                        |
| <i>Hippopotamus amphibius</i>     | AY011671                               | JN414423                               | AY011731                               | GQ354855                                        |
| <i>Hipposideros commersoni</i>    | AY059698                               | JN414457                               | AY834559                               | JN414577                                        |
| <i>Homo sapiens</i>               | Ensembl 65                             | Ensembl 66                             | AY011725                               | Ensembl 64                                      |
| <i>Hoplomys gymnurus</i>          | JN633509 gene                          | XXXXXX                                 | XXXXXX                                 | JN414632                                        |
| <i>Hydrochoeris hydrochaeris</i>  | AY011651                               | JN414512                               | AY011713                               | JN414636                                        |
| <i>Hydrodamalis gigas</i>         | consensus                              | Stella6852                             | consensus                              | consensus                                       |
| <i>Hylobates lar</i>              | HM763091                               | XXXXXX                                 | HM762397                               | XXXXXX                                          |
| <i>Hypsiprymnodon moschatus</i>   | JN633464 gene                          | JN414396                               | JN633225                               | JN414549                                        |
| <i>Hystrix brachyura</i>          | AY011646                               | XXXXXX                                 | JN633270                               | JN414637                                        |
| <i>Inia geoffrensis</i>           | JN414374                               | JN414434                               | JN414526                               | GQ354851                                        |
| <i>Isodon macrourus</i>           | JN633456 gene                          | JN414386                               | JN633218                               | JN414541                                        |
| <i>Jaculus jaculus</i>            | AKZC01264514                           | JN414507                               | AKZC01133266                           | JN414631 (1-3409) and AKZC01229378 (the rest)   |
| <i>Kogia breviceps</i>            | JN414377                               | JN414437                               | JN414529                               | GQ354846                                        |
| <i>Lama glama</i>                 | AY011672                               | JN414420                               | JN633238                               | GQ354857                                        |
| <i>Laonastes aenigmamus</i>       | JN633513 gene                          | JN414519                               | JN633274                               | JN414644                                        |
| <i>Lemur catta</i>                | HM763096                               | JN414489                               | AY011720                               | JN414613                                        |
| <i>Leptonychotes weddellii</i>    | APMU01074046                           | APMU01004206                           | APMU01019599                           | APMU01028343                                    |
| <i>Lipotes vexillifer</i>         | AUPI01150867                           | AUPI01035141                           | AUPI01027100                           | AUPI01004948                                    |
| <i>Loxodonta africana</i>         | AAGU03083382                           | JN414413                               | AY011698                               | Ensembl 69                                      |
| <i>Macaca fascicularis</i>        | HM763103                               | AEHL01335382                           | AEHL01234708                           | AEHL01332569                                    |
| <i>Macaca mulatta</i>             | HM763106                               | JN414485                               | AY011722                               | Ensembl 65                                      |
| <i>Macaca nemestrina</i>          | HM763107                               | JZLF01083360                           | HM762364                               | JZLF01077137                                    |
| <i>Macroderma gigas</i>           | AY839084                               | XXXXXX                                 | AY834560                               | XXXXXX                                          |
| <i>Macropus eugenii</i>           | ABQO021075319                          | JN414391                               | Ensembl 66                             | JN414545                                        |
| <i>Macroscelides proboscideus</i> | AY011636                               | XXXXXX                                 | AY011699                               | XXXXXX                                          |
| <i>Macrotis lagotis</i>           | JN633457 cAMP                          | JN414387                               | JN633219                               | JN414542                                        |
| <i>Mandrillus leucophaeus</i>     | HM763113                               | JYKQ01135676                           | HM762370                               | JYKQ01177846                                    |
| <i>Manis pentadactyla</i>         | AY011684                               | JN414455                               | AY011742                               | GQ354860                                        |
| <i>Manis tricuspis</i>            | JN633493 gene                          | JN414456                               | JN633254                               | GQ354861                                        |
| <i>Marmota marmota</i>            | CEEU01000013                           | CEEU01000060                           | CEEU01000085                           | CEEU01000104                                    |
| <i>Megaderma lyra</i>             | AY839083                               | JN414458                               | AWHB01444678                           | JN414578                                        |
| <i>Megaptera novaeangliae</i>     | AY011669                               | JN414428                               | AY011729                               | GQ354842                                        |
| <i>Meles meles</i>                | JN633486 gene                          | JN414447                               | JN633247                               | JN414566                                        |
| <i>Mephitis mephitis</i>          | JN633485 gene                          | JN414446                               | JN633246                               | JN414565                                        |
| <i>Mesocricetus auratus</i>       | APMT01179833                           | APMT01104279                           | APMT01109611                           | APMT01036109                                    |
| <i>Mesoplodon bidens</i>          | JN414373                               | JN414433                               | JN414525                               | GQ354853                                        |
| <i>Microcebus murinus</i>         | Ensembl 65                             | XXXXXX                                 | EU142169                               | JN414609                                        |
| <i>Microtus agrestis Northern</i> | WGS specimen from England LIQJ01004067 | WGS specimen from England LIQJ01003835 | WGS specimen from England LIQJ01001063 | WGS specimen from England LIQJ01000061          |
| <i>Microtus ochrogaster</i>       | AHZW01095456                           | AHZW01095939                           | AHZW01030058                           | AHZW01097037                                    |
| <i>Monodelphis domestica</i>      | Ensembl 65                             | Ensembl 66                             | Ensembl 66                             | Ensembl 66                                      |
| <i>Mus musculus</i>               | AAHY01136105                           | Ensembl 66                             | AY011706                               | Ensembl 64                                      |
| <i>Mustela putorius</i>           | PreEnsembl                             | PreEnsembl 66                          | AGTQ01042358                           | PreEnsembl 64                                   |
| <i>Myocastor coypus</i>           | AY011652                               | JN414498                               | AY011714                               | JN414622                                        |
| <i>Myodes glareolus</i>           | LIPi01011087                           | LIPi01008487                           | LIPi01007428                           | LIPi01005543                                    |
| <i>Myotis brandtii</i>            | ANKR01298158                           | ANKR01251879                           | ANKR01278775                           | ANKR01294613                                    |
| <i>Myotis daubentonii</i>         | AY839095                               | XXXXXX                                 | AY834570                               | XXXXXX                                          |
| <i>Myotis davidii</i>             | ALWT01206275                           | ALWT01073095                           | ALWT01098246                           | ALWT01163176                                    |

| Name                             | CREM          | DMP1                                                                                 | EDG1          | ENAM          |
|----------------------------------|---------------|--------------------------------------------------------------------------------------|---------------|---------------|
| <i>Myotis lucifugus</i>          | Ensembl 65    | Ensembl 66                                                                           | Ensembl 66    | Ensembl 65    |
| <i>Myrmecobius fasciatus</i>     | JN633469 gene | JN414401                                                                             | JN633230      | JN414552      |
| <i>Myrmecophaga tridactyla</i>   | AY011627      | JN414417                                                                             | AY011691      | GQ354876      |
| <i>Mystacina tuberculata</i>     | AY839099      | JN414460                                                                             | AY834574      | JN414582      |
| <i>Myzopoda aurita</i>           | AY839096      | AY141882                                                                             | AY834571      | JN414583      |
| <i>Nandinia binotata</i>         | XXXXXX        | JN414448                                                                             | XXXXXX        | JN414567      |
| <i>Nannospalax ehrenbergi</i>    | JN633514 gene | JN414520                                                                             | JN633275      | JN414645      |
| <i>Nannospalax galili</i>        | AXCS01355984  | AXCS01182060                                                                         | AXCS01125007  | AXCS01005380  |
| <i>Nasalis larvatus</i>          | JMHX01319537  | JMHX01319533                                                                         | JMHX01319529  | JMHX01319533  |
| <i>Natalus stramineus</i>        | AY839101      | JN414461                                                                             | AY834576      | JN414584      |
| <i>Noctilio albiventris</i>      | AY839092      | AY141885                                                                             | AY834567      | JN414585      |
| <i>Nomascus leucogenys</i>       | HM763092      | Ensembl 66                                                                           | HM762398      | Ensembl 64    |
| <i>Notoryctes typhlops</i>       | JN633453 gene | JN414383                                                                             | JN633215      | JN414538      |
| <i>Nycteris thebaica</i>         | AY011668      | JN414462                                                                             | XXXXXX        | JN414586      |
| <i>Nycticebus coucang</i>        | JN633500 gene | JN414490                                                                             | JN633262      | JN414614      |
| <i>Nyctimene albiventer</i>      | AY839081      | JN414465                                                                             | AY834557      | JN414589      |
| <i>Ochotona princeps</i>         | Ensembl 65    | JN414471                                                                             | Ensembl 66    | ALIT01098127  |
| <i>Octodon degus</i>             | AJSA01173387  | AJSA01060548                                                                         | AJSA01125889  | AJSA01221660  |
| <i>Octodontomys gliroides</i>    | JN633511 gene | JN414514                                                                             | XXXXXX        | JN414639      |
| <i>Odobenus rosmarus</i>         | JN633487 gene | JN414449                                                                             | ANOP01018174  | ANOP01002847  |
| <i>Okapia johnstoni</i>          | AY011675      | JN414422                                                                             | AY011734      | JN414556      |
| <i>Orcinus orca Norway</i>       | ANOL01041906  | ANOL01014635                                                                         | ANOL01002842  | ANOL01069129  |
| <i>Orycteropus afer</i>          | ALYB01117538  | JN414407                                                                             | AY011701      | ALYB01124787  |
| <i>Oryctolagus cuniculus</i>     | Ensembl 65    | Ensembl 66                                                                           | Ensembl 66    | Ensembl 65    |
| <i>Otolemur garnettii</i>        | AAQR03043815  | JN414487                                                                             | AF535063      | Ensembl 65    |
| <i>Ovis aries</i>                | AMGL01024152  | AMGL01100089                                                                         | AMGL0100368   | AMGL01099452  |
| <i>Pan paniscus</i>              | HM763123      | AJFE01035286                                                                         | AJFE01025531  | EU482101      |
| <i>Pan troglodytes</i>           | HM763124      | Ensembl 66                                                                           | Ensembl 66    | Ensembl 64    |
| <i>Panthera tigris</i>           | ATCQ01117321  | ATCQ01010553                                                                         | ATCQ01121509  | ATCQ01083739  |
| <i>Pantholops hodgsonii</i>      | Scaffold 425  | Scaffold 904                                                                         | Scaffold 64   | Scaffold 888  |
| <i>Papio anubis</i>              | AHZZ01014696  | AHZZ01070697                                                                         | HM762374      | EU482099      |
| <i>Papio hamadryas</i>           | HM763126      | PreEnsembl 66                                                                        | PreEnsembl 66 | PreEnsembl 66 |
| <i>Pecari tajacu</i>             | XXXXXX        | JN414426                                                                             | JN633240      | JN414558      |
| <i>Pedetes capensis</i>          | AY011642      | JN414515                                                                             | AY011705      | JN414640      |
| <i>Peromyscus maniculatus</i>    | AYHN01112767  | AYHN01026725                                                                         | AYHN01037680  | AYHN01109583  |
| <i>Petaurus breviceps</i>        | JN633461 gene | JN414392                                                                             | JN633221      | GU199289      |
| <i>Petromus typicus</i>          | JN633512      | JN414516                                                                             | JN633272      | JN414641      |
| <i>Phascolarctos cinereus</i>    | XXXXXX        | JN414394                                                                             | JN633223      | JN414547      |
| <i>Phoca vitulina</i>            | JN633489 gene | JN414451                                                                             | JN633250      | JN414570      |
| <i>Phocoena phocoena</i>         | JN414376      | JN414436                                                                             | JN414528      | GQ354849      |
| <i>Physeter macrocephalus</i>    | JN414378      | JN414438                                                                             | JN414530      | GQ354847      |
| <i>Pithecia pithecia</i>         | HM763130      | XXXXXX                                                                               | HM762466      | XXXXXX        |
| <i>Platanista minor</i>          | JN414379      | JN414439                                                                             | JN414531      | GQ354854      |
| <i>Podogymnura truei</i>         | JN633496 gene | JN414473                                                                             | JN633256      | JN414597      |
| <i>Pongo abelii</i>              | Ensembl 65    | Ensembl 66                                                                           | Ensembl 66    | Ensembl 64    |
| <i>Pontoporia blainvillei</i>    | JN414380      | JN414440                                                                             | JN414532      | GQ354852      |
| <i>Prionodon linsang</i>         | JN633480 gene | JN414441                                                                             | JN633242      | JN414560      |
| <i>Procavia capensis</i>         | ABRQ01140422  | JN414409                                                                             | AY011697      | ABRQ01122118  |
| <i>Procyon lotor</i>             | JN633490 gene | JN414452                                                                             | JN633251      | JN414571      |
| <i>Propithecus coquereli</i>     | HM763139      | Propithecus_verreauxi in GenBank, but P. v. coquereli based on CRES papers. JN414488 | HM762477      | JZKE01245444  |
| <i>Propithecus verreauxi</i>     | HM763138      | XXXXXX                                                                               | HM762476      | XXXXXX        |
| <i>Pseudochirops cupreus</i>     | JN633465 gene | JN414397                                                                             | JN633226      | JN414550      |
| <i>Pteronotus parnellii</i>      | AY839097      | AY141881                                                                             | AWGZ01066017  | JN414581      |
| <i>Pteropus alecto</i>           | ALWS01040371  | ALWS01037027                                                                         | ALWS01087158  | ALWS01074157  |
| <i>Pteropus giganteus</i>        | AY011666      | JN414464                                                                             | AY011727      | JN414588      |
| <i>Pteropus vampyrus</i>         | Ensembl 65    | Ensembl 66                                                                           | ABRP01081778  | Ensembl 65    |
| <i>Ptilocercus lowii</i>         | EU142168      | JN414480                                                                             | JN633258      | JN414603      |
| <i>Rattus norvegicus</i>         | AABR06092015  | Ensembl 66                                                                           | Ensembl 66    | Ensembl 66    |
| <i>Rhinolophus creaghi</i>       | AY839082      | JN414466                                                                             | AY834558      | JN414590      |
| <i>Rhinolophus ferrumequinum</i> | AWHA01055806  | AWHA01290380                                                                         | AWHA01140931  | AWHA01228077  |
| <i>Rhinopithecus roxellana</i>   | JABR01091119  | JABR01080445                                                                         | JABR01016079  | JABR01008159  |
| <i>Rhinopoma hardwickii</i>      | AY839085      | JN414467                                                                             | XXXXXX        | JN414591      |
| <i>Rhogeessa tumida</i>          | AY839094      | GU328275                                                                             | AY834569      | XXXXXX        |

| Name                                 | CREM          | DMP1          | EDG1          | ENAM         |
|--------------------------------------|---------------|---------------|---------------|--------------|
| <i>Rhynchocyon petersi</i>           | JN633470 gene | JN414406      | JN633232      | GQ354866     |
| <i>Rhyncholestes raphanurus</i>      | JN633455 gene | JN414385      | JN633217      | JN414540     |
| <i>Saccopteryx bilineata</i>         | JN633494 gene | AY141878      | XXXXX         | JN414575     |
| <i>Saimiri boliviensis</i>           | PreEnsembl    | PreEnsembl 66 | Preensembl 66 | AGCE01074317 |
| <i>Sarcophilus harrisii</i>          | Ensembl 65    | Ensembl 66    | Ensembl 66    | Ensembl 64   |
| <i>Solenodon paradoxus</i>           | AY530072      | JN414474      | AY530073      | JN414598     |
| <i>Sorex araneus</i>                 | AALT02045803  | JN414475      | AY011694      | AALT02152376 |
| <i>Spermophilus tridecemlineatus</i> | PreEnsembl    | PreEnsembl 66 | AGTP01102637  | Ensembl 65   |
| <i>Suricata suricatta</i>            | JN633483 gene | JN414444      | JN633244      | JN414563     |
| <i>Sus scrofa</i>                    | AY011674      | JN414425      | AY011733      | GQ354856     |
| <i>Tadarida brasiliensis</i>         | AY059697      | AY141879      | AY059700      | JN414580     |
| <i>Talpa altaica</i>                 | AY011629      | JN414476      | JN633257      | JN414600     |
| <i>Tamias striatus</i>               | AY011639      | JN414517      | AY011702      | JN414642     |
| <i>Tapirus indicus</i>               | AY011678      | JN414479      | AY011737      | JN414602     |
| <i>Tarsipes rostratus</i>            | JN633466 gene | JN414398      | JN633227      | GU199302     |
| <i>Tarsius bancanus</i>              | HM763154      | XXXXX         | EF104982      | XXXXX        |
| <i>Tarsius syrichta</i>              | ABRT010327389 | JN414491      | ABRT02440832  | Ensembl 65   |
| <i>Thryonomys swinderianus</i>       | XXXXX         | JN414518      | JN633273      | JN414643     |
| <i>Tragulus napu</i>                 | JN633479 gene | JN414427      | JN633241      | JN414559     |
| <i>Trichechus manatus</i>            | AHIN01128106  | JN414411      | AY011696      | AHIN01095756 |
| <i>Trichosurus vulpecula</i>         | JN633462 gene | JN414393      | JN633222      | JN414546     |
| <i>Tupaia belangeri</i>              | AAPY01131061  | Ensembl 66:   | ALAR01174834  | Ensembl 65   |
| <i>Tupaia minor</i>                  | HM763163      | JN414481      | AY011719      | JN414604     |
| <i>Tursiops truncatus</i>            | ABRN02544083  | JN414429      | AY011730      | GQ354850     |
| <i>Urogale everetti</i>              | FJ55493       | XXXXX         | AF535061      | XXXXX        |
| <i>Ursus americanus</i>              | genome        | genome        | genome        | genome       |
| <i>Ursus arctos</i>                  | AY011683      | genome        | genome        | genome       |
| <i>Ursus maritimus</i>               | Scaffold 82   | Scaffold 188  | Scaffold 70   | Scaffold 65  |
| <i>Vicugna pacos</i>                 | ABRR02153692  | Ensembl 66    | ABRR02009192  | ABRR01057903 |
| <i>Vombatus ursinus</i>              | JN633467 gene | JN414399      | JN633228      | GQ354839     |
| <i>Allenopithecus nigroviridis</i>   | HM763014      | XXXXX         | HM762335      | XXXXX        |
| <i>Alouatta sara</i>                 | HM763018      | XXXXX         | HM762426      | XXXXX        |
| <i>Anolis carolinensis</i>           | XXXXX         | XXXXX         | Ensembl 66    | XXXXX        |
| <i>Cacajao calvus</i>                | XXXXX         | XXXXX         | HM762439      | XXXXX        |
| <i>Callimico goeldii</i>             | HM763039      | XXXXX         | AY011724      | XXXXX        |
| <i>Cercocebus chrysogaster</i>       | HM763054      | XXXXX         | HM762336      | XXXXX        |
| <i>Cercopithecus albogularis</i>     | HM763056      | XXXXX         | HM762339      | XXXXX        |
| <i>Cercopithecus diana</i>           | HM763059      | XXXXX         | HM762342      | XXXXX        |
| <i>Cynopterus brachyotis</i>         | AY839080      | XXXXX         | AY834556      | XXXXX        |
| <i>Erinaceus concolor</i>            | AY011628      | XXXXX         | AY011692      | XXXXX        |
| <i>Erythrocebus patas</i>            | HM763075      | XXXXX         | HM762355      | XXXXX        |
| <i>Eulemur mongoz</i>                | HM763080      | XXXXX         | HM762481      | XXXXX        |
| <i>Galago senegalensis</i>           | HM763084      | XXXXX         | HM762493      | XXXXX        |
| <i>Gallus gallus</i>                 | XXXXX         | XXXXX         | Ensembl 66    | XXXXX        |
| <i>Graphiurus murinus</i>            | XXXXX         | JN414513      | JN633271      | JN414638     |
| <i>Haplemur griseus</i>              | HM763087      | XXXXX         | HM762483      | XXXXX        |
| <i>Hylobates agilis</i>              | HM763090      | XXXXX         | HM762396      | XXXXX        |
| <i>Hylobates muelleri</i>            | HM763093      | XXXXX         | HM762399      | XXXXX        |
| <i>Lagothrix lagotricha</i>          | HM763095      | XXXXX         | HM762412      | EU482106     |
| <i>Leontopithecus rosalia</i>        | HM763098      | XXXXX         | HM762421      | XXXXX        |
| <i>Macaca fuscata</i>                | HM763104      | XXXXX         | HM762361      | XXXXX        |
| <i>Miopithecus ogouensis</i>         | HM763117      | XXXXX         | HM762372      | XXXXX        |
| <i>Moschus moschiferus</i>           | JN633477 gene | XXXXX         | JN414533      | XXXXX        |
| <i>Neovison vison</i>                | XXXXX         | XXXXX         | XXXXX         | XXXXX        |
| <i>Nomascus concolor</i>             | HM763119      | XXXXX         | AY011723      | XXXXX        |
| <i>Ochotona hyperborea</i>           | AY011655      | XXXXX         | AY011717      | XXXXX        |
| <i>Ornithorhynchus anatinus</i>      | AAPN01000359  | XXXXX         | Ensembl 66    | XXXXX        |
| <i>Panthera onca</i>                 | AY011681      | XXXXX         | AY011740      | XXXXX        |
| <i>Pongo pygmaeus</i>                | HM763131      | AY091976      | HM762408      | XXXXX        |
| <i>Propithecus diadema</i>           | HM763135      | XXXXX         | HM762473      | XXXXX        |
| <i>Pygathrix nemaus</i>              | HM763141      | XXXXX         | HM762381      | XXXXX        |
| <i>Rousettus lanosus</i>             | AY011667      | XXXXX         | AY011728      | XXXXX        |
| <i>Saguinus fuscicollis</i>          | HM763144      | XXXXX         | HM762450      | XXXXX        |
| <i>Saimiri oerstedii</i>             | HM763148      | XXXXX         | HM762459      | XXXXX        |
| <i>Saimiri sciureus</i>              | HM763149      | XXXXX         | HM762460      | XXXXX        |
| <i>Semnopithecus entellus</i>        | HM763151      | XXXXX         | HM762384      | XXXXX        |

| Name                            | CREM          | DMP1     | EDG1       | ENAM     |
|---------------------------------|---------------|----------|------------|----------|
| <i>Sylvilagus_floridanus</i>    | JN633495 gene | XXXXXX   | AY011716   | XXXXXX   |
| <i>Symphalangus_syndactylus</i> | HM763153      | XXXXXX   | HM762402   | EU482104 |
| <i>Tachyglossus_aculeatus</i>   | XXXXXX        | XXXXXX   | JN633211   | XXXXXX   |
| <i>Taeniopygia_guttata</i>      | XXXXXX        | XXXXXX   | Ensembl 66 | XXXXXX   |
| <i>Thyroptera_tricolor</i>      | AY839098      | AY141890 | AY834573   | JN414592 |
| <i>Trachypithecus_francoisi</i> | HM763157      | XXXXXX   | HM762390   | XXXXXX   |
| <i>Tupaia_glis</i>              | HM763162      | XXXXXX   | HM762499   | XXXXXX   |
| <i>Tamandua_tetradactyla</i>    | AY011626      | XXXXXX   | AY011690   | GQ354877 |
| <i>Xenopus_tropicalis</i>       | XXXXXX        | XXXXXX   | Ensembl 66 | XXXXXX   |

| Name                              | FBN1          | GHR                   | IRBP          | PLCB4         |
|-----------------------------------|---------------|-----------------------|---------------|---------------|
| <i>Abrocoma_bennettii</i>         | JN632841      | FJ855213 strain H5613 | JN414810      | JN633111      |
| <i>Acinonyx_jubatus</i>           | GU931044      | LLWD01000247          | LLWD01000093  | LLWD01000430  |
| <i>Acrobates_pygmaeus</i>         | JN632786      | JN414667              | FJ603126      | JN633070      |
| <i>Aepyprymnus_rufescens</i>      | JN632791      | JN414673              | EU160448      | XXXXXX        |
| <i>Ailuropoda_melanoleuca</i>     | GU931084      | AF395535              | Ensembl 65    | Ensembl 70    |
| <i>Ailurus_fulgens</i>            | GU931080      | JN414710              | AY525045      | XXXXXX        |
| <i>Amblysomus_hottentotus</i>     | XXXXXX        | JN414680              | XXXXXX        | AY059706      |
| <i>Anomalurus_becrofti</i>        | JN632843      | JN414755              | JN414812      | JN633112      |
| <i>Anoura_geoffroyi</i>           | XXXXXX        | XXXXXX                | XXXXXX        | AY835951      |
| <i>Antilocapra_americana</i>      | JN632807      | JN414688              | JN414770      | JN633087      |
| <i>Antrozous_pallidus</i>         | XXXXXX        | XXXXXX                | XXXXXX        | AY835953      |
| <i>Aotus_nancymaeae</i>           | HM761929      | JYKP01173418          | JYKP01146951  | HM759729      |
| <i>Aplodontia_rufa</i>            | JN632844      | AF332030              | AJ427238      | JN633113      |
| <i>Apodemus_sylvaticus</i>        | LIPJ01003017  | KM397258              | LIPJ01010088  | LIPJ01009250  |
| <i>Arctocephalus_forsteri</i>     | GU931076      | JN414716              | DQ205888      | GU167492      |
| <i>Artibeus_jamaicensis</i>       | JN632828      | JN414734              | JN414794      | AY011789      |
| <i>Ateles_fusciceps</i>           | EU142178      | JN414745              | JN414808      | HM759843      |
| <i>Balaena_mysticetus</i>         | scaffold 1611 | scaffold 359          | scaffold 1658 | scaffold 3427 |
| <i>Balaenoptera_acutorostrata</i> | ATDI01030138  | ATDI01025852          | ATDI01026708  | ATDI01004419  |
| <i>Balaenoptera_bonaerensis</i>   | BAUQ01172865  | BAUQ01204439          | BAUQ01003824  | BAUQ01416273  |
| <i>Bison_bison</i>                | JPYT01767291  | DQ062723              | JPYT01042888  | JPYT01268367  |
| <i>Bos_grunniens</i>              | AGSK01047172  | DQ062721              | AGSK01015481  | AGSK01000662  |
| <i>Bos_indicus</i>                | AGFL01095111  | DQ062700              | AGFL01202575  | AGFL01115697  |
| <i>Bos_taurus</i>                 | Ensembl 66    | X70041                | Ensembl 65    | Ensembl 66    |
| <i>Bradypus_tridactylus</i>       | JN632805      | JN414686              | BTU48708      | JN633085      |
| <i>Bubalus_bubalis</i>            | AWWX01588498  | EF207441              | AWWX01615231  | AWWX01574260  |
| <i>Caenolestes_fuliginosus</i>    | JN632781      | JN414663              | AF025381      | JN633065      |
| <i>Callithrix_jacchus</i>         | Ensembl 66    | JN414746              | XM_002756138  | HM759872      |
| <i>Caluromys_philander</i>        | JN632777      | JN414659              | AY233765 V823 | JN633062      |
| <i>Camelus_bactrianus</i>         | CAOW010485641 | CAOW010514524         | JARL01027836  | CAOW010219092 |
| <i>Camelus_dromedarius</i>        | JWIN01032145  | JWIN01031792          | JDVD01065352  | JWIN01030888  |
| <i>Camelus_ferus</i>              | AGVR01047666  | AGVR01049780          | AGVR01052084  | AGVR01035622  |
| <i>Canis_familiaris</i>           | Ensembl 66    | NM_001003123          | Ensembl 69    | Ensembl 69    |
| <i>Caperea_marginata</i>          | JN414647      | JN414698              | JN414777      | JN414827      |
| <i>Capra_aegagrus</i>             | CBYH010038877 | CBYH010062073         | CBYH010014477 | CBYH010060790 |
| <i>Capra_hircus</i>               | AJPT01108908  | AJPT01183945          | AJPT01227388  | AJPT01131552  |
| <i>Capreolus_capreolus</i>        | CCMK010078275 | CCMK010166842         | XXXXXX        | CCMK010039675 |
| <i>Capromys_pilorides</i>         | JN632846      | AF433949              | JN414813      | JN633114      |
| <i>Castor_canadensis</i>          | EU142171      | AF332026              | AJ427239      | AY011763      |
| <i>Cavia_aperea</i>               | XXXXXX        | AF433930              | AVPZ01000589  | AVPZ01000889  |
| <i>Cavia_porcellus</i>            | Ensembl 66    | NM_001172706          | Ensembl 65    | Ensembl 66    |
| <i>Cebus_albifrons</i>            | JN632837      | JN414747              | JN414809      | JN633107      |
| <i>Ceratotherium_simum</i>        | JN632835      | JN414743              | JN414804      | AY011800      |
| <i>Cercartetus_nanus</i>          | JN632787      | JN414668              | EU160449      | JN633071      |
| <i>Cercocebus_atys</i>            | JZLG01009804  | JZLG01066710          | JZLG01016764  | JZLG01064076  |
| <i>Cervus_taiouanus</i>           | JN632809      | JN414689              | JN414771      | JN633088      |
| <i>Cheirogaleus_medius</i>        | HM761964      | HM761354              | EU342269      | HM759867      |
| <i>Chinchilla_lanigera</i>        | JN632848      | AF332036              | AJ427246      | JN633115      |
| <i>Chlorocebus_sabaeus</i>        | HM761851      | AQIB01112046          | AQIB01149139  | AQIB01150998  |
| <i>Choloepus_didactylus</i>       | XXXXXX        | XXXXXX                | FR871851      | AY011746      |
| <i>Choloepus_hoffmanni</i>        | KC113267      | JN414685              | JN414767      | AY011745      |
| <i>Chrysochloris_asiatica</i>     | JN632798      | JN414681              | XXXXXX        | JN633081      |

| Name                                | FBN1         | GHR                     | IRBP           | PLCB4         |
|-------------------------------------|--------------|-------------------------|----------------|---------------|
| <i>Colobus_angolensis</i>           | HM761852     | JX856189                | JX856189       | HM759791      |
| <i>Condylura_cristata</i>           | AJFV01055694 | AJFV01021794            | XXXXXX         | AY011753      |
| <i>Craseonycteris_thonglongyai</i>  | JN632818     | JN414722                | JN414786       | KP175938      |
| <i>Cratogeomys_castanops</i>        | JN632857     | AF332027                | EU551778       | JN633121      |
| <i>Cricetulus_griseus</i>           | JN632849     | JN414756                | Pre-Ensembl 64 | PreEnsembl 67 |
| <i>Crocota_crocota</i>              | GU931049     | JN414713                | AY170087       | JN633094      |
| <i>Ctenodactylus_gundi</i>          | JN632850     | XXXXXX                  | JN414815       | JN633116      |
| <i>Ctenomys_boliviensis</i>         | JN632851     | JN414757                | JN414816       | JN633117      |
| <i>Cuniculus_taczanowskii</i>       | JN632842     | AF433929                | JN414811       | AY011777      |
| <i>Cyclopes_didactylus</i>          | JN632806     | JN414687                | JN414769       | JN633086      |
| <i>Cynocephalus_volans</i>          | EU213053     | AF332019                | JN414800       | HM759799      |
| <i>Cynopterus_sphinx</i>            | XXXXXX       | GAOV01083201            | CSU48709       | XXXXXX        |
| <i>Dasyprocta_punctata</i>          | JN632852     | AF433943                | JN414817       | JN633118      |
| <i>Dasyurus_novemcinctus</i>        | AAGV03016414 | Ensembl 65              | XXXXXX         | AAGV03171491  |
| <i>Dasyurus_albopunctatus</i>       | JN632796     | JN414678                | AY532681       | JN633079      |
| <i>Daubentonia_madagascariensis</i> | JN632838     | JN414749                | AJ313468       | AGTM011640438 |
| <i>Delphinapterus_leucas</i>        | JN414652     | JN414703                | AF231341       | JN414832      |
| <i>Desmodus_rotundus</i>            | XXXXXX       | KM190094                | XXXXXX         | AY835950      |
| <i>Didelphis_virginiana</i>         | JN632776     | XXXXXX                  | Z11814         | AY011743      |
| <i>Dinomys_branickii</i>            | JN632853     | AF332038                | AM050862       | AY011776      |
| <i>Dipodomys_heermanni</i>          | JN632858     | JN414759                | JN414820       | AY011771      |
| <i>Dipodomys_ordini</i>             | Ensembl 66   | Ensembl 65              | Ensembl 65     | ABRO02013077  |
| <i>Dromiciops_gliroides</i>         | JN632779     | JN414661                | AF025384       | EF104981      |
| <i>Dugong_dugon</i>                 | JN632802     | JN414684                | DDU48583       | MD118         |
| <i>Echinops_telfairi</i>            | AAIY02177132 | AF392889                | XXXXXX         | AY011755      |
| <i>Echymipera_kalubu</i>            | JN632785     | XXXXXX                  | AF025383       | JN633069      |
| <i>Eidolon_helvum</i>               | AWHC01046462 | AWHC01010176            | AWHC01202409   | AWHC01026946  |
| <i>Elephantulus_edwardii</i>        | AMGZ01190676 | AMGZ01126162            | AY310899       | AMGZ01175319  |
| <i>Elephantulus_rufescens</i>       | JX869931     | AF392876                | ERU48584       | XXXXXX        |
| <i>Elephas_maximus</i>              | JN632804     | AF332013                | AY243443       | JN633084      |
| <i>Emballonura_atrata</i>           | XXXXXX       | JN414723                | XXXXXX         | AY835946      |
| <i>Eptesicus_fuscus</i>             | ALEH01043269 | ALEH01118438            | ALEH01080398   | ALEH01033989  |
| <i>Equus_asinus</i>                 | JREZ01000114 | JREZ01000037            | JREZ01000188   | JREZ01000071  |
| <i>Equus_caballus</i>               | Ensembl 66   | AF392878                | Ensembl 65     | AAWR02026310  |
| <i>Equus_przewalskii</i>            | ATBW01047071 | ATBW01029035            | ATBW01039778   | ATBW01045679  |
| <i>Erethizon_dorsatum</i>           | JN632856     | FJ855211 strain H5828   | AJ427249       | AY011770      |
| <i>Erinaceus_europaeus</i>          | Ensembl 66   | AF392882                | Ensembl 65     | Ensembl 66    |
| <i>Eschrichtius_robustus</i>        | JN414649     | JN414700                | ERU50649       | JN414829      |
| <i>Eubalaena_australis</i>          | JN414648     | JN414699                | JN414778       | JN414828      |
| <i>Eulemur_flavifrons</i>           | HM761976     | LGHW01002193            | LGHW01004070   | LGHW01001671  |
| <i>Eulemur_macaco</i>               | HM761975     | JX856191                | LGHX01004022   | LGHX01001656  |
| <i>Eumops_auripendulus</i>          | XXXXXX       | XXXXXX                  | XXXXXX         | AY835962      |
| <i>Euphractus_sexinctus</i>         | XXXXXX       | XXXXXX                  | XXXXXX         | AY011747      |
| <i>Felis_catus</i>                  | GU931043     | EU448991                | Ensembl 65     | AANG02087572  |
| <i>Fossa_fossana</i>                | GU931058     | JN414711                | AY170067       | JN633092      |
| <i>Fukomys_damarensis</i>           | AYUG01107642 | AYUG01110355            | AYUG01089468   | AYUG01118254  |
| <i>Furipterus_horrens</i>           | JN632820     | XXXXXX                  | XXXXXX         | AY835960      |
| <i>Galeopterus_variegatus</i>       | EU142175     | AF540625                | Z11807         | HM759751      |
| <i>Genetta_genetta</i>              | GU931061     | JN414720                | JN414783       | JN633102      |
| <i>Glironia_venusta</i>             | JN632778     | JN414660                | AF257688       | JN633063      |
| <i>Gorilla_gorilla</i>              | Ensembl 66   | Ensembl 65              | Ensembl 65     | Ensembl 67    |
| <i>Heterocephalus_glaber</i>        | AFSB01237323 | AF332034                | AM407925       | AHKG01019105  |
| <i>Heterohyrax_brucei</i>           | JN632801     | JN414683                | JN414766       | JN633083      |
| <i>Hippopotamus_amphibius</i>       | JN632811     | JN414691                | AF108837       | AY011794      |
| <i>Hipposideros_commerioni</i>      | JN632821     | JN414725                | JN414788       | AY835943      |
| <i>Homo_sapiens</i>                 | Ensembl 66   | NM_001242461            | Ensembl 66     | Ensembl 67    |
| <i>Hoplomys_gymnurus</i>            | JN632855     | AF520661                | JN414818       | JN633120      |
| <i>Hydrochoeris_hydrochaeris</i>    | JN632859     | AF433948                | JN414821       | AY011774      |
| <i>Hydrodamalis_gigas</i>           | consensus    | consensus               | consensus      |               |
| <i>Hylobates_lar</i>                | HM761898     | HM761450                | AJ313478       | HM759758      |
| <i>Hypsiprymnodon_moschatus</i>     | JN632792     | JN414674                | FJ603129       | JN633075      |
| <i>Hystrix_brachyura</i>            | JN632860     | JN414760                | JN414822       | AY011769      |
| <i>Inia_geoffrensis</i>             | JN414651     | JN414702                | AF304080       | JN414831      |
| <i>Isodon_macrourus</i>             | JN632783     | JN414665 from Australia | EU160450       | JN633067      |
| <i>Jaculus_jaculus</i>              | JN632854     | KM397231                | AM407907       | AKZC01173276  |
| <i>Kogia_breviceps</i>              | JN414654     | JN414705                | JN414780       | JN414834      |

| Name                              | FBN1                                         | GHR                                          | IRBP                                                               | PLCB4                                        |
|-----------------------------------|----------------------------------------------|----------------------------------------------|--------------------------------------------------------------------|----------------------------------------------|
| <i>Lama glama</i>                 | JN632808                                     | EU448989                                     | AF108836                                                           | AY011795                                     |
| <i>Laonastes aenigmamus</i>       | JN632865                                     | AM407901                                     | AM407903                                                           | JN633126                                     |
| <i>Lemur catta</i>                | EU142176                                     | JN414751                                     | AJ313470                                                           | HM759781                                     |
| <i>Leptonychotes weddellii</i>    | APMU01077584                                 | APMU01142293                                 | APMU01138879                                                       | APMU01054404                                 |
| <i>Lipotes vexillifer</i>         | AUPI01121670                                 | AUPI01014709                                 | AUPI01052371                                                       | AUPI01044211                                 |
| <i>Loxodonta africana</i>         | AAGU03079604                                 | AF332012                                     | Ensembl 65                                                         | AAGU03041141                                 |
| <i>Macaca fascicularis</i>        | HM761860                                     | CAEC01535400                                 | AEHL01411592                                                       | HM759810                                     |
| <i>Macaca mulatta</i>             | EU142179                                     | NM_001042667                                 | Ensembl 56                                                         | Ensembl 67                                   |
| <i>Macaca nemestrina</i>          | HM761864                                     | JZLF01016156                                 | JZLF01014962                                                       | HM759846                                     |
| <i>Macroderma gigas</i>           | XXXXXX                                       | XXXXXX                                       | XXXXXX                                                             | AY835944                                     |
| <i>Macropus eugenii</i>           | Ensembl 66                                   | JN414669                                     | FJ603206                                                           | Ensembl 67                                   |
| <i>Macroscelides proboscideus</i> | XXXXXX                                       | AF332014                                     | KF742669                                                           | XXXXXX                                       |
| <i>Macrotis lagotis</i>           | JN632784                                     | JN414666                                     | EU369364                                                           | JN633068                                     |
| <i>Mandrillus leucophaeus</i>     | HM761872                                     | JX856200                                     | JX856200                                                           | HM759803                                     |
| <i>Manis pentadactyla</i>         | GU931086                                     | EU448992                                     | JN414784                                                           | AY011807                                     |
| <i>Manis tricuspis</i>            | JN632817                                     | JN414721                                     | JN414785                                                           | JN633103                                     |
| <i>Marmota marmota</i>            | CEEU01000008                                 | CEEU01000028                                 | CEEU01000058                                                       | CEEU01000001                                 |
| <i>Megaderma lyra</i>             | JN632822                                     | JN414726                                     | AY057833                                                           | AY059708                                     |
| <i>Megaptera novaeangliae</i>     | JN632815                                     | JN414696                                     | AF304086                                                           | AY011792                                     |
| <i>Meles meles</i>                | GU931072                                     | JN414715                                     | AB082979                                                           | EF987926                                     |
| <i>Mephitis mephitis</i>          | GU931066                                     | JN414714                                     | AB109331                                                           | JN633095                                     |
| <i>Mesocricetus auratus</i>       | APMT01040071                                 | APMT01189701                                 | APMT01115854                                                       | APMT01040792                                 |
| <i>Mesoplodon bidens</i>          | JN414650                                     | JN414701                                     | JN414779                                                           | JN414830                                     |
| <i>Microcebus murinus</i>         | Ensembl 66                                   | JN414748                                     | AJ313469                                                           | Ensembl 67                                   |
| <i>Microtus agrestis Northern</i> | WGS specimen from<br>England<br>LIQJ01000395 | WGS specimen from<br>England<br>LIQJ01001641 | LIQJ01001607                                                       | WGS specimen from<br>England<br>LIQJ01001059 |
| <i>Microtus ochrogaster</i>       | AHZW01122347                                 | AHZW01161163                                 | AHZW01065200                                                       | AHZW01071206                                 |
| <i>Monodelphis domestica</i>      | Ensembl 66                                   | Ensembl 73                                   | KM071083                                                           | Ensembl 67                                   |
| <i>Mus musculus</i>               | CAAA01211762                                 | Ensembl 65                                   | Ensembl 65                                                         | Ensembl 66                                   |
| <i>Mustela putorius</i>           | PreEnsembl 66                                | PreEnsembl 65                                | Pre-Ensembl 65                                                     | AEYP01029232                                 |
| <i>Myocastor coypus</i>           | JN632847                                     | AF520662                                     | JN414814                                                           | AY011775                                     |
| <i>Myodes glareolus</i>           | LIPI01005299                                 | AM392384                                     | LIPI01004555                                                       | LIPI01006998                                 |
| <i>Myotis brandtii</i>            | ANKR01192274                                 | ANKR01263010                                 | ANKR01178541                                                       | ANKR01257193                                 |
| <i>Myotis daubentonii</i>         | XXXXXX                                       | XXXXXX                                       | XXXXXX                                                             | AY835955                                     |
| <i>Myotis davidii</i>             | ALWT01091714                                 | ALWT01205624                                 | ALWT01044936                                                       | ALWT01053620                                 |
| <i>Myotis lucifugus</i>           | Ensembl 66                                   | Ensembl 65                                   | AAPE02051274 (5'<br>fragment) and<br>AAPE02051273 (3'<br>fragment) | Ensembl 67                                   |
| <i>Myrmecobius fasciatus</i>      | JN632797                                     | JN414679 from Australia                      | FJ603125                                                           | JN633080                                     |
| <i>Myrmecophaga tridactyla</i>    | KC113268                                     | AF392875                                     | FR871852                                                           | AY011750                                     |
| <i>Mystacina tuberculata</i>      | XXXXXX                                       | JN414730                                     | JN414791                                                           | AY835959                                     |
| <i>Myzopoda aurita</i>            | XXXXXX                                       | JN414731                                     | JN414792                                                           | AY835956                                     |
| <i>Nandinia binotata</i>          | GU931063                                     | AY928732                                     | AY170083                                                           | JN633097                                     |
| <i>Nannospalax ehrenbergi</i>     | JN632866                                     | AY294898                                     | JN414825                                                           | JN633127                                     |
| <i>Nannospalax galili</i>         | AXCS01060012                                 | AXCS01122144                                 | AXCS01076770                                                       | AXCS01356044                                 |
| <i>Nasalis larvatus</i>           | JMHX01319535                                 | JX856202                                     | JX856202                                                           | JMHX01319539                                 |
| <i>Natalus stramineus</i>         | JN632826                                     | JN414732                                     | JN414793                                                           | AY835961                                     |
| <i>Noctilio albiventris</i>       | XXXXXX                                       | XXXXXX                                       | XXXXXX                                                             | KC783094                                     |
| <i>Nomascus leucogenys</i>        | ADFV01034609                                 | Ensembl 65                                   | Trace                                                              | Ensembl 67                                   |
| <i>Notoryctes typhlops</i>        | JN632780                                     | JN414662                                     | AF025385                                                           | JN633064                                     |
| <i>Nycteris thebaica</i>          | JN632827                                     | JN414733                                     | XXXXXX                                                             | XXXXXX                                       |
| <i>Nycticebus coucang</i>         | JN632840                                     | JN414752                                     | AJ313467                                                           | JN633110                                     |
| <i>Nyctimene albiventer</i>       | JN632830                                     | JN414736                                     | JN414796                                                           | AY835941                                     |
| <i>Ochotona princeps</i>          | ALIT01010450                                 | Ensembl 65                                   | Ensembl 65                                                         | ALIT01088100                                 |
| <i>Octodon degus</i>              | AJSA01144947                                 | AJSA01172176                                 | AJSA01165769                                                       | AJSA01101586                                 |
| <i>Octodontomys gliroides</i>     | JN632862                                     | AF520649                                     | JN414823                                                           | JN633123                                     |
| <i>Odobenus rosmarus</i>          | GU931079                                     | DQ205815 and DQ240686                        | ANOP01060931                                                       | GU167490                                     |
| <i>Okapia johnstoni</i>           | JN632810                                     | JN414690                                     | JN414772                                                           | AY011798                                     |
| <i>Orcinus orca Norway</i>        | ANOL01060499                                 | ANOL01013713                                 | ANOL01076987                                                       | ANOL01044246                                 |
| <i>Orycteropus afer</i>           | JN632800                                     | ALYB01229296                                 | OAU48712                                                           | ALYB01309607                                 |
| <i>Oryctolagus cuniculus</i>      | EU142173                                     | NM_001082636                                 | Ensembl 65                                                         | Ensembl 67                                   |
| <i>Otolemur garnettii</i>         | AAQR03024534                                 | Ensembl 65                                   | Ensembl 65                                                         | HM759821                                     |
| <i>Ovis aries</i>                 | AMGL01103677                                 | DQ062717                                     | AMGL01071959                                                       | ACIV011210939                                |
| <i>Pan paniscus</i>               | HM761905                                     | AJFE01034128                                 | AJFE01027343                                                       | AJFE01032683                                 |

| Name                                 | FBN1          | GHR                                                            | IRBP         | PLCB4         |
|--------------------------------------|---------------|----------------------------------------------------------------|--------------|---------------|
| <i>Pan_troglodytes</i>               | HM761906      | Ensembl 65                                                     | XM_507774    | Ensembl 67    |
| <i>Panthera_tigris</i>               | ATCQ01053159  | ATCQ01133818                                                   | ATCQ01119403 | ATCQ01082781  |
| <i>Pantholops_hodgsonii</i>          | Scaffold 136  | Scaffold 66                                                    | AGTT01119462 | Scaffold 1136 |
| <i>Papio_anubis</i>                  | HM761876      | NM_001112616                                                   | AHZZ01022048 | AHZZ01010220  |
| <i>Papio_hamadryas</i>               | HM761877      | PreEnsembl 65                                                  | JX856204     | PreEnsembl 67 |
| <i>Pecari_tajacu</i>                 | JN632813      | JN414694                                                       | JN414774     | JN633089      |
| <i>Pedetes_capensis</i>              | EU142172      | AF332025                                                       | AY303220     | AY011765      |
| <i>Peromyscus_maniculatus</i>        | AYHN01122035  | EF989785                                                       | AYHN01033340 | AYHN01065874  |
| <i>Petaurus_breviceps</i>            | JN632788      | JN414670                                                       | AY243441     | JN633072      |
| <i>Petromus_typicus</i>              | JN632863      | JN414761                                                       | AJ427244     | JN633124      |
| <i>Phascolarctos_cinereus</i>        | JN632790      | JN414672                                                       | AY243434     | JN633074      |
| <i>Phoca_vitulina</i>                | JN632816      | JN414717                                                       | GU167805     | GU167474      |
| <i>Phocoena_phocoena</i>             | JN414653      | JN414704                                                       | AF231340     | JN414833      |
| <i>Physeter_macrocephalus</i>        | JN414655      | JN414706                                                       | PCU50818     | JN414835      |
| <i>Pithecia_pithecia</i>             | HM761960      | KM013986                                                       | AJ313475     | HM759746      |
| <i>Platanista_minor</i>              | JN414656      | JN414707                                                       | JN414781     | JN414836      |
| <i>Podogymnura_truei</i>             | XXXXXX        | JN414740                                                       | JN414802     | JN633106      |
| <i>Pongo_abelii</i>                  | Ensembl 66:   | Ensembl 65                                                     | XM_002820699 | Ensembl 67    |
| <i>Pontoporia_blainvillei</i>        | JN414657      | JN414708                                                       | AF304081     | JN414837      |
| <i>Prionodon_linsang</i>             | GU931048      | JN414709                                                       | JN414782     | JN633091      |
| <i>Procavia_capensis</i>             | Ensembl 66    | AF392896                                                       | Ensembl 65   | AY011757      |
| <i>Procyon_lotor</i>                 | GU931082      | JN414718                                                       | AB082981     | EF987932      |
| <i>Propithecus_coquereli</i>         | HM761972      | JN414750                                                       | JZKE01166551 | HM759879      |
|                                      |               | Propithecus_verreauxi<br>coquereli (P. verreauxi i<br>GenBank) |              |               |
| <i>Propithecus_verreauxi</i>         | HM761971      | HM761361                                                       | AJ313471     | HM759768      |
| <i>Pseudocheirops_cupreus</i>        | JN632793      | JN414675                                                       | AF025387     | JN633076      |
| <i>Pteronotus_parnellii</i>          | JN632825      | JN414729                                                       | JN414790     | AY835957      |
| <i>Pteropus_alecto</i>               | ALWS01090594  | ALWS01086770                                                   | ALWS01070978 | ALWS01097659  |
| <i>Pteropus_giganteus</i>            | JN632829      | JN414735                                                       | JN414795     | AY011790      |
| <i>Pteropus_vampyrus</i>             | Ensembl 66    | AF392893                                                       | Ensembl 65   | Ensembl 67    |
| <i>Ptilocercus_lowii</i>             | EU142182      | JN414744                                                       | JN414806     | EU142184      |
| <i>Rattus_norvegicus</i>             | Ensembl 66    | Ensembl 65                                                     | Ensembl 65   | Ensembl 66    |
| <i>Rhinolophus_craeghi</i>           | JN632831      | JN414737                                                       | JN414797     | AY835942      |
| <i>Rhinolophus_ferrumequinum</i>     | AWHA01124408  | AWHA01237173                                                   | AWHA01036742 | AWHA01164814  |
| <i>Rhinopithecus_roxellana</i>       | JABR01102817  | JABR01045814                                                   | JABR01081887 | JABR01097640  |
| <i>Rhinopoma_hardwickii</i>          | XXXXXX        | JN414738                                                       | JN414798     | AY835945      |
| <i>Rhogeessa_tumida</i>              | XXXXXX        | XXXXXX                                                         | XXXXXX       | AY835954      |
| <i>Rhynchocyon_petersi</i>           | JN632799      | JN414682                                                       | JN414765     | JN633082      |
| <i>Rhyncholestes_raphanurus</i>      | JN632782      | JN414664                                                       | AY243440     | JN633066      |
| <i>Saccopteryx_bilineata</i>         | JN632819      | KM190105                                                       | JN414787     | JN633104      |
| <i>Saimiri_boliviensis</i>           | PreEnsembl 66 | AF339061                                                       | AGCE01062899 | PreEnsembl 67 |
| <i>Sarcophilus_harrisii</i>          | AFEY01452333  | Ensembl 65                                                     | AEFK01003355 | Ensembl 67    |
| <i>Solenodon_paradoxus</i>           | XXXXXX        | JN414741                                                       | XXXXXX       | AY530074      |
| <i>Sorex_araneus</i>                 | JN632834      | Ensembl 65                                                     | Ensembl 65   | AALT02098351  |
| <i>Spermophilus_tridecemlineatus</i> | AGTP01002562  | Ensembl 65                                                     | Ensembl 65   | Ensembl 67    |
| <i>Suricata_suricatta</i>            | GU931052      | JN414712                                                       | AY170084     | JN633093      |
| <i>Sus_scrofa</i>                    | Ensembl 66    | JN414693                                                       | Ensembl 65   | Ensembl 67    |
| <i>Tadarida_brasiliensis</i>         | JN632824      | JN414728                                                       | AY243442     | AY059707      |
| <i>Talpa_altaica</i>                 | XXXXXX        | JN414742                                                       | XXXXXX       | AY011752      |
| <i>Tamias_striatus</i>               | EU142170      | JN414762                                                       | AY227588     | AY011762      |
| <i>Tapirus_indicus</i>               | JN632836      | EU448990                                                       | JN414805     | AY011801      |
| <i>Tarsipes_rostratus</i>            | JN632794      | JN414676                                                       | FJ603128     | JN633077      |
| <i>Tarsius_bancanus</i>              | HM761961      | XXXXXX                                                         | AF271423     | HM759866      |
| <i>Tarsius_syrichta</i>              | Ensembl 66    | JN414753                                                       | Z11806       | Ensembl 67    |
| <i>Thryonomys_swinderianus</i>       | JN632864      | AF332035                                                       | AJ427243     | JN633125      |
| <i>Tragulus_napu</i>                 | JN632814      | JN414695                                                       | JN414775     | JN633090      |
| <i>Trichechus_manatus</i>            | AHIN01117896  | AHIN01132166                                                   | AHIN01129411 | AHIN01094092  |
| <i>Trichosurus_vulpecula</i>         | JN632789      | JN414671                                                       | JN414764     | JN633073      |
| <i>Tupaia_belangeri</i>              | AAPY01242497  | AF332018                                                       | Ensembl 65   | ALAR01066827  |
| <i>Tupaia_minor</i>                  | EU142181      | XXXXXX                                                         | JN414807     | HM759839      |
| <i>Turstopus_truncatus</i>           | ABRN02156579  | JN414697                                                       | Ensembl 65   | ABRN02244949  |
| <i>Urogale_everetti</i>              | EU213054      | XXXXXX                                                         | XXXXXX       | FJ554952 gene |
| <i>Ursus_americanus</i>              | genome        | AF392879                                                       | AY303837     | genome        |
| <i>Ursus_arctos</i>                  | genome        | genome                                                         | AY303842     | genome        |

| Name                               | FBN1        | GHR          | IRBP         | PLCB4       |
|------------------------------------|-------------|--------------|--------------|-------------|
| <i>Ursus maritimus</i>             | Scaffold 47 | Scaffold 4   | AY303843     | Scaffold 53 |
| <i>Vicugna pacos</i>               | Ensembl 66  | Ensembl 65   | ABRR02133816 | Ensembl 67  |
| <i>Vombatus ursinus</i>            | JN632795    | JN414677     | AF025386     | JN633078    |
| <i>Allenopithecus nigroviridis</i> | HM761835    | JX856181     | JX856181     | HM759757    |
| <i>Alouatta sara</i>               | HM761924    | JX856182     | JX856182     | HM759754    |
| <i>Anolis carolinensis</i>         | XXXXXX      | XXXXXX       | XXXXXX       | XXXXXX      |
| <i>Cacajao calvus</i>              | HM761935    | JX856184     | JX856184     | HM759811    |
| <i>Callimico goeldii</i>           | HM761912    | JX856186     | JX856186     | HM759835    |
| <i>Cercocebus chrysogaster</i>     | HM761836    | JX856187     | JX856187     | HM759852    |
| <i>Cercopithecus albogularis</i>   | HM761838    | JX856188     | JX856188     | HM759722    |
| <i>Cercopithecus diana</i>         | HM761841    | HM761408     | XXXXXX       | HM759857    |
| <i>Cynopterus brachyotis</i>       | XXXXXX      | XXXXXX       | XXXXXX       | AY835940    |
| <i>Erinaceus concolor</i>          | JN632833    | KF783102     | XXXXXX       | AY011751    |
| <i>Erythrocebus patas</i>          | HM761855    | JX856190     | JX856190     | HM759841    |
| <i>Eulemur mongoz</i>              | HM761977    | HM761366     | AF081064     | HM759818    |
| <i>Galago senegalensis</i>         | HM761990    | JX856194     | JX856194     | HM759724    |
| <i>Gallus gallus</i>               | XXXXXX      | XXXXXX       | XXXXXX       | XXXXXX      |
| <i>Graphiurus murinus</i>          | JN632861    | AF332031     | AY303219     | JN633122    |
| <i>Haplemur griseus</i>            | HM761979    | JX856196     | JX856196     | HM759800    |
| <i>Hylobates agilis</i>            | HM761897    | HM761449     | XXXXXX       | HM759864    |
| <i>Hylobates muelleri</i>          | XXXXXX      | HM761451     | XXXXXX       | HM759874    |
| <i>Lagothrix lagotricha</i>        | HM761911    | JX856197     | JX856197     | HM759753    |
| <i>Leontopithecus rosalia</i>      | HM761919    | JX856198     | JX856198     | HM759865    |
| <i>Macaca fuscata</i>              | HM761861    | HM761422     | AY434085     | HM759850    |
| <i>Miopithecus ogouensis</i>       | HM761874    | JX856201     | JX856201     | HM759733    |
| <i>Moschus moschiferus</i>         | JN632812    | XXXXXX       | XXXXXX       | XXXXXX      |
| <i>Neovison vison</i>              | GU931073    | AF498195     | AB082977     | EF472399    |
| <i>Nomascus concolor</i>           | HM761900    | JX856203     | JX856203     | HM759804    |
| <i>Ochotona hyperborea</i>         | EU142174    | XXXXXX       | XXXXXX       | AY011779    |
| <i>Ornithorhynchus anatinus</i>    | XXXXXX      | AAPN01086960 | XM_003428351 | XXXXXX      |
| <i>Panthera onca</i>               | GU931047    | DQ082104     | HM107670     | AY011804    |
| <i>Pongo pygmaeus</i>              | HM761908    | JX856215     | JX856215     | HM759759    |
| <i>Propithecus diadema</i>         | HM761968    | HM761358     | EU342279     | HM759815    |
| <i>Pygathrix nemaesus</i>          | HM761883    | JX856207     | JX856207     | HM759727    |
| <i>Rousettus lanosus</i>           | XXXXXX      | XXXXXX       | XXXXXX       | AY011791    |
| <i>Saguinus fuscicollis</i>        | XXXXXX      | JX856208     | JX856208     | HM759807    |
| <i>Saimiri oerstedii</i>           | HM761954    | JX856209     | JX856209     | HM759718    |
| <i>Saimiri sciureus</i>            | HM761955    | AF540642     | AF271424     | HM759794    |
| <i>Semnopithecus entellus</i>      | HM761887    | XXXXXX       | JX856210     | HM759720    |
| <i>Sylvilagus floridanus</i>       | XXXXXX      | AF332017     | JF938890     | JN633105    |
| <i>Symphalangus syndactylus</i>    | HM761903    | JX856211     | JX856211     | HM759875    |
| <i>Tachyglossus aculeatus</i>      | XXXXXX      | JN414658     | XXXXXX       | XXXXXX      |
| <i>Taeniopygia guttata</i>         | XXXXXX      | XXXXXX       | XXXXXX       | XXXXXX      |
| <i>Thyroptera tricolor</i>         | JN632832    | XXXXXX       | JN414799     | AY835958    |
| <i>Trachypithecus francoisi</i>    | HM761891    | JX856213     | JX856213     | HM759732    |
| <i>Tupaia glis</i>                 | HM761997    | XXXXXX       | Z11808       | HM759747    |
| <i>Tamandua tetradactyla</i>       | XXXXXX      | AF332011     | FR871853     | AY011749    |
| <i>Xenopus tropicalis</i>          | XXXXXX      | XXXXXX       | XXXXXX       | XXXXXX      |

| Name                          | PNOG         | Rag1                                                  | Rag2         |
|-------------------------------|--------------|-------------------------------------------------------|--------------|
| <i>Abrocoma bennettii</i>     | XXXXXX       | JN414949 (5' end) and JN633625 (3' end)               | JN633325     |
| <i>Acinonyx jubatus</i>       | LLWD01000751 | LLWD01000457                                          | LLWD01000457 |
| <i>Acrobates pygmaeus</i>     | JN633771     | JN414873 (5' end) JN633576 (middle) AY125029 (3' end) | JN633287     |
| <i>Aepyprymnus rufescens</i>  | JN633776     | JN414878 JN633580 (middle) EU160451 (3' end)          | JN633292     |
| <i>Ailuropoda melanoleuca</i> | Ensembl 70   | Ensembl 65                                            | Ensembl 65   |
| <i>Ailurus fulgens</i>        | GU931199     | JN414904 (5' end) AB188525 (3' end)                   | GU931272     |
| <i>Amblysomus hottentotus</i> | AY059709     | AY249882 (5' end) JN633587 (3' end)                   | AY059712     |
| <i>Anomalurus beecroftii</i>  | JN633798     | JN414951 (5' end) JN633626 (3' end)                   | JN633326     |
| <i>Anoura geoffroyi</i>       | AY834591     | AY834656                                              | AF316431     |
| <i>Antilocapra americana</i>  | JN633787     | EU189402 (5' end) JN414861 (3' end)                   | JN633306     |



| Name                                | PNOC                               | Rag1                                                  | Rag2          |
|-------------------------------------|------------------------------------|-------------------------------------------------------|---------------|
| <i>Antrozous pallidus</i>           | AY834593                           | AF447507                                              | GU328047      |
| <i>Aotus nancymae</i>               | HM759646                           | JYKP01046777                                          | JYKP01046778  |
| <i>Aplodontia rufa</i>              | JN633799                           | AY241468 (5' end) JN633627 (3' end)                   | AY303198      |
| <i>Apodemus sylvaticus</i>          | LIPJ01006002 deleted strings of Ns | LIPJ01021423 deleted strings of Ns                    | LIPJ01021423  |
| <i>Arctocephalus forsteri</i>       | GU931194                           | JN414912 (5' end) GU167545 (3' end)                   | GU931267      |
| <i>Artibeus jamaicensis</i>         | AY011846                           | JN414928 (5' end) AY834655 (3' end)                   | GU328048      |
| <i>Ateles fusciceps</i>             | HM759650                           | JN414940 (5' end) AY065915 (3' end)                   | AY011958      |
| <i>Balaena mysticetus</i>           | scaffold 217                       | scaffold 714                                          | scaffold 714  |
| <i>Balaenoptera acutorostrata</i>   | ATDI01119574                       | ATDI01028909                                          | ATDI01028909  |
| <i>Balaenoptera bonaerensis</i>     | BAUQ01050306                       | BAUQ01605918                                          | BAUQ01027122  |
| <i>Bison bison</i>                  | JPYT01772756                       | JPYT01279625                                          | JPYT01109101  |
| <i>Bos grunniens</i>                | AGSK01109838                       | AGSK01035660                                          | AGSK01035661  |
| <i>Bos indicus</i>                  | AGFL01073514                       | AGFL01132861                                          | AGFL01132863  |
| <i>Bos taurus</i>                   | Ensembl 66                         | Ensembl 65                                            | Ensembl 65    |
| <i>Bradypus tridactylus</i>         | JN633785                           | JN414891 (5' end) JN633592 (3' end)                   | JN633304      |
| <i>Bubalus bubalis</i>              | AWWX01570869                       | AWWX01581293                                          | AWWX01594338  |
| <i>Caenolestes fuliginosus</i>      | JN633766                           | JN633572 (5' end) AF303967 (3' end)                   | JN633282      |
| <i>Callithrix jacchus</i>           | HM759631                           | Ensembl 66                                            | ACFV01039741  |
| <i>Caluromys philander</i>          | JN633762                           | DQ865884 gene                                         | XXXXXX        |
| <i>Camelus bactrianus</i>           | JARL01033037                       | JARL01029584                                          | JARL01029584  |
| <i>Camelus dromedarius</i>          | JDVD01005872                       | JDVD01007009                                          | JDVD01007009  |
| <i>Camelus ferus</i>                | AGVR01022510                       | AGVR01060669                                          | AGVR01060668  |
| <i>Canis familiaris</i>             | Ensembl 69                         | Ensembl 66                                            | Ensembl 65    |
| <i>Caperea marginata</i>            | JN414838                           | EU445023 (5' end) JN414850 gene (3' end)              | JN414980      |
| <i>Capra aegagrus</i>               | CBYH010013869                      | CBYH010004021                                         | CBYH010004021 |
| <i>Capra hircus</i>                 | AJPT01085885                       | AJPT01152538                                          | AJPT01152539  |
| <i>Capreolus capreolus</i>          | CCMK010205611                      | CCMK010053590                                         | CCMK010053590 |
| <i>Capromys pilorides</i>           | JN633800                           | JN414954 (5' end) KM013988 (3' end)                   | FM162107      |
| <i>Castor canadensis</i>            | AY011822                           | JN414956 (5' end) AY011880 (3' end)                   | AY303199      |
| <i>Cavia aperea</i>                 | AVPZ01000112                       | AVPZ01000922                                          | AVPZ01000922  |
| <i>Cavia porcellus</i>              | Ensembl 66                         | Ensembl 66                                            | Ensembl 65    |
| <i>Cebus albifrons</i>              | HM759656                           | JN414942 (5' end) HM759115 (3' end)                   | HM758944      |
| <i>Ceratotherium simum</i>          | AKZM01031561                       | AKZM01038803                                          | AKZM01038803  |
| <i>Cercartetus nanus</i>            | JN633772                           | JN414874 (5' end) EU160452 (3' end)                   | JN633288      |
| <i>Cercocebus atys</i>              | JZLG01057570                       | JZLG01075869                                          | JZLG01075869  |
| <i>Cervus taiouanus</i>             | JN633788                           | JN414893 (5' end) JN633594 gene (3' end)              | JN633307      |
| <i>Cheirogaleus medius</i>          | HM759682                           | HM759144                                              | HM758975      |
| <i>Chinchilla lanigera</i>          | AGCD01002969                       | AGCD01022724                                          | AGCD01022723  |
| <i>Chlorocebus sabaeus</i>          | AQIB01116738                       | AQIB01084151                                          | AQIB01084142  |
| <i>Choloepus didactylus</i>         | AY011809                           | AY011866                                              | AY011921      |
| <i>Choloepus hoffmanni</i>          | ABVD01149221                       | ABVD01015893                                          | Ensembl 65    |
| <i>Chrysochloris asiatica</i>       | AMDV01136016                       | AMDV01148163                                          | AMDV01148164  |
| <i>Colobus angolensis</i>           | HM759566                           | JYKR01055426                                          | JYKR01055427  |
| <i>Condylura cristata</i>           | XXXXXX                             | AJFV01041595                                          | AJFV01041595  |
| <i>Craseonycteris thonglongyai</i>  | AY834603                           | JN414918 (5' end) AY834660 (3' end)                   | KP176002      |
| <i>Cratogeomys castanops</i>        | XXXXXX                             | JN633633 gene                                         | XXXXXX        |
| <i>Cricetulus griseus</i>           | AFTD01156872                       | PreEnsembl 66                                         | PreEnsembl 65 |
| <i>Crocota crocata</i>              | DQ082324                           | AY928752 (5' end) JN414907 (3' end)                   | DQ082369      |
| <i>Ctenodactylus gundi</i>          | JN633801                           | JN633629 gene                                         | FM162097      |
| <i>Ctenomys boliviensis</i>         | XXXXXX                             | JN414961 (5' end) JN633630 (3' end)                   | XXXXXX        |
| <i>Cuniculus taczanowskii</i>       | JN633797                           | JN414950 (5' end) AY011894 (3' end)                   | AY011951      |
| <i>Cyclopes didactylus</i>          | JN633786                           | AY239196 (5' end) AY249875 (5' end) EU142186 (3' end) | JN633305      |
| <i>Cynocephalus volans</i>          | HM759547                           | XXXXXX                                                | HM758834      |
| <i>Cynopterus sphinx</i>            | GAOV01077185                       | AF203758                                              | EU617897      |
| <i>Dasyprocta punctata</i>          | XXXXXX                             | JN414962 gene                                         | JN633331      |
| <i>Dasyapus novemcinctus</i>        | AAGV03295349                       | AAGV03297556                                          | AAGV03297554  |
| <i>Dasyurus albopunctatus</i>       | XXXXXX                             | JN414883 (5' end) JN633585 (middle) AY243398 (3' end) | JN633297      |
| <i>Daubentonia madagascariensis</i> | HM759681                           | JN414944 (5' end) HM759143 (3' end)                   | AGTM011788588 |
| <i>Delphinapterus leucas</i>        | JN414843                           | JN414899 (5' end) JN414855 (3' end)                   | JN414985      |
| <i>Desmodus rotundus</i>            | AY834590                           | AF447517 gene                                         | AF316444      |
| <i>Didelphis virginiana</i>         | JN633761                           | DQ865890 (3' end) AF303969 (5' end)                   | XXXXXX        |

| Name                             | PNOC          | Rag1                                                          | Rag2                                                              |
|----------------------------------|---------------|---------------------------------------------------------------|-------------------------------------------------------------------|
|                                  |               | overlapping region excluded)                                  |                                                                   |
| <i>Dinomys branickii</i>         | AY011834      | JN414963 (5' end) AY011893 (3' end)                           | FM162104                                                          |
| <i>Dipodomys heermanni</i>       | AY011829      | JN414968 (5' end) AY011888 (3' end)                           | AY011945                                                          |
| <i>Dipodomys ordii</i>           | Ensembl 66    | ABRO02033394                                                  | ABRO02033394                                                      |
| <i>Dromiciops gliroides</i>      | JN633764      | JN414866 (5' end) JN633570 (middle)<br>AF303970 (3' end)      | JN633280                                                          |
| <i>Dugong dugon</i>              | JN633784      | AY239193 JN633590 gene (3' end)                               | JN633302                                                          |
| <i>Echinops telfairi</i>         | KC113263      | AAIY02164265                                                  | Ensembl 65                                                        |
| <i>Echymipera kalubu</i>         | JN633770      | JN414872 (3' end) JN633575 gene<br>(middle) AY243386 (5' end) | JN633286                                                          |
| <i>Eidolon helvum</i>            | AWHC01062362  | AWHC01086874                                                  | AWHC01086875 (5') and<br>AWHC01086874 (3')                        |
| <i>Elephantulus edwardii</i>     | AMGZ01076662  | AMGZ01062569                                                  | AMGZ01062570                                                      |
| <i>Elephantulus rufescens</i>    | AY011819      | JN414888 (5' end) AY011877 gene (3'<br>end)                   | AY011934                                                          |
| <i>Elephas maximus</i>           | XXXXXX        | EF551560 (5' end) and AY125021 (3'<br>end)                    | JN633303                                                          |
| <i>Emballonura atrata</i>        | AY834586      | AF447519                                                      | AF447536                                                          |
| <i>Eptesicus fuscus</i>          | ALEH01089586  | ALEH01070252                                                  | ALEH01070252                                                      |
| <i>Equus asinus</i>              | JREZ01000021  | JREZ01000302                                                  | JREZ01000302                                                      |
| <i>Equus caballus</i>            | AAWR02032145  | Ensembl 66                                                    | Ensembl 65                                                        |
| <i>Equus przewalskii</i>         | ATBW01064770  | ATBW01046869                                                  | ATBW01046869                                                      |
| <i>Erethizon dorsatum</i>        | AY011828      | JN414966 (5' end) AY011887 (3' end)                           | AY303205                                                          |
| <i>Erinaceus europaeus</i>       | Ensembl 66    | Ensembl 66                                                    | AMDU01076615                                                      |
| <i>Eschrichtius robustus</i>     | JN414840      | EU445022 (5' end) JN414852 (3' end)                           | JN414982                                                          |
| <i>Eubalaena australis</i>       | JN414839      | JN414897 (5' end) JN414851 (3' end)                           | JN414981                                                          |
| <i>Eulemur flavifrons</i>        | HM759694      | LGHW01001998                                                  | LGHW01001998                                                      |
| <i>Eulemur macaco</i>            | HM759693      | LGHX01001981                                                  | LGHX01001981                                                      |
| <i>Eumops auripendulus</i>       | AY834602      | AY834659 gene                                                 | HQ671585                                                          |
| <i>Euphractus sexcinctus</i>     | XXXXXX        | AY011867 gene                                                 | AY011922                                                          |
| <i>Felis catus</i>               | ACBE01125856  | Ensembl 66                                                    | XM_004001424 with corrections at<br>219-225 based on ti 717069889 |
| <i>Fossa fossana</i>             | GU931177      | JN633599 (5' end) JN414905 (3' end)                           | GU931251                                                          |
| <i>Fukomys damarensis</i>        | AYUG01071401  | AYUG01154367                                                  | AYUG01154365                                                      |
| <i>Furipterus horrens</i>        | AY834600      | JN414920 (5' end) AY834658 (3' end)                           | AY141016                                                          |
| <i>Galeopterus variegatus</i>    | HM759546      | JN414934 (5' end) AF203762 (3' end)                           | AF203772 RAG 2 (RAG 2) gene                                       |
| <i>Genetta genetta</i>           | DQ082328 PNOC | JN633609 (5' end) JN414915 (3' end)                           | DQ082373                                                          |
| <i>Glirionia venusta</i>         | JN633763      | DQ865891 g                                                    | XXXXXX                                                            |
| <i>Gorilla gorilla</i>           | HM759617      | CABD02060547                                                  | CABD02060547                                                      |
| <i>Heterocephalus glaber</i>     | AHKG01038837  | AHKG01047384                                                  | AHKG01047384 c                                                    |
| <i>Heterohyrax brucei</i>        | JN633783      | JN414890 gene                                                 | JN633301                                                          |
| <i>Hippopotamus amphibius</i>    | AY011851      | JN414894 (5' end) AY011909 (3' end)                           | AY011969                                                          |
| <i>Hipposideros commersoni</i>   | AY834583      | JN414921 (5' end) AF203760 (3' end)                           | AF203770                                                          |
| <i>Homo sapiens</i>              | Ensembl 66    | Ensembl 66                                                    | NG_007573 r                                                       |
| <i>Hoplomys gymnurus</i>         | XXXXXX        | JN414965 (5' end) JN633632 (3' end)                           | JN633332                                                          |
| <i>Hydrochoeris hydrochaeris</i> | AY011832      | JN414969 (5' end) AY011891 gene (3'<br>end)                   | AY011948 (5 prime end until overlap<br>starts) + FM162109         |
| <i>Hydrodamalis gigas</i>        | consensus     | Consensus                                                     | consensus                                                         |
| <i>Hylobates lar</i>             | HM759610      | HM759071                                                      | HM758898                                                          |
| <i>Hypsiprymnodon moschatus</i>  | JN633777      | JN414879 (5' end) JN633581 gene<br>(middle) AY125044 (3' end) | JN633293                                                          |
| <i>Hystrix brachyura</i>         | AY011827      | JN414970 (5' end) AY011886 (3' end)                           | AY011943                                                          |
| <i>Inia geoffrensis</i>          | JN414842      | EU189406 (5' end) JN414854 (3' end)                           | JN414984                                                          |
| <i>Isoodon macrourus</i>         | JN633768      | JN414870 (5' end) JN633574<br>(middle)                        | JN633284                                                          |
| <i>Jaculus jaculus</i>           | JN633802      | AKZC01031223                                                  | AKZC01182975                                                      |
| <i>Kogia breviceps</i>           | JN414845      | JN414901 (5' end) JN414857 (3' end)                           | JN414987                                                          |
| <i>Lama glama</i>                | AY011852      | AF305953 gene                                                 | AF305954                                                          |
| <i>Laonastes aenigmamus</i>      | JN633804      | JN414977 gene                                                 | JN633338                                                          |
| <i>Lemur catta</i>               | HM759699      | JN414947 (5' end) HM759158 (3'<br>end)                        | HM758993                                                          |
| <i>Leptonychotes weddellii</i>   | APMU01068065  | APMU01076581                                                  | APMU01076582                                                      |
| <i>Lipotes vexillifer</i>        | AUPI01120855  | AUPI01125323                                                  | AUPI01125324                                                      |
| <i>Loxodonta africana</i>        | AAGU03044737  | Ensembl 66                                                    | Ensembl 65                                                        |
| <i>Macaca fascicularis</i>       | HM759574      | AEHL01146141 c                                                | CAEC01126428                                                      |
| <i>Macaca mulatta</i>            | HM759577      | Ensembl 66                                                    | Ensembl 65                                                        |

| Name                              | PNOc                                   | Rag1                                                             | Rag2                                   |
|-----------------------------------|----------------------------------------|------------------------------------------------------------------|----------------------------------------|
| <i>Macaca nemestrina</i>          | HM759578                               | JZLF01064069                                                     | JZLF01064069                           |
| <i>Macroderma gigas</i>           | AY834584                               | AY834654 gene                                                    | AY834661                               |
| <i>Macropus eugenii</i>           | Ensembl 66                             | Ensembl 66                                                       | Ensembl 65                             |
| <i>Macroscelides proboscideus</i> | AY011818                               | AY249884 (5' end) AY011876 (3' end)                              | AY011933                               |
| <i>Macrotis lagotis</i>           | JN633769                               | JN414871 (5' end) AY125024 (3' end)                              | JN633285                               |
| <i>Mandrillus leucophaeus</i>     | HM759586                               | JYKQ01038930                                                     | JYKQ01038930                           |
| <i>Manis pentadactyla</i>         | AY011863                               | JN414916 (5' end) AY011919 (3' end)                              | short read archive (958 reads)         |
| <i>Manis tricuspis</i>            | JN633792                               | JN414917 (5' end) JN633610 (3' end)                              | XXXXX                                  |
| <i>Marmota marmota</i>            | CEEU01000062                           | CEEU01000004                                                     | CEEU01000004                           |
| <i>Megaderma lyra</i>             | AY059711                               | JN414922 (5' end) AF203757 (3' end)                              | AWHB01434943                           |
| <i>Megaptera novaeangliae</i>     | AY011849                               | EU445015 (5' end) AY011908 (3' end)                              | XXXXX                                  |
| <i>Meles meles</i>                | EF987967                               | JN414909 (5' end) GU167548 (3' end)                              | EF988010                               |
| <i>Mephitis mephitis</i>          | GU931183                               | JN414908 (5' end) AB109358 (3' end)                              | GU931255                               |
| <i>Mesocricetus auratus</i>       | APMT01094347                           | APMT01008006                                                     | APMT01008008                           |
| <i>Mesoplodon bidens</i>          | JN414841                               | JN414898 (5' end) JN414853 (3' end)                              | JN414983                               |
| <i>Microcebus murinus</i>         | Ensembl 66                             | Ensembl 65                                                       | ABDC01016726                           |
| <i>Microtus agrestis_Northern</i> | WGS specimen from England LIQJ01000077 | WGS specimen from England LIQJ01002765                           | WGS specimen from England LIQJ01002765 |
| <i>Microtus ochrogaster</i>       | AHZW01131130                           | AHZW01089951                                                     | AHZW01089950                           |
| <i>Monodelphis domestica</i>      | Ensembl 66                             | Ensembl 66                                                       | Ensembl 65                             |
| <i>Mus musculus</i>               | Ensembl 66                             | Ensembl 66                                                       | NM_009020 r                            |
| <i>Mustela putorius</i>           | PreEnsembl 66                          | PreEnsembl 66                                                    | PreEnsembl 65                          |
| <i>Myocastor coypus</i>           | AY011833                               | JN414955 (5' end) AY011892 (3' end)                              | AY011949                               |
| <i>Myodes glareolus</i>           | LIP101000928                           | LIP101000471                                                     | LIP101000471                           |
| <i>Myotis brandtii</i>            | ANKR01256740                           | ANKR01242610                                                     | ANKR01242611                           |
| <i>Myotis daubentonii</i>         | AY834595                               | AF203754                                                         | AM265653                               |
| <i>Myotis davidii</i>             | ALWT01208309                           | ALWT01038399                                                     | ALWT01038399                           |
| <i>Myotis lucifugus</i>           | Ensembl 66                             | Ensembl 66                                                       | AAPE02039491                           |
| <i>Myrmecobius fasciatus</i>      | JN633780                               | JN414884 (5' end) JN633586 (middle) AY125045 (3' end)            | JN633298                               |
| <i>Myrmecophaga tridactyla</i>    | AY011811                               | JN414892 (5' end) AY011870 (3' end)                              | KF543813                               |
| <i>Mystacina tuberculata</i>      | AY834599                               | JN414925 (5' end) AY245419 (3' end)                              | AY141021                               |
| <i>Myzopoda aurita</i>            | AY834596                               | JN414926 gene                                                    | AY141022                               |
| <i>Nandinia binotata</i>          | GU931180                               | AY928756 (5' end) JN414910 (3' end)                              | GU931254                               |
| <i>Nannospalax ehrenbergi</i>     | JN633805                               | JN414978 (5' end) AB303250 (3' end)                              |                                        |
| <i>Nannospalax galili</i>         | AXCS01035275                           | AXCS01186739                                                     | AXCS01186740                           |
| <i>Nasalis larvatus</i>           | JMHX01319536                           | JMHX01189851                                                     | JMHX01319543                           |
| <i>Natalus stramineus</i>         | AY834601                               | AF447510 gene                                                    | AY141024                               |
| <i>Noctilio albiventris</i>       | AY834592                               | JN414927 (5' end) AF447509 gene (3' end)                         | AF330810 TK86633                       |
| <i>Nomascus leucogenys</i>        | HM759611                               | Ensembl 66                                                       | Ensembl 65                             |
| <i>Notoryctes typhlops</i>        | JN633765                               | EF551555 (5' end) AY125040 (3' end overlapping portion not used) | JN633281                               |
| <i>Nycteris thebaica</i>          | XXXXXX                                 | AY011907 gene                                                    | AF447530                               |
| <i>Nycticebus coucang</i>         | HM759713                               | JN414948 (5' end) HM759169 (3' end)                              | HM759006                               |
| <i>Nyctimene albiventer</i>       | AY834581                               | JN414930 (5' end) AF447514 (3' end)                              | AF447531                               |
| <i>Ochotona princeps</i>          | Ensembl 66                             | Ensembl 66                                                       | Ensembl 65                             |
| <i>Octodon degus</i>              | AJSA01073112                           | AJSA01043913                                                     | AJSA01043912                           |
| <i>Octodontomys gliroides</i>     | XXXXXX                                 | JN414972 (5' end) JN633635 (3' end)                              | JN633335                               |
| <i>Odobenus rosmarus</i>          | ANOP01043122                           | ANOP01036592                                                     | ANOP01036591                           |
| <i>Okapia johnstoni</i>           | AY011854                               | AY239178 (5' end) AY011911 (3' end)                              | AY011973                               |
| <i>Orcinus orca_Norway</i>        | ANOL01026860                           | ANOL02007033                                                     | ANOL02007033                           |
| <i>Orycteropus afer</i>           | ALYB01083030                           | ALYB01129019                                                     | ALYB01129018                           |
| <i>Oryctolagus cuniculus</i>      | AAGW02011023                           | Ensembl 66                                                       | M99311 (clone 1)                       |
| <i>Otolemur garnettii</i>         | AAQR03106211                           | Ensembl 66                                                       | Ensembl 65                             |
| <i>Ovis aries</i>                 | HQ287724                               | AMGL01032945                                                     | AMGL01032945                           |
| <i>Pan paniscus</i>               | HM759618                               | AJFE01106875 cntg107108                                          | XM_003830356                           |
| <i>Pan troglodytes</i>            | HM759619                               | Ensembl 66                                                       | Ensembl 65                             |
| <i>Panthera tigris</i>            | ATCQ01143202                           | ATCQ01054359                                                     | ATCQ01054359                           |
| <i>Pantholops hodgsonii</i>       | Scaffold 211                           | AGTT01013381                                                     | Scaffold 8                             |
| <i>Papio anubis</i>               | HM759590                               | AHZZ01067728                                                     | XM_003910020                           |
| <i>Papio hamadryas</i>            | HM759591                               | PreEnsembl 66                                                    | PreEnsembl 65                          |
| <i>Pecari tajacu</i>              | JN633790                               | JN414896 (5' end) JN633596 gene (3' end)                         | JN633308                               |

| Name                                 | PNOc          | Rag1                                                               | Rag2                       |
|--------------------------------------|---------------|--------------------------------------------------------------------|----------------------------|
| <i>Pedetes capensis</i>              | AY011824      | JN414973 (5' end) AY011882 gene (3' end)                           | AY303208                   |
| <i>Peromyscus maniculatus</i>        | AYHN01092946  | AYHN01065458                                                       | AYHN01065460               |
| <i>Petaurus breviceps</i>            | JN633773      | JN414875 (5' end) JN633577 gene (middle) AY125026 (3' end)         | JN633289                   |
| <i>Petromus typicus</i>              | JN633803      | JN414974 (5' end) JN633636 gene (3' end)                           | FM162099 activating gene 2 |
| <i>Phascolarctos cinereus</i>        | JN633775      | JN414877 (3' end) JN633579 gene (middle) AF303973 (3' end)         | JN633291                   |
| <i>Phoca vitulina</i>                | GU931196      | AY239187 (5' end) GU167527 (3' end)                                | GU931269                   |
| <i>Phocoena phocoena</i>             | JN414844      | JN414900 (5' end) JN414856 gene (3' end)                           | EF093057                   |
| <i>Physeter macrocephalus</i>        | JN414846      | EU445013 (5' end) JN414858 gene (3' end)                           | AWZP01020454               |
| <i>Pithecia pithecia</i>             | HM759678      | HM759140                                                           | HM758971                   |
| <i>Platanista minor</i>              | JN414847      | JN414902 (5' end) JN414859 gene (3' end)                           | JN414989                   |
| <i>Podogymnura truei</i>             | XXXXXX        | JN414935 (5' end) JN633620 gene (3' end)                           | JN633319                   |
| <i>Pongo abelii</i>                  | Ensembl 66    | Ensembl 66                                                         | Ensembl 65                 |
| <i>Pontoporia blainvillei</i>        | JN414848      | EU189407 (5' end) JN414860 gene (3' end)                           | JN414990                   |
| <i>Prionodon linsang</i>             | DQ082323 PNOc | JN633598 (5' end) JN414903 gene (3' end)                           | DQ082368                   |
| <i>Procavia capensis</i>             | ABRQ01115666  | Ensembl 66                                                         | JX869932                   |
| <i>Procyon lotor</i>                 | GU931203      | JN414913 (3' end) AB109359 (5' end)                                | DQ660279                   |
| <i>Propithecus coquereli</i>         | HM759689      | JZKE01145601                                                       | JZKE01145597               |
| <i>Propithecus verreauxi</i>         | HM759688      | HM759151                                                           | HM758983                   |
| <i>Pseudochirops cupreus</i>         | KC113265      | JN414880 (5' end) JN633582 gene (middle) AY243392 (3' end)         | JN633294                   |
| <i>Pteronotus parnellii</i>          | AY834597      | AWGZ01182669                                                       | AF330817 TK17953           |
| <i>Pteropus alecto</i>               | ALWS01011831  | ALWS01022109                                                       | ALWS01022110               |
| <i>Pteropus giganteus</i>            | AY011847      | JN414929 (5' end) EU617964 (RAG1) gene (3' end)                    | EU617913                   |
| <i>Pteropus vampyrus</i>             | Ensembl 66    | Ensembl 66                                                         | JN398310                   |
| <i>Ptilocercus lowii</i>             | EU142185      | JN414939 (5' end) EU142188 (3' end)                                | EU142190                   |
| <i>Rattus norvegicus</i>             | AY011826      | Ensembl 66                                                         | NM_001100528 r             |
| <i>Rhinolophus creaghi</i>           | AY834582      | JN414931 (5' end) AF447511 gene (3' end)                           | AF447528                   |
| <i>Rhinolophus ferrumequinum</i>     | AWHA01076679  | AWHA01098486                                                       | AWHA01073493               |
| <i>Rhinopithecus roxellana</i>       | JABR01048201  | JABR01103957                                                       | JABR01103957               |
| <i>Rhinopoma hardwickii</i>          | AY834585      | JN414932 (5' end) JN633619 gene (3' end)                           | AY141026                   |
| <i>Rhogeessa tumida</i>              | AY834594      | AF447508 gene                                                      | GU328109                   |
| <i>Rhynchocyon petersi</i>           | JN633782      | JN414889 (5' end) JN633589 gene (3' end)                           | JN633300                   |
| <i>Rhyncholestes raphanurus</i>      | JN633767      | JN414869 (5' end) JN633573 gene (middle portion) AY243399 (3' end) | JN633283                   |
| <i>Saccopteryx bilineata</i>         | XXXXXX        | JN414919 (5' end) JN633611 gene (3' end)                           | AY141015                   |
| <i>Saimiri boliviensis</i>           | PreEnsembl 66 | PreEnsembl 66                                                      | PreEnsembl 69              |
| <i>Sarcophilus harrisii</i>          | Ensembl 66    | Ensembl 66                                                         | Ensembl 65                 |
| <i>Solenodon paradoxus</i>           | JN633793      | AY530075                                                           | AY451972                   |
| <i>Sorex araneus</i>                 | AALT02132100  | AALT02072540                                                       | AALT02072540               |
| <i>Spermophilus tridecemlineatus</i> | Ensembl 66    | PreEnsembl 66                                                      | Ensembl 65                 |
| <i>Suricata suricatta</i>            | DQ082326 PNOc | JN633600 (5' end) JN414906 gene (3' end)                           | DQ082371                   |
| <i>Sus scrofa</i>                    | Ensembl 66    | Ensembl 66                                                         | AB091391                   |
| <i>Tadarida brasiliensis</i>         | AY059710      | AF203755                                                           | AY141019                   |
| <i>Talpa altaica</i>                 | XXXXXX        | JN414937 (5' end) AB176542 (3' end)                                | HG737946                   |
| <i>Tamias striatus</i>               | AY011821      | JN414975 (5' end) AY011879 gene (3' end)                           | AY011936                   |
| <i>Tapirus indicus</i>               | AY011857      | AY239186 (5' end) AY011914 (3' end)                                | AY011976                   |
| <i>Tarsipes rostratus</i>            | JN633778      | JN414881 (5' end) JN633583 gene                                    | JN633295                   |

| Name                               | PNOC          | Rag1                                                                  | Rag2                          |
|------------------------------------|---------------|-----------------------------------------------------------------------|-------------------------------|
|                                    |               | (middle) AY125030 (3' end)                                            |                               |
| <i>Tarsius bancanus</i>            | HM759679      | HM759141                                                              | HM758972                      |
| <i>Tarsius syrichta</i>            | HM759680      | Ensembl 66                                                            | Ensembl 65                    |
| <i>Thryonomys swinderianus</i>     | XXXXXX        | KJ742672                                                              | FM162098                      |
| <i>Tragulus napu</i>               | JN633791      | EU189404 (5' end) JN633597 (3' end)                                   | JN633309                      |
| <i>Trichechus manatus</i>          | AHIN01086509  | AHIN01010247                                                          | AHIN01010247                  |
| <i>Trichosurus vulpecula</i>       | JN633774      | JN414876 (5' end) JN633578 (middle)<br>AF303968 (3' end)              | JN633290                      |
| <i>Tupaia belangeri</i>            | Ensembl 66    | ALAR01194604 ALAR01194605<br>ALAR01194606                             | ALAR01194606                  |
| <i>Tupaia minor</i>                | HM759716      | XXXXXX                                                                | HM759010                      |
| <i>Tursiops truncatus</i>          | ABRN02276899  | Ensembl 66                                                            | Ensembl 65                    |
| <i>Urogale everetti</i>            | AF535069      | XXXXXX                                                                | FJ554996                      |
| <i>Ursus americanus</i>            | genome        | genome                                                                | genome                        |
| <i>Ursus arctos</i>                | AY011862      | genome                                                                | genome                        |
| <i>Ursus maritimus</i>             | Scaffold 89   | Scaffold 46                                                           | Scaffold 46                   |
| <i>Vicugna pacos</i>               | ABRR02046535  | Ensembl 66                                                            | Ensembl 65                    |
| <i>Vombatus ursinus</i>            | JN633779      | JN414882 (5' end) JN633584 gene<br>(middle) AY125038 (3' end)         | JN633296                      |
| <i>Allenopithecus nigroviridis</i> | HM759548      | HM759012                                                              | HM758835                      |
| <i>Alouatta sara</i>               | HM759640      | HM759100                                                              | HM758929                      |
| <i>Anolis carolinensis</i>         | XXXXXX        | XXXXXX                                                                | XXXXXX                        |
| <i>Cacajao calvus</i>              | HM759654      | HM759113                                                              | HM758942                      |
| <i>Callimico goeldii</i>           | HM759627      | HM759087                                                              | AY011961                      |
| <i>Cercocebus chrysogaster</i>     | HM759549      | HM759013                                                              | HM758836                      |
| <i>Cercopithecus albogularis</i>   | HM759552      | HM759016                                                              | HM758839                      |
| <i>Cercopithecus diana</i>         | HM759555      | HM759019                                                              | HM758842                      |
| <i>Cynopterus brachyotis</i>       | AY834580      | GQ410256                                                              | GQ410233                      |
| <i>Erinaceus concolor</i>          | AY011812      | AY011871 gene                                                         | AY011926                      |
| <i>Erythrocebus patas</i>          | HM759569      | HM759031                                                              | HM758854                      |
| <i>Eulemur mongoz</i>              | HM759695      | EU342315 (5' end) HM759154 (3'<br>end)                                | HM758989                      |
| <i>Galago senegalensis</i>         | HM759709      | HM759166                                                              | HM759003                      |
| <i>Gallus gallus</i>               | XXXXXX        | XXXXXX                                                                | XXXXXX                        |
| <i>Graphiurus murinus</i>          | XXXXXX        | JN414971 (5' end) AB253970 (3' end)                                   | JN633334 (5') & AY303206 (3') |
| <i>Haplemur griseus</i>            | HM759697      | HM759156                                                              | HM758991                      |
| <i>Hylobates agilis</i>            | HM759609      | HM759070                                                              | HM758897                      |
| <i>Hylobates muelleri</i>          | HM759612      | HM759073                                                              | HM758900                      |
| <i>Lagothrix lagotricha</i>        | HM759626      | HM759086                                                              | HM758914                      |
| <i>Leontopithecus rosalia</i>      | HM759636      | HM759095                                                              | HM758924                      |
| <i>Macaca fuscata</i>              | HM759575      | HM759035                                                              | HM758860                      |
| <i>Miopithecus ogouensis</i>       | HM759588      | HM759047                                                              | HM758873                      |
| <i>Moschus moschiferus</i>         | JN414849      | JN414862 gene                                                         | JN414991                      |
| <i>Neovison vison</i>              | GU931191      | AB109354                                                              | DQ660281                      |
| <i>Nomascus concolor</i>           | HM759613      | AY011901 gene                                                         | HM758901                      |
| <i>Ochotona hyperborea</i>         | AY011836      | AY011896 gene                                                         | AY011953                      |
| <i>Ornithorhynchus anatinus</i>    | XXXXXX        | NM_001242754_                                                         | AAPN01039734                  |
| <i>Panthera onca</i>               | DQ082320 PNOC | AB371342                                                              | DQ082365                      |
| <i>Pongo pygmaeus</i>              | HM759621      | HM759082                                                              | HM758910                      |
| <i>Propithecus diadema</i>         | HM759685      | HM759148                                                              | HM758980                      |
| <i>Pygathrix nemaus</i>            | XXXXXX        | HM759056                                                              | HM758882                      |
| <i>Rousettus lanosus</i>           | AY011848      | JN398298 gene                                                         | JN400925                      |
| <i>Saguinus fuscicollis</i>        | HM759665      | HM759123                                                              | HM758953                      |
| <i>Saimiri oerstedii</i>           | HM759671      | HM759130                                                              | HM758962                      |
| <i>Saimiri sciureus</i>            | HM759672      | HM759131                                                              | HM758963                      |
| <i>Semnopithecus entellus</i>      | HM759599      | HM759060                                                              | HM758886                      |
| <i>Sylvilagus floridanus</i>       | AY011835      | AY011895 gene                                                         | AY011952                      |
| <i>Symphalangus syndactylus</i>    | HM759616      | HM759076                                                              | HM758904                      |
| <i>Tachyglossus aculeatus</i>      | XXXXXX        | EF551558 (5' end) AF303971 (3' end<br>overlapping 5' region excluded) | JN633277                      |
| <i>Taeniopygia guttata</i>         | XXXXXX        | XXXXXX                                                                | XXXXXX                        |
| <i>Thyroptera tricolor</i>         | AY834598      | AY834657 gene                                                         | AY141028                      |
| <i>Trachypithecus francoisi</i>    | HM759603      | HM759065                                                              | HM758891                      |
| <i>Tupaia glis</i>                 | HM759715      | XXXXXX                                                                | HM759009                      |
| <i>Tamandua tetradactyla</i>       | AY011810      | AY011869 gene                                                         | AY011924                      |
| <i>Xenopus tropicalis</i>          | XXXXXX        | XXXXXX                                                                | XXXXXX                        |

| Name                               | TTN                                                          | TYRI          | VWF                                          |
|------------------------------------|--------------------------------------------------------------|---------------|----------------------------------------------|
| <i>Abrocoma bennettii</i>          | JN632939                                                     | JN633856      | JN415073                                     |
| <i>Acinonyx jubatus</i>            | LLWD01000088                                                 | LLWD01000164  | LLWD01000100                                 |
| <i>Acrobates pygmaeus</i>          | JN632879                                                     | JN633816      | FJ603136                                     |
| <i>Aepyprymnus rufescens</i>       | JN632884                                                     | JN633821      | EU160454                                     |
| <i>Ailuropoda melanoleuca</i>      | JN632922                                                     | ACTA01027567  | JN415051                                     |
| <i>Ailurus fulgens</i>             | JN632911                                                     | XXXXXX        | JN415043                                     |
| <i>Amblysomus hottentotus</i>      | JN632891                                                     | AY059714      | JN415023                                     |
| <i>Anomalurus beecrofti</i>        | JN632941                                                     | JN633858      | JN415075                                     |
| <i>Anoura geoffroyi</i>            | AY834686 and AY834718                                        | AY834617      | AY834738 (filled in at 5' end with FN645667) |
| <i>Antilocapra americana</i>       | JN632902                                                     | JN415019      | JN415028                                     |
| <i>Antrozous pallidus</i>          | AY834688 and AY834720                                        | AY834618      | AF447542                                     |
| <i>Aotus nancymae</i>              | JYKP01141924                                                 | JYKP01225816  | JYKP01064820                                 |
| <i>Aplodontia rufa</i>             | JN632942                                                     | JN633859      | AJ224662                                     |
| <i>Apodemus sylvaticus</i>         | LIPJ01004993                                                 | LIPJ01008495  | LIPJ01007048                                 |
| <i>Arctocephalus forsteri</i>      | JN632919                                                     | JN633844      | JN415048                                     |
| <i>Artibeus jamaicensis</i>        | AY834684 + JQ772104 + AY834717                               | AY012020      | AY834737                                     |
| <i>Ateles fusciceps</i>            | EU213055 + JQ772094 + EU213058                               | HM757562      | JN415070                                     |
| <i>Balaena mysticetus</i>          | bowhead genome scaffold_978                                  | scaffold 1506 | scaffold 1702                                |
| <i>Balaenoptera acutorostrata</i>  | ATDI01024049                                                 | HQ826957      | ATDI01107545 and ATDI01107546                |
| <i>Balaenoptera bonaerensis</i>    | BAUQ01145715                                                 | BAUQ01344277  | BAUQ01175274                                 |
| <i>Bison bison</i>                 | JPYT01071524 (5') and JPYT01156306 (middle) and JPYT01071525 | JPYT01010301  | JPYT01000203                                 |
| <i>Bos grunniens</i>               | AGSK01165435                                                 | AGSK01078389  | AGSK01073924                                 |
| <i>Bos indicus</i>                 | AGFL01014201                                                 | AGFL01203713  | AGFL01051781                                 |
| <i>Bos taurus</i>                  | Ensembl 65                                                   | HQ826962      | Ensembl 56                                   |
| <i>Bradypus tridactylus</i>        | JN632899                                                     | XXXXXX        | U31603                                       |
| <i>Bubalus bubalis</i>             | AWWX01487503                                                 | AWWX01575539  | AWWX01623774                                 |
| <i>Caenolestes fuliginosus</i>     | JN632874                                                     | JN633811      | AY243403                                     |
| <i>Callithrix jacchus</i>          | Ensembl 65                                                   | BBXK01014987  | AJ410299                                     |
| <i>Caluromys philander</i>         | JN632870                                                     | JN633807      | AY243404                                     |
| <i>Camelus bactrianus</i>          | GAEY01004921                                                 | CAOW010635054 | GAEX01015860                                 |
| <i>Camelus dromedarius</i>         | JWIN01034647                                                 | JWIN01031931  | GADT01063685                                 |
| <i>Camelus ferus</i>               | AGVR01055642                                                 | AGVR01047963  | AGVR01007186                                 |
| <i>Canis familiaris</i>            | Ensembl 65                                                   | Ensembl 68    | Ensembl 69                                   |
| <i>Caperea marginata</i>           | JN414992                                                     | JN415005      | JN415036                                     |
| <i>Capra aegagrus</i>              | CBYH010045874                                                | CBYH010068541 | CBYH010000807                                |
| <i>Capra hircus</i>                | AJPT01017489                                                 | AJPT01228320  | AJPT01060586                                 |
| <i>Capreolus capreolus</i>         | CCMK010189923                                                | CCMK010047128 | CCMK010000060                                |
| <i>Capromys pilorides</i>          | JN632944                                                     | XXXXXX        | AJ251142                                     |
| <i>Castor canadensis</i>           | EU142192 + JQ772108 + EU142207                               | AY011999      | AJ427228                                     |
| <i>Cavia apera</i>                 | AVPZ01000334                                                 | AVPZ01000345  | AVPZ01000009                                 |
| <i>Cavia porcellus</i>             | Build 3                                                      | Ensembl 68    | AAKN02051670                                 |
| <i>Cebus albifrons</i>             | JN632935                                                     | JN633852      | JN415071                                     |
| <i>Ceratotherium simum</i>         | AY834702 + AY834735                                          | AKZM01032842  | AKZM01041531                                 |
| <i>Cercartetus nanus</i>           | JN632880                                                     | JN633817      | EU160455                                     |
| <i>Cercocebus atys</i>             | JZLG01059007                                                 | JZLG01020435  | JZLG01065496                                 |
| <i>Cervus taiouanus</i>            | JN632904                                                     | AY011985      | JN415029                                     |
| <i>Cheirogaleus medius</i>         | XXXXXX                                                       | HM757598      | XXXXXX                                       |
| <i>Chinchilla lanigera</i>         | JN632946                                                     | AGCD01014860  | AJ238385                                     |
| <i>Chlorocebus sabaeus</i>         | AQIB01009852                                                 | AQIB01098642  | AQIB01143792                                 |
| <i>Choloepus didactylus</i>        | XXXXXX                                                       | XXXXXX        | AJ278160                                     |
| <i>Choloepus hoffmanni</i>         | KC149755                                                     | Ensembl 68    | JN415027                                     |
| <i>Chrysochloris asiatica</i>      | JN632892                                                     | AMDV01230520  | AMDV01115286                                 |
| <i>Colobus angolensis</i>          | JYKR01070210                                                 | JYKR01046860  | JYKR01009129                                 |
| <i>Condylura cristata</i>          | AJFV01005457                                                 | AJFV01042935  | AJFV01069741                                 |
| <i>Craseonycteris thonglongyai</i> | AY834698 + JQ772098 + AY834731                               | GU246539      | AY834742                                     |
| <i>Cratogeomys castanops</i>       | JN632955                                                     | JN633864      | XXXXXX                                       |
| <i>Cricetulus griseus</i>          | JN632947                                                     | AFTD01023952  | AFTD01048392                                 |
| <i>Crocota crocata</i>             | JN632914                                                     | JN633839      | AJ891084                                     |
| <i>Ctenodactylus gundi</i>         | JN632948                                                     | XXXXXX        | JN415077                                     |

| Name                                | TTN                                          | TYR1          | VWF          |
|-------------------------------------|----------------------------------------------|---------------|--------------|
| <i>Ctenomys boliviensis</i>         | JN632949                                     | JN633861      | XXXXXX       |
| <i>Cuniculus taczanowskii</i>       | JN632940                                     | JN633857      | JN415074     |
| <i>Cyclopes didactylus</i>          | JN632901                                     | XXXXXX        | AJ278156     |
| <i>Cynocephalus volans</i>          | EU142211 & JQ772095 & EU142197               | HM757456      | JN415063     |
| <i>Cynopterus sphinx</i>            | XXXXXX                                       | GAOV01008606  | DQ445697     |
| <i>Dasyprocta punctata</i>          | JN632950                                     | XXXXXX        | JN415079     |
| <i>Dasyopus novemcinctus</i>        | AAGV03231233                                 | Ensembl 68    | AJ278158     |
| <i>Dasyurus albopunctatus</i>       | JN632889                                     | JN633826      | AY243414     |
| <i>Daubentonia madagascariensis</i> | JN632936                                     | AGTM011609371 | AJ410293     |
| <i>Delphinapterus leucas</i>        | JN414997                                     | HQ826955      | AF231344     |
| <i>Desmodus rotundus</i>            | AY834685                                     | GU246548      | AF447550     |
| <i>Didelphis virginiana</i>         | JN632869                                     | AY011982      | JN415020     |
| <i>Dinomys branickii</i>            | JN632951                                     | AY012009      | AJ251145     |
| <i>Dipodomys heermanni</i>          | JN632956                                     | JN633865      | JN415081     |
| <i>Dipodomys ordii</i>              | Ensembl 65                                   | ABRO02020772  | ABRO02042796 |
| <i>Dromiciops gliroides</i>         | JN632872                                     | JN633809      | AY243407     |
| <i>Dugong dugon</i>                 | JN632896                                     | KR827299      | U31608       |
| <i>Echinops telfairi</i>            | AAIY02072547                                 | AAIY02171316  | AAIY02258420 |
| <i>Echymipera kalubu</i>            | JN632878                                     | JN633815      | AY243405     |
| <i>Eidolon helvum</i>               | AWHC01182472                                 | AWHC01071686  | AWHC01046735 |
| <i>Elephantulus edwardii</i>        | AMGZ01001997                                 | AMGZ01190015  | AMGZ01140941 |
| <i>Elephantulus rufescens</i>       | KC149753                                     | AY011996      | U31612       |
| <i>Elephas maximus</i>              | JN632898                                     | JN633832      | U31611       |
| <i>Emballonura atrata</i>           | AY834680 and AY834713                        | AY834612      | AF203776     |
| <i>Eptesicus fuscus</i>             | ALEH01020082                                 | ALEH01105971  | ALEH01056997 |
| <i>Equus asinus</i>                 | JREZ01000090                                 | JREZ01000687  | JREZ01000019 |
| <i>Equus caballus</i>               | Ensembl 56                                   | AAWR02017977  | AAWR02029168 |
| <i>Equus przewalskii</i>            | ATBW01012248                                 | ATBW01011868  | ATBW01009757 |
| <i>Erethizon dorsatum</i>           | JN632954                                     | AY012004      | AJ251135     |
| <i>Erinaceus europaeus</i>          | AMDU01175342                                 | Ensembl 68    | Ensembl 66   |
| <i>Eschrichtius robustus</i>        | JN414994                                     | JN415007      | AF108833     |
| <i>Eubalaena australis</i>          | JN414993                                     | JN415006      | JN415037     |
| <i>Eulemur flavifrons</i>           | LGHW01008072                                 | LGHW01001015  | LGHW01000852 |
| <i>Eulemur macaco</i>               | LGHX01007930                                 | LGHX01001009  | JX856260     |
| <i>Eumops auripendulus</i>          | AY834697 and AY834730                        | AY834624      | AY834741     |
| <i>Euphractus sexcinctus</i>        | XXXXXX                                       | AY011984      | AJ427364     |
| <i>Felis catus</i>                  | AY834699 + AY834732                          | AANG02171092  | AANG02135114 |
| <i>Fossa fossana</i>                | JN632912                                     | JN633837      | AJ891089     |
| <i>Fukomys damarensis</i>           | AYUG01115446                                 | AYUG01109901  | AYUG01152666 |
| <i>Furipterus horrens</i>           | AY834694 + JQ772099 + JQ772100 +<br>AY834727 | XXXXXX        | AY834740     |
| <i>Galeopterus variegatus</i>       | EU142196 and EU213056                        | HM757455      | U31606       |
| <i>Genetta genetta</i>              | JN632923                                     | JN633848      | JN415052     |
| <i>Glironia venusta</i>             | JN632871                                     | JN633808      | JN415021     |
| <i>Gorilla gorilla</i>              | Ensembl 65                                   | HM757529      | Ensembl 65   |
| <i>Heterocephalus glaber</i>        | JN632943                                     | AHKG01088373  | AJ251134     |
| <i>Heterohyrax brucei</i>           | JN632895                                     | JN633830      | JN415026     |
| <i>Hippopotamus amphibius</i>       | JN632906                                     | HQ826958      | AF108832     |
| <i>Hipposideros commersoni</i>      | AY834675 + JQ772101 + AY834708               | GU246538      | JN415056     |
| <i>Homo sapiens</i>                 | Ensembl 56                                   | Ensembl 68    | ADDF02212640 |
| <i>Hoplomys gymnurus</i>            | JN632953                                     | JN633863      | JN415080     |
| <i>Hydrochoeris hydrochaeris</i>    | JN632957                                     | AY012007      | AJ251137     |
| <i>Hydrodamalis gigas</i>           | consensus                                    | KR827302      | Consensus    |
| <i>Hylobates lar</i>                | XXXXXX                                       | HM757522      | AJ410300     |
| <i>Hypsiprymnodon moschatus</i>     | JN632885                                     | JN633822      | FJ603139     |
| <i>Hystrix brachyura</i>            | JN632958                                     | AY012003      | JN415082     |
| <i>Inia geoffrensis</i>             | JN414996                                     | JN415009      | AF304107     |
| <i>Isodon macrourus</i>             | JN632876                                     | JN633813      | EU160456     |
| <i>Jaculus jaculus</i>              | JN632952                                     | AKZC01121251  | AKZC01270745 |
| <i>Kogia breviceps</i>              | JN414999                                     | JN415012      | JN415039     |
| <i>Lama glama</i>                   | JN632903                                     | AY012025      | AF108835     |
| <i>Laonastes aenigmamus</i>         | JN632963                                     | XXXXXX        | AM407898     |
| <i>Lemur catta</i>                  | EU142198 and EU142212                        | HM757614      | AJ410292     |
| <i>Leptonychotes weddellii</i>      | APMU01055982                                 | APMU01009345  | APMU01072425 |
| <i>Lipotes vexillifer</i>           | AUPI01035337                                 | AUPI01086990  | AUPI01140634 |
| <i>Loxodonta africana</i>           | Ensembl 65                                   | AAGU03072976  | Ensembl 66   |

| Name                              | TTN                                                                                                                                                                                                                     | TYR1                                         | VWF                                                                                                                         |
|-----------------------------------|-------------------------------------------------------------------------------------------------------------------------------------------------------------------------------------------------------------------------|----------------------------------------------|-----------------------------------------------------------------------------------------------------------------------------|
| <i>Macaca fascicularis</i>        | CAEC01071493                                                                                                                                                                                                            | MAFATYR1                                     | AEHL01095347 c                                                                                                              |
| <i>Macaca mulatta</i>             | Ensembl 65                                                                                                                                                                                                              | AEHK01074654                                 | AJ410302                                                                                                                    |
| <i>Macaca nemestrina</i>          | JZLF01057388                                                                                                                                                                                                            | JZLF01057276                                 | JZLF01093863                                                                                                                |
| <i>Macroderma gigas</i>           | AY834677 and AY834710                                                                                                                                                                                                   | AY834609                                     | AY834736                                                                                                                    |
| <i>Macropus eugenii</i>           | Ensembl 66                                                                                                                                                                                                              | Ensembl 68                                   | ABQO020079955 (5'),<br>ABQO020135504 (3') and filled in<br>gap with FJ603261                                                |
| <i>Macroscelides proboscideus</i> | XXXXXX                                                                                                                                                                                                                  | AY011995                                     | KF742646                                                                                                                    |
| <i>Macrotis lagotis</i>           | JN632877                                                                                                                                                                                                                | JN633814                                     | EU369371                                                                                                                    |
| <i>Mandrillus leucophaeus</i>     | JYKQ01141049                                                                                                                                                                                                            | JYKQ01103113                                 | JYKQ01092439                                                                                                                |
| <i>Manis pentadactyla</i>         | JPTV01002520                                                                                                                                                                                                            | XXXXXX                                       | JN415053                                                                                                                    |
| <i>Manis tricuspis</i>            | JN632925                                                                                                                                                                                                                | JN633849                                     | JN415054                                                                                                                    |
| <i>Marmota marmota</i>            | CEEU01000009                                                                                                                                                                                                            | CEEU01000004                                 | CEEU01000070                                                                                                                |
| <i>Megaderma lyra</i>             | AY834676 and AY834709                                                                                                                                                                                                   | AWHB01105368                                 | U31616                                                                                                                      |
| <i>Megaptera novaeangliae</i>     | JN632909                                                                                                                                                                                                                | JF768702 TYR                                 | AF226849                                                                                                                    |
| <i>Meles meles</i>                | JN632916                                                                                                                                                                                                                | JN633841                                     | JN415045                                                                                                                    |
| <i>Mephitis mephitis</i>          | JN632915                                                                                                                                                                                                                | JN633840                                     | JN415044                                                                                                                    |
| <i>Mesocricetus auratus</i>       | APMT01009738                                                                                                                                                                                                            | APMT01181278                                 | FM162063                                                                                                                    |
| <i>Mesoplodon bidens</i>          | JN414995                                                                                                                                                                                                                | JN415008                                     | JN415038                                                                                                                    |
| <i>Microcebus murinus</i>         | EU142199 and EU213057                                                                                                                                                                                                   | ABDC01354122                                 | ABDC01024492                                                                                                                |
| <i>Microtus agrestis Northern</i> | LIQJ01001268 WGS specimen from England                                                                                                                                                                                  | WGS specimen from<br>England<br>LIQJ01000362 | WGS specimen from England<br>LIQJ01001756 deleted string of Ns                                                              |
| <i>Microtus ochrogaster</i>       | AHZW01000408                                                                                                                                                                                                            | AHZW01108140                                 | AHZW01018231                                                                                                                |
| <i>Monodelphis domestica</i>      | Ensembl 56                                                                                                                                                                                                              | Ensembl 68 and<br>AAFR03058142               | AY243415 and AAFR03037678 to<br>fill in 5' and 3' ends<br>(AAFR03037678 has problems in<br>middle)                          |
| <i>Mus musculus</i>               | Ensembl 65                                                                                                                                                                                                              | Ensembl 68                                   | AJ238390                                                                                                                    |
| <i>Mustela putorius</i>           | AGTQ01012763                                                                                                                                                                                                            | PreEnsembl 68                                | AGTQ01027201                                                                                                                |
| <i>Myocastor coypus</i>           | JN632945                                                                                                                                                                                                                | AY012008                                     | AJ251140                                                                                                                    |
| <i>Myodes glareolus</i>           | LIP101003205                                                                                                                                                                                                            | LIP101003344                                 | LIP101000554                                                                                                                |
| <i>Myotis brandtii</i>            | ANKR01159991                                                                                                                                                                                                            | ANKR01282680                                 | ANKR01250225                                                                                                                |
| <i>Myotis daubentonii</i>         | AY834722                                                                                                                                                                                                                | AY834620                                     | FN645681                                                                                                                    |
| <i>Myotis davidii</i>             | ALWT01078190                                                                                                                                                                                                            | ALWT01070109                                 | ALWT01049484                                                                                                                |
| <i>Myotis lucifugus</i>           | Ensembl 65                                                                                                                                                                                                              | Ensembl 68                                   | AAPE02006987                                                                                                                |
| <i>Myrmecobius fasciatus</i>      | JN632890                                                                                                                                                                                                                | JN633827                                     | FJ603134                                                                                                                    |
| <i>Myrmecophaga tridactyla</i>    | JN632900                                                                                                                                                                                                                | AY011987                                     | AJ278157                                                                                                                    |
| <i>Mystacina tuberculata</i>      | AY834693 and AY834726                                                                                                                                                                                                   | AY834622                                     | AY245421                                                                                                                    |
| <i>Myzopoda aurita</i>            | AY834691 and AY834723                                                                                                                                                                                                   | XXXXXX                                       | XXXXXX                                                                                                                      |
| <i>Nandinia binotata</i>          | JN632917                                                                                                                                                                                                                | JN633842                                     | JN415046                                                                                                                    |
| <i>Nannospalax ehrenbergi</i>     | JN632964                                                                                                                                                                                                                | JN633869                                     | FM162064                                                                                                                    |
| <i>Nannospalax galili</i>         | AXCS01203851                                                                                                                                                                                                            | AXCS01131931                                 | AXCS01230560                                                                                                                |
| <i>Nasalis larvatus</i>           | JMHX01319541                                                                                                                                                                                                            | JMHX01319543                                 | JMHX01319540                                                                                                                |
| <i>Natalus stramineus</i>         | AY834695 + JQ772103 + AY834728                                                                                                                                                                                          | AY834623                                     | AF447545                                                                                                                    |
| <i>Noctilio albiventris</i>       | AY834687 and AY834719                                                                                                                                                                                                   | XXXXXX                                       | JN415059                                                                                                                    |
| <i>Nomascus leucogenys</i>        | Ensembl 65                                                                                                                                                                                                              | Ensembl 68                                   | ADFV01078399                                                                                                                |
| <i>Notoryctes typhlops</i>        | JN632873                                                                                                                                                                                                                | JN633810                                     | AY243408                                                                                                                    |
| <i>Nycteris thebaica</i>          | JN632928                                                                                                                                                                                                                | XXXXXX                                       | AF447548                                                                                                                    |
| <i>Nycticebus coucang</i>         | JN632938                                                                                                                                                                                                                | HM757625                                     | JN415072                                                                                                                    |
| <i>Nyctimene albiventer</i>       | AY834673 and AY834706                                                                                                                                                                                                   | GU246545 t                                   | AF447549                                                                                                                    |
| <i>Ochotona princeps</i>          | Ensembl 69 with deletion of one bp frameshift<br>insertion (G) at position 975 based on trace file<br>1496864946, insertion of A at 1708 based on<br>1496864946, and deletion of extra A at 4121<br>based on 1544699849 | Ensembl 68                                   | AJ224672                                                                                                                    |
| <i>Octodon degus</i>              | AJSA01106293                                                                                                                                                                                                            | AJSA01229446                                 | AJSA01193039                                                                                                                |
| <i>Octodontomys gliroides</i>     | JN632960                                                                                                                                                                                                                | XXXXXX                                       | JN415084                                                                                                                    |
| <i>Odobenus rosmarus</i>          | ANOP01022688                                                                                                                                                                                                            | ANOP01046915                                 | JN415047                                                                                                                    |
| <i>Okapia johnstoni</i>           | JN632905                                                                                                                                                                                                                | JN415018                                     | JN415030                                                                                                                    |
| <i>Orcinus orca Norway</i>        | ANOL01017199                                                                                                                                                                                                            | ANOL02030843                                 | ANOL02052272                                                                                                                |
| <i>Orycteropus afer</i>           | JN632894                                                                                                                                                                                                                | ALYB01075219                                 | ALYB01067595                                                                                                                |
| <i>Oryctolagus cuniculus</i>      | Ensembl 65                                                                                                                                                                                                              | Ensembl 68                                   | AAGW02051557 and Ensembl<br>(deleted 1 bp frameshift gap at<br>position 6 based on trace files<br>1946567236 and 651097624) |



| Name                                 | TTN                                                                                       | TYR1          | VWF                                                     |
|--------------------------------------|-------------------------------------------------------------------------------------------|---------------|---------------------------------------------------------|
| <i>Otolemur garnettii</i>            | Ensembl 65                                                                                | AAQR03000569  | Ensembl 69                                              |
| <i>Ovis aries</i>                    | AMGL01052441                                                                              | AMGL01060397  | CBYI010022648                                           |
| <i>Pan paniscus</i>                  | AJFE01051646 cntg51879                                                                    | AJFE01118605  | AJFE01069496                                            |
| <i>Pan troglodytes</i>               | Build 3                                                                                   | Ensembl 68    | PTU31620                                                |
| <i>Panthera tigris</i>               | ATCQ01063976 and ATCQ01063977 (used 77 in region of overlap where there were differences) | ATCQ01037869  | ATCQ01098059                                            |
| <i>Pantholops hodgsonii</i>          | Scaffold 730                                                                              | Scaffold 364  | AGTT01142904                                            |
| <i>Papio anubis</i>                  | AHZZ01042829                                                                              | AHZZ01062486  | AHZZ01078155                                            |
| <i>Papio hamadryas</i>               | PreEnsembl 65                                                                             | PreEnsembl 68 | PreEnsembl 65 (string of Ns is too short in PreEnsembl) |
| <i>Pecari tajacu</i>                 | JN632907                                                                                  | JN633834      | JN415033                                                |
| <i>Pedetes capensis</i>              | EU142193 and EU142208                                                                     | AY012000      | XXXXXX                                                  |
| <i>Peromyscus maniculatus</i>        | AYHN01011787                                                                              | AYHN01075377  | YHN01088587                                             |
| <i>Petaurus breviceps</i>            | JN632881                                                                                  | JN633818      | AY243417                                                |
| <i>Petromus typicus</i>              | JN632961                                                                                  | JN633867      | AJ251144                                                |
| <i>Phascolarctos cinereus</i>        | JN632883                                                                                  | JN633820      | AY243406                                                |
| <i>Phoca vitulina</i>                | JN632920                                                                                  | JN633845      | JN415049                                                |
| <i>Phocoena phocoena</i>             | JN414998                                                                                  | JN415011      | AF061060                                                |
| <i>Physeter macrocephalus</i>        | JN415000                                                                                  | AWZP01033371  | AF108834                                                |
| <i>Pithecia pithecia</i>             | JX869921                                                                                  | HM757594      | AJ410298                                                |
| <i>Platanista minor</i>              | JN415001                                                                                  | JN415014      | JN415040                                                |
| <i>Podogymnura truei</i>             | JN632930                                                                                  | JN633851      | JN415064                                                |
| <i>Pongo abelii</i>                  | XM_002812635                                                                              | Ensembl 68    | ABGA01063077                                            |
| <i>Pontoporia blainvillei</i>        | JN415002                                                                                  | JN415015      | JN415041                                                |
| <i>Prionodon linsang</i>             | JN632910                                                                                  | JN633836      | JN415042                                                |
| <i>Procavia capensis</i>             | KC149754                                                                                  | AY011993      | U31619                                                  |
| <i>Procyon lotor</i>                 | JN632921                                                                                  | JN633846      | JN415050                                                |
| <i>Propithecus coquereli</i>         | JZKE01162408                                                                              | JZKE01070264  | JZKE01028614                                            |
| <i>Propithecus verreauxi</i>         | XXXXXX                                                                                    | HM757606      | AJ410294                                                |
| <i>Pseudocheirus cupreus</i>         | JN632886                                                                                  | JN633823      | FJ603135                                                |
| <i>Pteronotus parnellii</i>          | AWGZ01396272 (first 3850 bp) and AWGZ01396271 (rest)                                      | AWGZ01343413  | AY245420                                                |
| <i>Pteropus alecto</i>               | ALWS01095595                                                                              | ALWS01169712  | ALWS01057486                                            |
| <i>Pteropus giganteus</i>            | JN632929                                                                                  | GU246547      | JN415060                                                |
| <i>Pteropus vampyrus</i>             | Ensembl 65                                                                                | ABRP01196952  | ABRP01038666                                            |
| <i>Ptilocercus lowii</i>             | EU142205 + JQ772107 + EU142214                                                            | EU142216      | JN415068                                                |
| <i>Rattus norvegicus</i>             | XM_001065955                                                                              | Ensembl 68    | AJ224673 VWF gene                                       |
| <i>Rhinolophus creaghi</i>           | AY834674 + JQ772105 + AY834707                                                            | AY834607      | AF447546                                                |
| <i>Rhinolophus ferrumequinum</i>     | AWHA01032626                                                                              | AWHA01214112  | AWHA01014377                                            |
| <i>Rhinopithecus roxellana</i>       | JABR01007721                                                                              | JABR01101551  | JABR01085496                                            |
| <i>Rhinopoma hardwickii</i>          | AY834679 and AY834712                                                                     | AY834611      | JN415061                                                |
| <i>Rhogeessa tumida</i>              | AY834689 and AY834721                                                                     | AY834619      | AF447543                                                |
| <i>Rhynchocyon petersi</i>           | JN632893                                                                                  | JN633829      | JN415025                                                |
| <i>Rhyncholestes raphanurus</i>      | JN632875                                                                                  | JN633812      | AY243416                                                |
| <i>Saccopteryx bilineata</i>         | JN632926                                                                                  | JN633850      | JN415055                                                |
| <i>Saimiri boliviensis</i>           | AGCE01012640                                                                              | PreEnsembl 68 | AGCE01132938                                            |
| <i>Sarcophilus harrisii</i>          | Ensembl 65                                                                                | Ensembl 68    | Ensembl 65                                              |
| <i>Solenodon paradoxus</i>           | JN632931                                                                                  | AY530077      | AY530079                                                |
| <i>Sorex araneus</i>                 | JN632932                                                                                  | Ensembl 68    | AALT02094936                                            |
| <i>Spermophilus tridecemlineatus</i> | PreEnsembl 66                                                                             | Ensembl 68    | Ensembl 65                                              |
| <i>Suricata suricatta</i>            | JN632913                                                                                  | JN633838      | AJ891099                                                |
| <i>Sus scrofa</i>                    | Build 2                                                                                   | HQ826959      | JN415032                                                |
| <i>Tadarida brasiliensis</i>         | AY834696 and AY834729                                                                     | AY059715      | JN415058                                                |
| <i>Talpa altaica</i>                 | JN632933                                                                                  | AY011988      | JN415065                                                |
| <i>Tamias striatus</i>               | EU142191 + EU142206                                                                       | AY011998      | JN415085                                                |
| <i>Tapirus indicus</i>               | JN632934                                                                                  | JF718847      | JN415067                                                |
| <i>Tarsipes rostratus</i>            | JN632887                                                                                  | JN633824      | FJ603137                                                |
| <i>Tarsius bancanus</i>              | XXXXXX                                                                                    | HM757595      | AJ410296                                                |
| <i>Tarsius syrichta</i>              | KC113269 (segment 1)                                                                      | Ensembl 68    | ABRT02430124 and ABRT02430125                           |
| <i>Thryonomys swinderianus</i>       | JN632962                                                                                  | JN633868      | AJ224674                                                |
| <i>Tragulus napu</i>                 | JN632908                                                                                  | JN633835      | JN415034                                                |
| <i>Trichechus manatus</i>            | JN632897                                                                                  | AHIN01146985  | AHIN01124423                                            |
| <i>Trichosurus vulpecula</i>         | JN632882                                                                                  | JN633819      | JN415022                                                |
| <i>Tupaia belangeri</i>              | Ensembl 65                                                                                | AAPY01628164  | ALAR01234110                                            |

| Name                               | TTN                              | TYR1         | VWF                                                       |
|------------------------------------|----------------------------------|--------------|-----------------------------------------------------------|
| <i>Tupaia_minor</i>                | EU142203 + EU142213              | FJ554965     | JN415069                                                  |
| <i>Tursiops_truncatus</i>          | JN415003                         | HQ826956     | JN415035                                                  |
| <i>Urogale_everetti</i>            | EU142204 and EU213059            | FJ554974     | FJ555018                                                  |
| <i>Ursus_americanus</i>            | genome                           | genome       | genome                                                    |
| <i>Ursus_arctos</i>                | genome                           | genome       | genome                                                    |
| <i>Ursus_maritimus</i>             | G10K scaffold 2                  | Scaffold 152 | scaffold 178                                              |
| <i>Vicugna_pacos</i>               | ABRR02094169                     | ABRR02150084 | XM_006210921                                              |
| <i>Vombatus_ursinus</i>            | JN632888                         | JN633825     | AF497260                                                  |
| <i>Allenopithecus_nigroviridis</i> | JX869897                         | HM757457     | JX856250                                                  |
| <i>Alouatta_sara</i>               | JX869898                         | HM757553     | JX856251                                                  |
| <i>Anolis_carolinensis</i>         | Ensembl 56                       | XXXXXX       | AAWZ02019410                                              |
| <i>Cacajao_calvus</i>              | JX869899                         | HM757565     | JX856253                                                  |
| <i>Callimico_goeldii</i>           | JX869901                         | HM757539     | JX856255                                                  |
| <i>Cercocebus_chrysogaster</i>     | JX869902                         | HM757458     | JX856256                                                  |
| <i>Cercopithecus_albogularis</i>   | JX869903                         | HM757461     | JX856257                                                  |
| <i>Cercopithecus_diana</i>         | XXXXXX                           | HM757464     | XXXXXX                                                    |
| <i>Cynopterus_brachyotis</i>       | AY834671 and AY834704            | AY834605     | GQ410279                                                  |
| <i>Erinaceus_concolor</i>          | XXXXXX                           | XXXXXX       | KF783089                                                  |
| <i>Erythrocebus_patas</i>          | JX869905                         | HM757478     | JX856259                                                  |
| <i>Eulemur_mongoz</i>              | XXXXXX                           | HM757610     | XXXXXX                                                    |
| <i>Galago_senegalensis</i>         | JX869909                         | HM757622     | JX856263                                                  |
| <i>Gallus_gallus</i>               | Ensembl 56                       | XXXXXX       | AADN03000107                                              |
| <i>Graphiurus_murinus</i>          | JN632959                         | JN633866     | JN415083                                                  |
| <i>Haplemur_griseus</i>            | XXXXXX                           | HM757612     | JX856265                                                  |
| <i>Hylobates_agilis</i>            | XXXXXX                           | HM757521     | XXXXXX                                                    |
| <i>Hylobates_muelleri</i>          | XXXXXX                           | HM757524     | XXXXXX                                                    |
| <i>Lagothrix_lagotricha</i>        | JX869911                         | HM757538     | JX856266                                                  |
| <i>Leontopithecus_rosalia</i>      | JX869912                         | HM757548     | JX856267                                                  |
| <i>Macaca_fuscata</i>              | XXXXXX                           | HM757484     | XXXXXX                                                    |
| <i>Miopithecus_ogouensis</i>       | JX869914                         | HM757497     | JX856270                                                  |
| <i>Moschus_moschiferus</i>         | JN415004                         | HQ826954     | JN415031, listed as M. sp. in GenBank, but M. moschiferus |
| <i>Neovison_vison</i>              | XXXXXX                           | EU627590     | AB285413                                                  |
| <i>Nomascus_concolor</i>           | XXXXXX                           | HM757525     |                                                           |
| <i>Ochotona_hyperborea</i>         | EU142195, KC149756, and EU142210 | AY012011     | XXXXXX                                                    |
| <i>Ornithorhynchus_anatinus</i>    | Ensembl 56                       | AAPN01274682 | XXXXXX                                                    |
| <i>Panthera_onca</i>               | XXXXXX                           | AY012031     | AB371364                                                  |
| <i>Pongo_pygmaeus</i>              | JX869922                         | HM757533     | JX856283                                                  |
| <i>Propithecus_diadema</i>         | XXXXXX                           | HM757603     | XXXXXX                                                    |
| <i>Pygathrix_nemaeus</i>           | JX869924                         | PNTYR1       | JX856275                                                  |
| <i>Rousettus_lanosus</i>           | AY834672 and AY834705            | GU246542     | XXXXXX                                                    |
| <i>Saguinus_fuscicollis</i>        | JX869925                         | HM757575     | JX856276                                                  |
| <i>Saimiri_oerstedii</i>           | JX869926                         | HM757584     | JX856277                                                  |
| <i>Saimiri_sciureus</i>            | PreEnsembl 66                    | HM757585     | XXXXXX                                                    |
| <i>Semnopithecus_entellus</i>      | JX869927                         | HM757510     | JX856278                                                  |
| <i>Sylvilagus_floridanus</i>       | EU142194 and EU142209            | AY012010     | XXXXXX                                                    |
| <i>Symphalangus_syndactylus</i>    | XXXXXX                           | HM757528     | JX856279                                                  |
| <i>Tachyglossus_aculeatus</i>      | JN632868                         | XXXXXX       | XXXXXX                                                    |
| <i>Taeniopygia_guttata</i>         | Ensembl 56                       | XXXXXX       | ABQF01036130                                              |
| <i>Thyroptera_tricolor</i>         | JQ772106 + AY834725              | XXXXXX       | AY834739                                                  |
| <i>Trachypithecus_francoisi</i>    | JX869929                         | HM757515     | JX856281                                                  |
| <i>Tupaia_glis</i>                 | XXXXXX                           | HM757628     | AF061063                                                  |
| <i>Tamandua_tetradactyla</i>       | XXXXXX                           | AY011986     | AJ278161                                                  |
| <i>Xenopus_tropicalis</i>          | Ensembl 56                       | XXXXXX       | XXXXXX                                                    |

Notes: All *Hydrodamalis* sequences are consensus sequences based on multiple individuals (all accession numbers provided in Springer et al. [28]). XXXXX denotes missing sequence data.

Table S2. Calibrations used in molecular dating analyses<sup>A</sup>

| Clade                                | Oldest crown fossil          | Minimum age | Maximum age | References for oldest fossil(s) and discussion of calibration |
|--------------------------------------|------------------------------|-------------|-------------|---------------------------------------------------------------|
| 1. Tetrapoda                         | <i>Lethiscus stocki</i>      | 337         | 351         | [1]                                                           |
| 2. Amniota                           | <i>Hylonomus lyelli</i>      | 318         | 332.9       | [1]                                                           |
| 3. Sauropsida                        | <i>Protorosaurus speneri</i> | 255.9       | 295.5       | [1]                                                           |
| 4. Neognathae                        | <i>Vegavis iaii</i>          | 66.0        | 86.8        | [1]                                                           |
| 5. Mammalia                          | <i>Ambondro mahabo</i>       | 164.9       | 227         | [1-7]                                                         |
| 6. Monotremata                       | <i>Obdurodon insignis</i>    | 25.0        | 121         | [7-9]                                                         |
| 7. Caenolestidae                     | None                         | 0           | 15.97       | [7, 10, 11]                                                   |
| 8. Didelphimorphia + Australidelphia | <i>Peradectes</i>            | 65.18       | 83.8        | [7, 12]                                                       |
| 9. Didelphidae                       | <i>Micoureus laventicus</i>  | 11.608      | 20.44       | [7, 13]                                                       |
| 10. Didelphimorphia                  | <i>Micoureus laventicus</i>  | 11.608      | 66.0        | [7]                                                           |
| 11. Dasyuromorphia                   | <i>Barinya wangala</i>       | 15.97       | 54.65       | [7, 14]                                                       |
| 12. Peramelidae                      | cf. <i>Peroryctes</i>        | 4.36        | 23.8        | [7, 15]                                                       |
| 13. Peramelemorphia                  | cf. <i>Peroryctes</i>        | 4.36        | 54.65       | [7, 15, 16]                                                   |
| 14. Burramyidae + Phalangeridae      | <i>Eocuscus sarastamppi</i>  | 25.0        | 54.65       | [7, 17]                                                       |
| 15. Petauridae + Pseudocheiridae     | <i>Paljara</i> sp. A         | 25.5        | 54.65       | [7, 18]                                                       |
| 16. Macropodidae + Potoroidae        | <i>Bulungamaya delicata</i>  | 24.7        | 54.65       | [7, 9, 18-20]                                                 |
| 17. Vombatiformes                    | <i>Perikoala robusta</i>     | 25.5        | 54.65       | [7, 18]                                                       |
| 18. Placentalia                      | <i>Purgatorius</i>           | 65.2        | 131.5       | [21, 22]                                                      |
| 19. Chrysochloridae                  | <i>Amblysomus julianae</i>   | 1.7         | 33.9        | [7, 23, 24]                                                   |

| Clade                                    | Oldest crown fossil                                        | Minimum age | Maximum age       | References for oldest fossil(s) and discussion of calibration |
|------------------------------------------|------------------------------------------------------------|-------------|-------------------|---------------------------------------------------------------|
| 20. Macroscelidea                        | <i>Myohyrax</i>                                            | 15.97       | 56.0              | [7, 25, 26]                                                   |
| 21. Hyracoidea                           | <i>Dendrohyrax</i>                                         | 6.08        | 11.62             | [7, 27, 28]                                                   |
| 22. Proboscidea                          | <i>Loxodonta</i>                                           | 6.8         | 11.62             | [7, 29, 30]                                                   |
| 23. Hyracoidea + Proboscidea             | <i>Eritherium azzouzorom</i>                               | 59.2        | 72.3              | [7, 31, 32]                                                   |
| 24. Sirenia                              | <i>Eotheroides aegyptiacum</i>                             | 41.3        | 59.2              | [7, 28, 33-35]                                                |
| 25. Dugongidae                           | <i>Crenatosiren olseni</i>                                 | 28.1        | 38.0              | [28]                                                          |
| 26. Paenungulata                         | <i>Eritherium azzouzorom</i>                               | 59.2        | 72.3              | [7, 31, 32]                                                   |
| 27. Xenarthra                            | <i>Riostegotherium</i>                                     | 47.8        | 66.0              | [7, 36, 37]                                                   |
| 28. Pilosa                               | <i>Pseudoglyptodon chilensis</i>                           | 31.5        | 66.0              | [7]                                                           |
| 29. Tardigrada                           | Megalonychidae fossils                                     | 15.97       | 41.3              | [7]                                                           |
| 30. Vermilingua                          | <i>Protamandua</i>                                         | 15.97       | 56.0              | [7, 38]                                                       |
| 31. Prionodontidae + Felidae             | <i>Proailurus lemanensis</i> ,<br><i>Stenogale julieni</i> | 28.1        | 41.3              | [7, 39-41]                                                    |
| 32. Herpestidae + Eupleridae + Hyaenidae | <i>Protictitherium</i>                                     | 15.97       | 28.1 <sup>B</sup> | [42]                                                          |
| 33. Carnivora                            | <i>Hesperocyon gregarious</i>                              | 38.0        | 66.0              | [7, 21, 40, 43]                                               |
| 34. Mustelidae + Procyonidae             | <i>Promartes</i>                                           | 24.8        | 38.0 <sup>B</sup> | [44];<br>Paleobiology<br>Database                             |
| 35. Musteloidea                          | <i>Promartes</i>                                           | 24.8        | 38.0              | [44];<br>Paleobiology<br>Database                             |
| 36. Odobenidae + Otariidae               | <i>Proneotherium</i>                                       | 16.6        | 28.1              | [45]                                                          |
| 37. Pinnipedia                           | <i>Desmatophoca brachycephala</i>                          | 20.43       | 33.9 <sup>B</sup> | [46]                                                          |
| 38. Pinnipedia + Musteloidea             | <i>Promartes</i>                                           | 24.8        | 38.0              | [44];<br>Paleobiology<br>Database                             |

| Clade                                                         | Oldest crown fossil                                                           | Minimum age | Maximum age       | References for oldest fossil(s) and discussion of calibration |
|---------------------------------------------------------------|-------------------------------------------------------------------------------|-------------|-------------------|---------------------------------------------------------------|
| 39. Arctoidea                                                 | <i>Cephalogale</i>                                                            | 28.1        | 41.3              | [7]                                                           |
| 40. Caniformia                                                | <i>Hesperocyon gregarius</i>                                                  | 38.0        | 56.0              | [7]                                                           |
| 41. Ostentoria                                                | <i>Ravenictis</i>                                                             | 64.0        | 83.8              | [47]                                                          |
| 42. Craseonycteridae + Megadermatidae                         | <i>Saharaderma</i>                                                            | 33.9        | 47.8              | [7, 48]                                                       |
| 43. Hipposideridae + Rhinolophidae                            | <i>Hipposideros</i>                                                           | 38.0        | 56.0              | [7, 48, 49]                                                   |
| 44. Chiroptera                                                | <i>Tachypterum franzeni</i> , <i>Witwatia sigei</i> , <i>Dizzya exsultans</i> | 47.8        | 66.0              | [7, 50-52]                                                    |
| 45. Emballonuridae + Nycteridae                               | <i>Tachypterum franzeni</i>                                                   | 47.8        | 59.2              | [7, 50, 52]                                                   |
| 46. Molossidae + Vespertilionidae + Miniopteridae             | <i>Wallia scalopidens</i>                                                     | 38.0        | 56.0              | [7, 48, 53]                                                   |
| 47. Molossidae + Vespertilionidae + Miniopteridae + Natalidae | <i>Wallia scalopidens</i>                                                     | 38.0        | 56.0              | [7, 48, 53]                                                   |
| 48. Yangochiroptera                                           | <i>Tachypterum franzeni</i> , <i>Witwatia sigei</i> , <i>Dizzya exsultans</i> | 47.8        | 61.6              | [7, 50, 51]                                                   |
| 49. Furipteridae + Noctilionidae                              | <i>Noctilio lacrimaelunaris</i>                                               | 5.332       | 33.9              | [7, 54]                                                       |
| 50. Phyllostomidae + Mormoopidae                              | Mormoopid, gen. et sp. nov.                                                   | 28.1        | 41.3              | [7, 49, 55, 56]                                               |
| 51. Erinaceidae                                               | <i>Neurogymnurus indricotherii</i> , <i>Palaeoscaptor acridens</i>            | 28.1        | 47.8              | [9]                                                           |
| 52. Erinaceidae + Soricidae                                   | <i>Adunator ladae</i>                                                         | 61.6        | 83.8              | [1, 7, 21, 57]                                                |
| 53. Cetartiodactyla                                           | <i>Himalayacetus</i>                                                          | 52.5        | 66.0 <sup>C</sup> | [7]                                                           |
| 54. Giraffidae to Antilocapridae                              | <i>Canthumeryx</i>                                                            | 17.8        | 28.1              | [7, 58, 59]                                                   |
| 55. Moschidae to Bovidae                                      | <i>Eotragus noyei</i>                                                         | 18.0        | 28.1              | [7, 60]                                                       |

| Clade                                                                                             | Oldest crown fossil                                          | Minimum age | Maximum age        | References for oldest fossil(s) and discussion of calibration |
|---------------------------------------------------------------------------------------------------|--------------------------------------------------------------|-------------|--------------------|---------------------------------------------------------------|
| 56. Suidae to Tayassuidae                                                                         | <i>Hyotherium, Nguruwe</i>                                   | 15.97       | 38.0               | [7, 61]                                                       |
| 57. Whippomorpha                                                                                  | <i>Himalayacetus</i>                                         | 52.5        | 61.6 <sup>A</sup>  | [7]                                                           |
| 58. Cetacea                                                                                       | <i>Llanocetus denticrenatus</i>                              | 34          | 47.8               | [7, 62]                                                       |
| 59. Neobalaenidae + Balaenopteroidea                                                              | <i>Mauicetus</i>                                             | 23.03       | 33.9 <sup>B</sup>  | [63, 64]                                                      |
| 60. Balaenopteroidea                                                                              | <i>Plesiobalaenoptera</i>                                    | 7.3         | 13.82 <sup>B</sup> | [65]                                                          |
| 61. Odontoceti                                                                                    | <i>Ferocetotherium</i>                                       | 23.03       | 33.9 <sup>B</sup>  | [66, 67]                                                      |
| 62. Physeteroidea                                                                                 | <i>Idiophyseter</i>                                          | 13.82       | 23.03              | [68];<br>Paleobiology<br>Database                             |
| 63. Phocoenidae + Monodontidae                                                                    | <i>Salumiphocoena stocktoni</i>                              | 12.1        | 20.44              | [7, 69]                                                       |
| 64. Perissodactyla                                                                                | <i>Hyracotherium</i>                                         | 55.5        | 61.6               | [7, 70]                                                       |
| 65. Ceratomorpha                                                                                  | <i>Cambaylophus</i>                                          | 53.7        | 61.6 <sup>B</sup>  | [71]                                                          |
| 66. Primatomorpha                                                                                 | <i>Purgatorius</i>                                           | 65.2        | 83.8               | [7, 22, 72]                                                   |
| 67. Primates                                                                                      | Numerous eosimiids (e.g., <i>Eosimias</i> )                  | 38.0        | 66.0               | [1, 73]                                                       |
| 68. Haplorhini                                                                                    | Numerous eosimiids (e.g., <i>Eosimias, Phenacopithecus</i> ) | 38.0        | 59.2               | [7, 73]                                                       |
| 69. Anthroipoidea                                                                                 | <i>Aegyptopithecus</i>                                       | 28.1        | 56.0               | [74, 75]                                                      |
| 70. Platyrrhini                                                                                   | <i>Aotus dindensis</i>                                       | 11.8        | 37.3               | [75]                                                          |
| 71. <i>Aotus</i> + <i>Saguinus</i> + <i>Leontopithecus</i> + <i>Callimico</i> + <i>Callithrix</i> | <i>Aotus dindensis</i>                                       | 11.8        | 28.5               | [75]                                                          |
| 72. Catarrhini                                                                                    | <i>Morotopithecus bishopi</i>                                | 20.55       | 38.0               | [75-77]                                                       |
| 73. Cercopithecoidea                                                                              | <i>Microcolobus turgenensis</i>                              | 8.5         | 13.82 <sup>B</sup> | [75, 78, 79]                                                  |
| 74. Papionini                                                                                     | <i>Macaca libyca</i>                                         | 5.5         | 11.62 <sup>B</sup> | [75]                                                          |

| Clade                                                            | Oldest crown fossil                                                 | Minimum age | Maximum age        | References for oldest fossil(s) and discussion of calibration |
|------------------------------------------------------------------|---------------------------------------------------------------------|-------------|--------------------|---------------------------------------------------------------|
| 75. Hominoidea                                                   | <i>Sivapithecus</i>                                                 | 12.68       | 23.03              | [75, 77]                                                      |
| 76. <i>Homo</i> + <i>Pan</i>                                     | <i>Ardipithecus ramidus kadabba</i>                                 | 5.11        | 7.246 <sup>B</sup> | [21, 75]                                                      |
| 77. Strepsirrhini                                                | <i>Saharagalago misrensis</i>                                       | 38.0        | 56.0               | [7, 80]                                                       |
| 78. Galagidae + Lorisidae                                        | <i>Saharagalago misrensis</i>                                       | 38.0        | 56.0               | [7, 80]                                                       |
| 79. Lagomorpha                                                   | Tarsals from Vastan mine                                            | 53.7        | 61.6               | [7, 52, 71, 81]                                               |
| 80. Rodentia                                                     | <i>Acritoparamys</i> ,<br><i>Paramys</i>                            | 56.0        | 66.0               | [1, 7]                                                        |
| 81. Sciuromorpha to Hystricognathi                               | <i>Acritoparamys</i>                                                | 56.0        | 66.0               | [7, 82-84]                                                    |
| 82. Sciuromorpha                                                 | <i>Eogiliravus</i>                                                  | 47.8        | 61.6               | [7, 9]                                                        |
| 83. Aplodontidae + Sciuridae                                     | <i>Spurimus</i>                                                     | 45.7        | 59.2               | [9, 85]                                                       |
| 84. Diatomyidae + Ctenodactylidae                                | <i>Fallomus</i>                                                     | 28.3        | 47.8               | [7, 9, 86]                                                    |
| 85. Hystricognathi                                               | <i>Cachiyacuy contamanensis</i>                                     | 40.94       | 56.0               | [7, 52, 87, 88]                                               |
| 86. Phiomorpha + Caviomorpha                                     | <i>Cachiyacuy contamanensis</i>                                     | 40.94       | 56.0               | [7, 52, 87, 88]                                               |
| 87. Caviidae + Hydrochoeridae + Dasyproctidae                    | <i>Asteromys</i> ,<br><i>Chubutomys</i>                             | 24.5        | 38.0               | [7, 89-91]                                                    |
| 88. Chinchillidae + Dinomyidae                                   | <i>Eoviscaccia</i>                                                  | 24.5        | 38.0               | [7, 89]                                                       |
| 89. Chinchillidae + Dinomyidae + <i>Abrocoma</i> + Octodontoidea | <i>Sallamys</i> ,<br><i>Xylechimys</i> ,<br><i>Deseadomys</i>       | 24.5        | 38.0               | [7, 89, 92, 93]                                               |
| 90. Octodontoidea                                                | <i>Sallamys</i> ,<br><i>Xylechimys</i> ,<br><i>Deseadomys</i>       | 24.5        | 38.0               | [7, 89, 92, 93]                                               |
| 91. Ctenomyidae + Octodontidae                                   | <i>Xenodontomys</i> ,<br><i>Palaeoctodon</i> ,<br><i>Chasicomys</i> | 9.07        | 33.9               | [7, 89, 94]                                                   |
| 92. Anomaluromorpha + Myomorpha                                  | <i>Erlanomys</i>                                                    | 54.0        | 61.6               | [95]                                                          |
| 93. Myomorpha (Muroidea + Dipodoidea)                            | <i>Pappocricetodon</i>                                              | 45.0        | 59.2               | [7, 96]                                                       |

| Clade                                                   | Oldest crown fossil      | Minimum age | Maximum age | References for oldest fossil(s) and discussion of calibration |
|---------------------------------------------------------|--------------------------|-------------|-------------|---------------------------------------------------------------|
| <b>94. Castorimorpha + Anomaluroomorpha + Myomorpha</b> | <i>Erlianomys</i>        | 54.0        | 66.0        | [9, 95]                                                       |
| <b>95. Geomyoidea</b>                                   | <i>Proheteromys</i>      | 31.4        | 41.3        | [7, 9, 85]                                                    |
| <b>96. Castorimorpha</b>                                |                          | 52.4        | 61.6        |                                                               |
| <b>97. <i>Rattus</i> + <i>Apodemus</i> + <i>Mus</i></b> | <i>Karnimata darwini</i> | 10.4        | 15.97       | [1, 7]                                                        |
| <b>98. Hydrochoeridae to Caviidae</b>                   | <i>Prodolichotis</i>     | 11.8        | 33.9        | [7]                                                           |
| <b>99. Scandentia</b>                                   | <i>Ptilocercus</i>       | 34.0        | 66.0        | [7, 97, 98]                                                   |

<sup>A</sup>Table modified after Emerling et al. [7] and Springer et al. [98].

<sup>B</sup>Maximum age based on stratigraphic bounding as in Springer et al. [28].

<sup>C</sup>As noted by Phillips [52], mesonychids may belong to crown Cetartiodactyla. Phillips [52] further suggested that this possibility should result in a maximum age of 71.2 Ma (base of Maastrichtian) for Cetartiodactyla following Meredith et al.'s [9] criteria for the application of stratigraphic bounding, but this is incorrect because Meredith et al. [9] employed the maximum of phylogenetic bracketing, phylogenetic uncertainty, or stratigraphic bounding, but not stratigraphic bounding on top of phylogenetic uncertainty. We therefore used a younger maximum of 66.0 Ma for Cetartiodactyla (also see Emerling et al. [7]).



## References

1. Benton M.J., Donoghue P.C., Asher R.J., Friedman M., Near T.J., Vinther J. 2015 Constraints on the timescale of animal evolutionary history. *Palaeontologia Electronica* **18**(1), 1-107.
2. Luo Z.-X., Cifelli R.L., Kielan-Jaworowska Z. 2001 Dual origin of tribosphenic mammals. *Nature* **409**(6816), 53-57.
3. Luo Z.-X., Gatesy S.M., Jenkins F.A., Amaral W.W., Shubin N.H. 2015 Mandibular and dental characteristics of Late Triassic mammaliaform Haramiyavia and their ramifications for basal mammal evolution. *Proc Natl Acad Sci USA* **112**(51), E7101-E7109.
4. Woodburne M.O., Rich T.H., Springer M.S. 2003 The evolution of tribospheny and the antiquity of mammalian clades. *Mol Phylogenet Evol* **28**(2), 360-385.
5. Bi S., Wang Y., Guan J., Sheng X., Meng J. 2014 Three new Jurassic euharamiyidan species reinforce early divergence of mammals. *Nature* **514**(7524), 579-584.
6. Krause D.W., Hoffmann S., Wible J.R., Kirk E.C., Schultz J.A., von Koenigswald W., Groenke J.R., Rossie J.B., O'Connor P.M., Seiffert E.R. 2014 First cranial remains of a gondwanatherian mammal reveal remarkable mosaicism. *Nature* **515**(7528), 512-517.
7. Emerling C.A., Huynh H.T., Nguyen M.A., Meredith R.W., Springer M.S. 2015 Spectral shifts of mammalian ultraviolet-sensitive pigments (short wavelength-sensitive opsin 1) are associated with eye length and photic niche evolution. *Proc R Soc B* **282**(1819), 20151817.
8. Rowe T., Rich T.H., Vickers-Rich P., Springer M., Woodburne M.O. 2008 The oldest platypus and its bearing on divergence timing of the platypus and echidna clades. *Proc Natl Acad Sci USA* **105**(4), 1238-1242.
9. Meredith R.W., Janecka J.E., Gatesy J., Ryder O.A., Fisher C.A., Teeling E.C., Goodbla A., Eizirik E., Simao T.L., Stadler T. 2011 Impacts of the Cretaceous Terrestrial Revolution and KPg extinction on mammal diversification. *Science* **334**(6055), 521-524.
10. Goin F.J., Sanchez-Villagra M.R., Abello A., Kay R.F. 2007 A new generalized paucituberculatan marsupial from the Oligocene of Bolivia and the origin of 'shrew-like' opossums. *Palaeontology* **50**(5), 1267-1276.
11. Goin F.J., Candela A.M., Abello M.A., Oliveira E.V. 2009 Earliest South American paucituberculatans and their significance in the understanding of 'pseudodiprotodont' marsupial radiations. *Zool J Linn Soc* **155**(4), 867-884.

12. Horovitz I., Martin T., Bloch J., Ladevèze S., Kurz C., Sánchez-Villagra M.R. 2009 Cranial anatomy of the earliest marsupials and the origin of opossums. *PLoS One* **4**(12), e8278.
13. Goin F.J. 1997 New clues for understanding the Neogene Marsupial Radiation. In *Vertebrate paleontology in the Neotropics: the Miocene fauna of La Venta, Colombia* (eds. Kay R., Madden R., Cifelli R.L., Flynn J.J.), pp. 520-550. Washington D.C., Smithsonian Institution Press.
14. Wroe S. 1999 The geologically oldest dasyurid, from the Miocene of Riversleigh, north - west Queensland. *Palaeontology* **42**(3), 501-527.
15. Turnbull W.D., Lundelius Jr E.L., Archer M. 2003 Dasyurids, Perameloids, Phalangeroids, and Vombatoids from the Early Pliocene Hamilton Fauna, Victoria, Australia. *Bull Am Mus Nat Hist* **279**, 513-540.
16. Godthelp H., Archer M., Cifelli R., Hand S.J., Gilkeson C.F. 1992 Earliest known Australian Tertiary mammal fauna. *Nature* **356**(6369), 514-516.
17. Case J.A., Meredith R.W., Person J. 2009 A pre-Neogene phalangerid possum from South Australia. *Mus No Ariz Bull* **65**, 659-675.
18. Woodburne M.O., MacFadden B.J., Case J.A., Springer M.S., Pledge N.S., Power J.D., Woodburne J.M., Springer K.B. 1993 Land mammal biostratigraphy and magnetostratigraphy of the Etadunna Formation (late Oligocene) of South Australia. *J Vertebr Paleontol* **13**(4), 483-515.
19. Kear B.P., Cooke B.N., Archer M., Flannery T.F. 2007 Implications of a new species of the Oligo-Miocene kangaroo (Marsupialia: Macropodoidea) Nambaroo, from the Riversleigh World Heritage Area, Queensland, Australia. *J Paleontol* **81**(06), 1147-1167.
20. Kear B.P., Pledge N.S. 2008 A new fossil kangaroo from the Oligocene-Miocene Etadunna Formation of Ngama Quarry, Lake Palankarina, South Australia. *Australian J Zool* **55**(6), 331-339.
21. Benton M., Donoghue P., Asher R. 2009 Calibrating and constraining molecular clocks. In *The TimeTree of life* (eds. Hedges S.B., Kumar S.), pp. 35-86. New York, Oxford University Press.
22. Chester S.G., Bloch J.I., Boyer D.M., Clemens W.A. 2015 Oldest known euarchontan tarsals and affinities of Paleocene Purgatorius to Primates. *Proc Natl Acad Sci USA* **112**(5), 1487-1492.
23. Avery D. 2001 The Plio-Pleistocene vegetation and climate of Sterkfontein and Swartkrans, South Africa, based on micromammals. *J Hum Evol* **41**(2), 113-132.

24. Seiffert E.R., Simons E.L., Ryan T.M., Bown T.M., Attia Y. 2007 New remains of Eocene and Oligocene Afrosoricida (Afrotheria) from Egypt, with implications for the origin (s) of afrosoricid zalambdodonty. *J Vertebr Paleontol* **27**(4), 963-972.
25. McKenna M.C., Bell S.K. 1997 *Classification of Mammals Above the Species Level*. New York, Columbia University Press.
26. Tabuce R., Asher R.J., Lehmann T. 2008 Afrotherian mammals: a review of current data. *Mammalia* **72**(1), 2-14.
27. Pickford M., Hlusko L.J. 2007 Late Miocene procaviid hyracoids (Hyracoidea: *Dendrohyrax*) from Lemudong'o, Kenya. *Kirtlandia* **56**, 106-111.
28. Springer M.S., Signore A.V., Pajmans J.L., Vélez-Juarbe J., Domning D.P., Bauer C.E., He K., Crerar L., Campos P.F., Murphy W.J. 2015 Interordinal gene capture, the phylogenetic position of Steller's sea cow based on molecular and morphological data, and the macroevolutionary history of Sirenia. *Mol Phylogenet Evol* **91**, 178-193.
29. Vignaud P., Durringer P., Mackaye H.T., Likius A., Blondel C., Boisserie J.-R., de Bonis L., Eisenmann V., Etienne M.-E., Geraads D., et al. 2002 Geology and palaeontology of the Upper Miocene Toros-Menalla hominid locality, Chad. *Nature* **418**(6894), 152-155.
30. Lebatard A.-E., Bourlès D.L., Durringer P., Jolivet M., Braucher R., Carcaillet J., Schuster M., Arnaud N., Monié P., Lihoreau F., et al. 2008 Cosmogenic nuclide dating of *Sahelanthropus tchadensis* and *Australopithecus bahrelghazali*: Mio-Pliocene hominids from Chad. *Proc Natl Acad Sci USA* **105**(9), 3226-3231.
31. Gheerbrant E. 2009 Paleocene emergence of elephant relatives and the rapid radiation of African ungulates. *Proc Natl Acad Sci USA* **106**(26), 10717-10721.
32. Kocsis L., Gheerbrant E., Mouflih M., Cappetta H., Yans J., Amaghaz M. 2014 Comprehensive stable isotope investigation of marine biogenic apatite from the late Cretaceous–early Eocene phosphate series of Morocco. *Palaeogeography, Palaeoclimatology, Palaeoecology* **394**, 74-88.
33. Vélez-Juarbe J., Domning D.P., Pyenson N.D. 2012 Iterative evolution of sympatric seacow (Dugongidae, Sirenia) assemblages during the past 26 million years. *PLoS One* **7**(2), e31294.
34. Vélez-Juarbe J., Domning D.P. 2014 Fossil Sirenia of the West Atlantic and Caribbean region. Ix. *Metaxytherium albifontanum*, sp. nov. *J Vertebr Paleontol* **34**(2), 444-464.
35. Vélez-Juarbe J., Domning D.P. 2015 Fossil Sirenia of the West Atlantic and Caribbean region. xi. *Callistosiren boriquirensis*, gen. et sp. nov. *J Vertebr Paleontol* **35**(1), e885034.

36. Bergqvist L.P., Abrantes E.A., Dos Santos Avilla L. 2004 The xenarthra (mammalia) of são josé de itaboraí basin (upper paleocene, itaboraian), rio de janeiro, brazil. *Geodiversitas* **26**(2), 323-337.
37. Woodburne M.O., Goin F.J., Bond M., Carlini A.A., Gelfo J.N., López G.M., Iglesias A., Zimicz A.N. 2014 Paleogene land mammal faunas of South America; a response to global climatic changes and indigenous floral diversity. *J Mamm Evol* **21**(1), 1-73.
38. Hirschfeld S.E. 1976 A new fossil anteater (Edentata, Mammalia) from Colombia, SA and evolution of the Vermilingua. *J Paleontol* **50**, 419-432.
39. Hunt R.M. 1998 Evolution of the aeluroid Carnivora. Diversity of the earliest aeluroids from Eurasia (Quercy, Hsanda-Gol) and the origin of felids. *Am Mus Novit* **3252**, 1-65.
40. Wesley-Hunt G.D., Flynn J.J. 2005 Phylogeny of the Carnivora: basal relationships among the carnivoramorhans, and assessment of the position of 'Miacoidea' relative to Carnivora. *J Syst Palaeontol* **3**(01), 1-28.
41. Holliday J.A. 2007 Phylogeny and Character Change in the Feloid Carnivora. The Florida State University, The Florida State University.
42. Barycka E. 2007 Evolution and systematics of the feliform Carnivora. *Mammalian Biology-Zeitschrift für Säugetierkunde* **72**(5), 257-282.
43. Spaulding M., Flynn J.J. 2009 Anatomy of the postcranial skeleton of "Miacis" *uintensis* (Mammalia: Carnivoramorpha). *J Vertebr Paleontol* **29**(4), 1212-1223.
44. Finarelli J.A. 2008 A total evidence phylogeny of the Arctoidea (Carnivora: Mammalia): relationships among basal taxa. *J Mamm Evol* **15**(4), 231-259.
45. Boessenecker R.W., Churchill M. 2015 The oldest known fur seal. *Biol Lett* **11**(2), 20140835.
46. Demere T.A., Berta A., Adam P.J. 2003 Pinnipedimorph Evolutionary Biogeography. *Bull Am Mus Nat Hist* **279**, 32-76.
47. Fox R.C., Scott C.S., Rankin B.D. 2010 New early carnivoran specimens from the Puercan (earliest Paleocene) of Saskatchewan, Canada. *J Paleontol* **84**(06), 1035-1039.
48. Eiting T.P., Gunnell G.F. 2009 Global completeness of the bat fossil record. *J Mamm Evol* **16**(3), 151-173.
49. Gunnell G.F., Simmons N.B. 2005 Fossil evidence and the origin of bats. *J Mamm Evol* **12**(1-2), 209-246.

50. Storch G., Sigé B., Habersetzer J. 2002 *Tachypteron franzeni* n. gen., n. sp., earliest emballonurid bat from the Middle Eocene of Messel (Mammalia, Chiroptera). *Paläontologische Zeitschrift* **76**(2), 189-199.
51. Ravel A., Marivaux L., Tabuce R., Ben Haj Ali M., Essis E., Vianey - Liaud M. 2012 A new large philisid (Mammalia, Chiroptera, Vespertilionoidea) from the late Early Eocene of Chambi, Tunisia. *Palaeontology* **55**(5), 1035-1041.
52. Phillips M.J. 2015 Four mammal fossil calibrations: balancing competing palaeontological and molecular considerations. *Palaeontologia Electronica* **18**(1), 1-16.
53. Lim B.K. 2009 Review of the origins and biogeography of bats in South America. *Chiroptera Neotropical* **15**(1), 391-410.
54. Cozzuol M.A. 2006 The Acre vertebrate fauna: age, diversity, and geography. *J South Amer Earth Sci* **21**(3), 185-203.
55. Czaplewski N.J., Morgan G.S., McLeod S. 2008 Chiroptera. In *Evolution of Tertiary Mammals of North America: Volume 2* (eds. Janis C.M., Gunnell G.F., Uhen M.D.), pp. 174-197. New York, Cambridge University Press.
56. Morgan G.S., Czaplewski N.J. 2003 A new bat (Chiroptera: Natalidae) from the early Miocene of Florida, with comments on natalid phylogeny. *J Mammal* **84**(2), 729-752.
57. dos Reis M., Inoue J., Hasegawa M., Asher R.J., Donoghue P.C., Yang Z. 2012 Phylogenomic datasets provide both precision and accuracy in estimating the timescale of placental mammal phylogeny. *Proc R Soc B*, rspb20120683.
58. Drake R.E., Van Couvering J.A., Pickford M.H., Curtis G.H., Harris J.A. 1988 New chronology for the Early Miocene mammalian faunas of Kisingiri, Western Kenya. *J Geol Soc* **145**(3), 479-491.
59. Theodor J.M. 2004 Molecular clock divergence estimates and the fossil record of Cetartiodactyla. *J Paleontol* **78**(01), 39-44.
60. Solounias N., Barry J.C., Bernor R.L., Lindsay E., Raza S.M. 1995 The oldest bovid from the Siwaliks, Pakistan. *J Vertebr Paleontol* **15**(4), 806-814.
61. Orliac M.J., Pierre - Olivier A., Ducrocq S. 2010 Phylogenetic relationships of the Suidae (Mammalia, Cetartiodactyla): new insights on the relationships within Suoidea. *Zool Scr* **39**(4), 315-330.
62. Uhen M.D. 2010 The origin (s) of whales. *Annu Revi Earth Planet Sci* **38**, 189-219.

63. Fordyce E. 2005 New specimen of archaic baleen whale *Mauicetus parki* (Late Oligocene, New Zealand) elucidates early crown-Mysticeti. *J Vertebr Paleontol* **25**(3), 58A-58A.
64. Boessenecker R.W., Fordyce R.E. 2015 A new genus and species of eomysticetid (Cetacea: Mysticeti) and a reinterpretation of '*Mauicetus*' *lophocephalus* Marples, 1956: transitional baleen whales from the upper Oligocene of New Zealand. *Zool J Linn Soc* **175**(3), 607-660.
65. Bisconti M. 2010 A new balaenopterid whale from the Late Miocene of the Stirone River, northern Italy (Mammalia, Cetacea, Mysticeti). *J Vertebr Paleontol* **30**(3), 943-958.
66. Lambert O., Bianucci G., de Muizon C. 2008 A new stem-sperm whale (Cetacea, Odontoceti, Physeteroidea) from the latest Miocene of Peru. *Comptes Rendus Palevol* **7**(6), 361-369.
67. Gol'din P., Marareskul V. 2013 Miocene Toothed Whales (Cetacea, Odontoceti) from the Dniester Valley: The First Record of Sperm Whales (Physeteroidea) from The Eastern Europe. *Vestnik zoologii* **47**(5), 21-26.
68. Bianucci G., Landini W. 2006 Killer sperm whale: a new basal physeteroid (Mammalia, Cetacea) from the Late Miocene of Italy. *Zool J Linn Soc* **148**(1), 103-131.
69. Uhen M.D., Fordyce R.E., Barnes L.G. 2008 Odontoceti. In *Evolution of Tertiary Mammals of North America: Volume 2* (eds. Janis C.M., Gunnell G.F., Uhen M.D.), pp. 556-606. New York, Cambridge University Press.
70. Woodburne M.O., Gunnell G.F., Stucky R.K. 2009 Climate directly influences Eocene mammal faunal dynamics in North America. *Proc Natl Acad Sci USA* **106**(32), 13399-13403.
71. Kapur V.V., Bajpai S. 2015 Oldest South Asian tapiromorph (Perissodactyla, Mammalia) from the Cambay Shale Formation, western India, with comments on its phylogenetic position and biogeographic implications. *The Palaeobotanist* **64**, 95-103.
72. O'Leary M.A., Bloch J.I., Flynn J.J., Gaudin T.J., Giallombardo A., Giannini N.P., Goldberg S.L., Kraatz B.P., Luo Z.-X., Meng J. 2013 The placental mammal ancestor and the post-K-Pg radiation of placentals. *Science* **339**(6120), 662-667.
73. Williams B.A., Kay R.F., Kirk E.C. 2010 New perspectives on anthropoid origins. *Proc Natl Acad Sci USA* **107**(11), 4797-4804.
74. Kay R.F., Fleagle J., Mitchell T., Colbert M., Bown T., Powers D.W. 2008 The anatomy of *Dolichocebus gaimanensis*, a stem platyrrhine monkey from Argentina. *J Hum Evol* **54**(3), 323-382.

75. Springer M.S., Meredith R.W., Gatesy J., Emerling C.A., Park J., Rabosky D.L., Stadler T., Steiner C., Ryder O.A., Janečka J.E. 2012 Macroevo­lutionary dynamics and historical biogeography of primate diversification inferred from a species supermatrix. *PLoS One* **7**(11), e49521.
76. Young N.M., MacLatchy L. 2004 The phylogenetic position of *Morotopithecus*. *J Hum Evol* **46**(2), 163-184.
77. Finarelli J.A., Clyde W.C. 2004 Reassessing hominoid phylogeny: evaluating congruence in the morphological and temporal data. *Paleobiology* **30**(04), 614-651.
78. Benefit B., Pickford M. 1986 Miocene fossil cercopithecoids from Kenya. *American Journal of Physical Anthropology* **69**, 441-464.
79. Jablonski N.G., Leakey M.G., Kiarie C., Antón M. 2002 A new skeleton of *Theropithecus brumpti* (Primates: cercopithecidae) from Lomekwi, west turkana, Kenya. *J Hum Evol* **43**(6), 887-923.
80. Seiffert E.R., Simons E.L., Attia Y. 2003 Fossil evidence for an ancient divergence of lorises and galagos. *Nature* **422**(6930), 421-424.
81. Rose K.D., DeLeon V.B., Missiaen P., Rana R., Sahni A., Singh L., Smith T. 2008 Early Eocene lagomorph (Mammalia) from Western India and the early diversification of Lagomorpha. *Proc Roy Soc B* **275**(1639), 1203-1208.
82. Korth W.W. 1994 *The Tertiary Record of Rodents in North America*. New York, Plenum Press.
83. Anderson D. 2008 Ischyromyidae. In *Evolution of Tertiary Mammals of North America Volume 2* (eds. Janis C., Gunnell G., Uhen M.), pp. 311-325. New York, Cambridge University Press.
84. Janis C.M., Dawson M.R., Flynn L.J. 2008 Glires. In *Evolution of Tertiary Mammals of North America: Volume 2* (eds. Janis C.M., Gunnell G.F., Uhen M.D.), pp. 263-292. New York, Cambridge University Press.
85. Flynn L.J., Jacobs L.L. 2008 Aplodontioidea. In *Evolution of Tertiary Mammals of North America: Volume 2* (eds. Janis C.M., Gunnell G.F., Uhen M.D.), pp. 377-390. New York, Cambridge University Press.
86. Dawson M.R., Marivaux L., Li C.-k., Beard K.C., Métais G. 2006 *Laonastes* and the "Lazarus effect" in recent mammals. *Science* **311**(5766), 1456-1458.
87. Hartenberger J.-L. 1998 Description de la radiation des Rodentia (Mammalia) du Paléocène supérieur au Miocène; incidences phylogénétiques. *Comptes Rendus de l'Académie des Sciences-Series IIA-Earth and Planetary Science* **326**(6), 439-444.

88. Antoine P.-O., Marivaux L., Croft D.A., Billet G., Ganerød M., Jaramillo C., Martin T., Orliac M.J., Tejada J., Altamirano A.J. 2011 Middle Eocene rodents from Peruvian Amazonia reveal the pattern and timing of caviomorph origins and biogeography. *Proc Roy Soc B* **279**, 1319-1326.
89. Vucetich M.G., Verzi D.H., Hartenberger J.-L. 1999 Review and analysis of the radiation of the South American Hystricognathi (Mammalia, Rodentia). *Comptes Rendus de l'Académie des Sciences-Series IIA-Earth and Planetary Science* **329**(10), 763-769.
90. Campbell K., Frailey C., Romero-Pittman L. 2004 The Paleogene Santa Rosa local fauna of Amazonian Perú: geographic and geologic setting. *Natural History Museum of Los Angeles County, Science Series* **40**, 3-14.
91. Frailey C., Campbell K. 2004 Paleogene rodents from Amazonian Peru: the Santa Rosa local fauna. *Nat Hist Mus Los Angeles County Science Series* **40**, 71-130.
92. Flynn J.J., Swisher C. 1995 Cenozoic South American land mammal ages: correlation to global geochronologies. In *Geochronology, Time-scales, and Global Stratigraphic Correlation, SEPM* (eds. Berggren W., Kent D., Hardenbol J.), pp. 317-333. Tulsa, Oklahoma, Society for Sedimentary Geology.
93. Flynn J.J., Wyss A.R. 1998 Recent advances in South American mammalian paleontology. *Trends Ecol Evol* **13**(11), 449-454.
94. Zárate M.A., Schultz P.H., Blasi A., Heil C., King J., Hames W. 2007 Geology and geochronology of type Chasicoan (late Miocene) mammal-bearing deposits of Buenos Aires (Argentina). *J South Amer Earth Sci* **23**(1), 81-90.
95. Li Q., Meng J. 2010 *Erlianomys combinatus*, a primitive myodont rodent from the Eocene Arshanto Formation, Nuhetingboerhe, Nei Mongol, China. *Vertebr Palasiatica* **48**(2), 133-144.
96. Beard K.C., Qi T., Dawson M.R., Wang B., Li C. 1994 A diverse new primate fauna from middle Eocene fissure-fillings in southeastern China. *Nature* **368**(6472), 604-609.
97. Li Q., Ni X. 2016 An early Oligocene fossil demonstrates treeshrews are slowly evolving “living fossils”. *Scientific reports* **6**, 18627.
98. Springer M.S., Emerling C.A., Meredith R.W., Janecka J.E., Eizirik E., Murphy W.J. submitted Waking the undead: implications of a soft explosive model for the timing of placental mammal diversification. *Mol Phylogenet Evol*.
